# Supplementary material for: Cu-Catalyzed Arylation of Bromo-Difluoro-Acetamides by Aryl Boronic Acids, Aryl Trialkoxysilanes and Dimethyl-Aryl-Sulfonium Salts: New Entries to Aromatic Amides
Source: Molecules. 2021 May 16;26(10):2957. doi: 10.3390/molecules26102957 (PMC8156957; doi:10.3390/molecules26102957)
Supplement: Supplementary file 1 [file molecules-26-02957-s001.zip › molecules-1225113-supplementary.pdf]

# **Cu-catalyzed arylation of bromo-difluoro-acetamides by aryl boronic acids, aryl trialkoxysilanes and dimethyl-aryl-sulfonium salts: New entries to aromatic amides.**

Satenik Mkrtchyan,<sup>a\*</sup> Michał Jakubczyk,<sup>a,b</sup> Suneel Lanka,<sup>a,c</sup> Michael Pittelkow,<sup>d</sup> Viktor O. Iaroshenko.<sup>a,e,f\*</sup>

a. Laboratory of Homogeneous Catalysis and Molecular Design at the Center of Molecular and Macromolecular Studies, Polish Academy of Sciences, Sienkiewicza 112, 90-363 Łódź, Poland.

b. Institute of Bioorganic Chemistry, Polish Academy of Sciences, Noskowskiego 12/14, 61-704 Poznań, Poland.

c. Institute of General and Ecological Chemistry, Lodz University of Technology, Zeromskiego 116, 909-24, Poland.

d. Department of Chemistry, University of Copenhagen, Universitetsparken 5, 2100 Copenhagen Ø, Denmark.

e. Dipartimento di Chimica e Biologia "A. Zambelli" Università di Salerno, Via Giovanni Paolo II, 84084, Fisciano (SA), Italy.

f. Department of Chemistry, University of Helsinki, A.I. Virtasen aukio 1, 00014 Helsinki, Finland.

## Table of Contents

|                                                              |   |
|--------------------------------------------------------------|---|
| (A) List of reagents used.....                               | 3 |
| (B) Copies $^1\text{H}$ and $^{13}\text{C}$ NMR spectra..... | 6 |

## (A) List of reagents used.

### *Scope of 2-bromo-2,2-difluoroacetamides:*

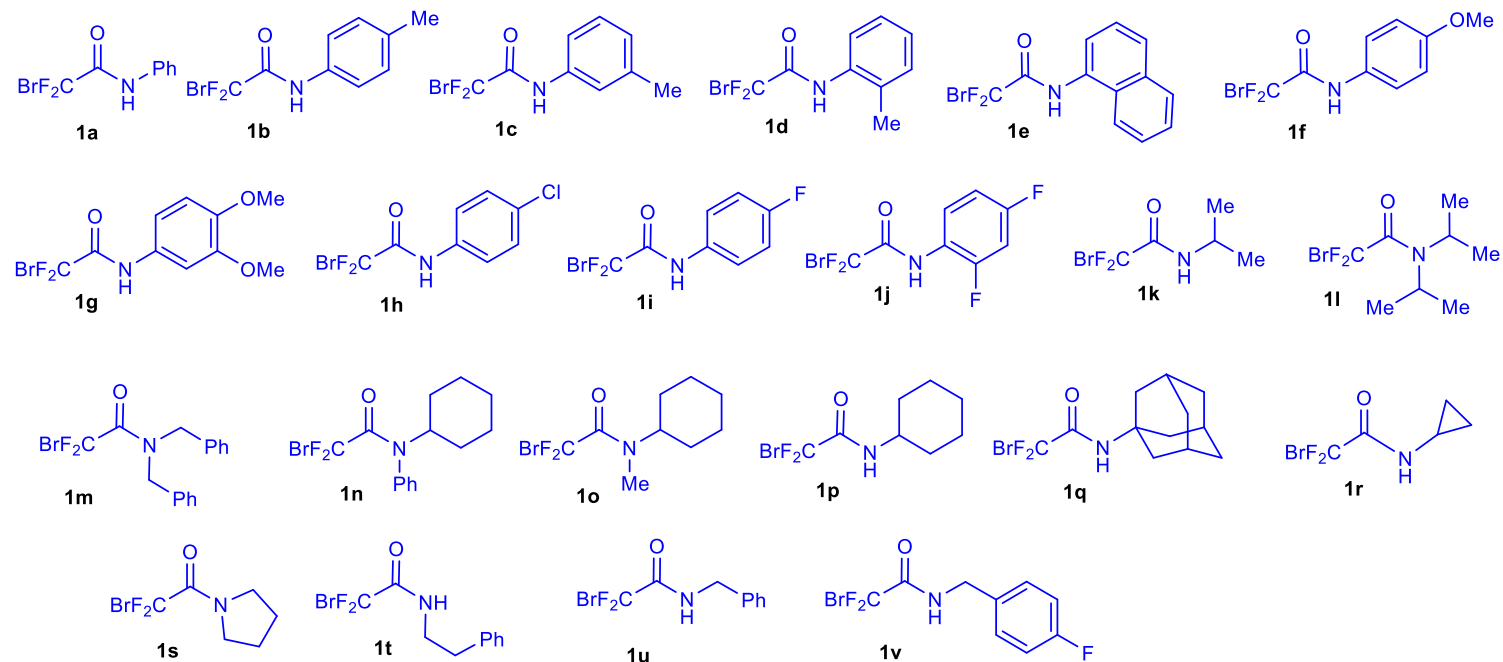

**Scheme S1.** List of 2-bromo-2,2-difluoroacetamides **1** used for preparation of amides **5**.

**Scope of aryl boronic acids:**

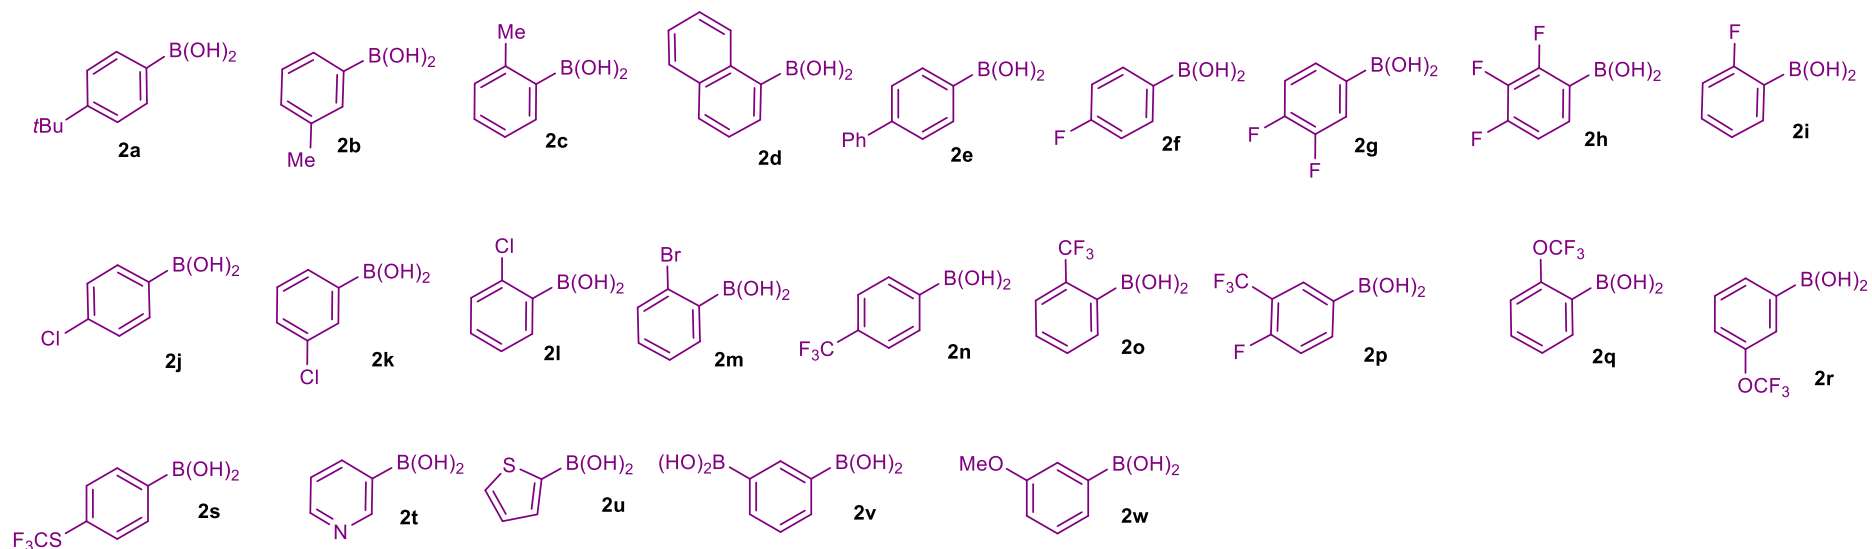

**Scheme S2.** List of aryl boronic acids **2** used for preparation of amides **5**.

**Scope of (aryl)trialkoxysilanes:**

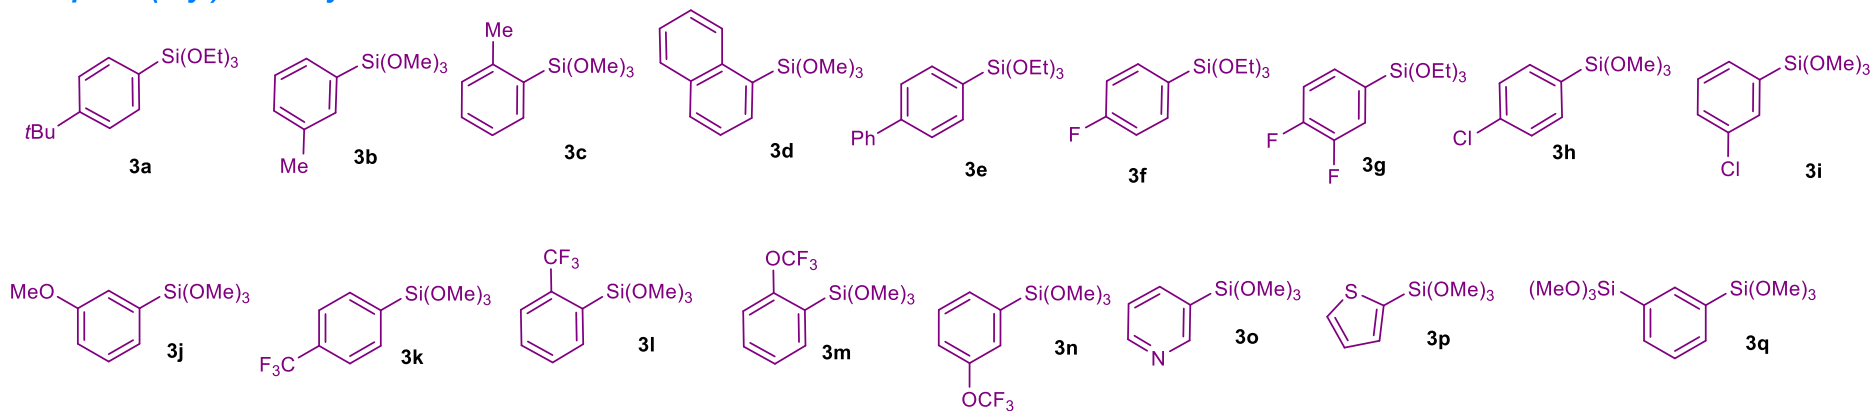

**Scheme S3.** List of (aryl)trialkoxysilanes **3** used for preparation of amides **5**.

**Scope of dimethyl(aryl)sulfoniums:**

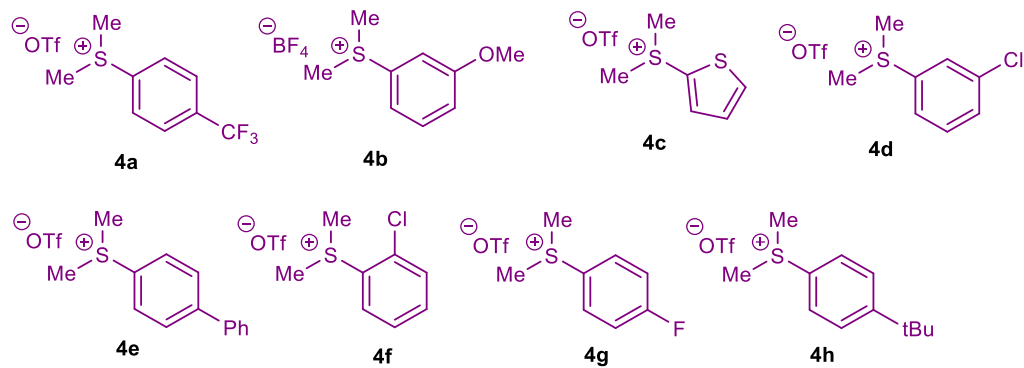

**Scheme S4.** List of (aryl)dimethylsulfonium salts **4** used for preparation of amides **5**.

**(B) Copies  $^1\text{H}$  and  $^{13}\text{C}$  NMR spectra.**

# Compound 5a (NMR in DMSO-*d*<sub>6</sub>)

SpinWorks 4: IVA 2380 1H

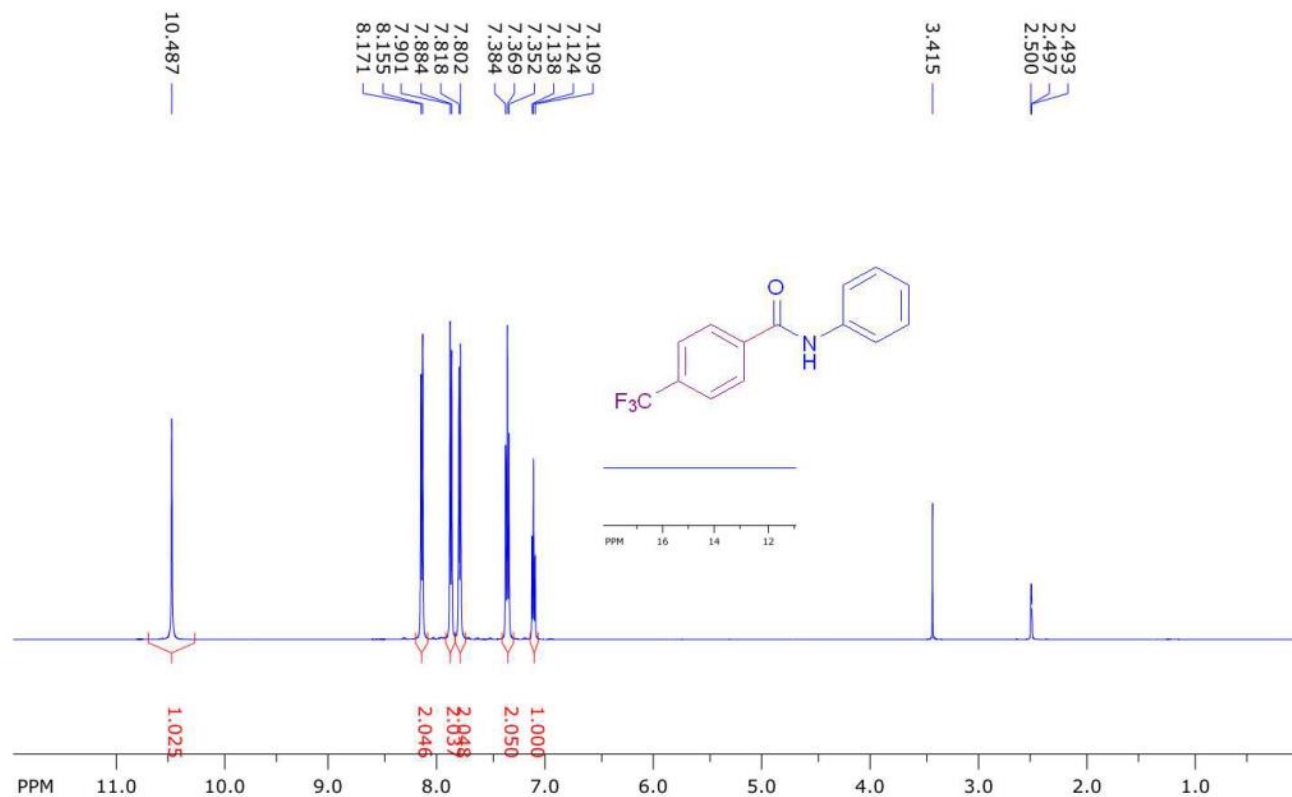

file: ...NAPO\NMR\500-2\mkr10207\9 2380\fid exp: <zg30>  
transmitter freq.: 500.133001 MHz  
time domain size: 65536 points  
width: 12335.53 Hz = 24.6645 ppm = 0.188225 Hz/pt  
number of scans: 24

freq. of 0 ppm: 500.130007 MHz  
processed size: 65536 complex points  
LB: 0.300 GF: 0.0000  
Hz/cm: 239.069 ppm/cm: 0.47801

# Compound 5a (NMR in DMSO-*d*<sub>6</sub>)

SpinWorks 4: IVA 2380 13C

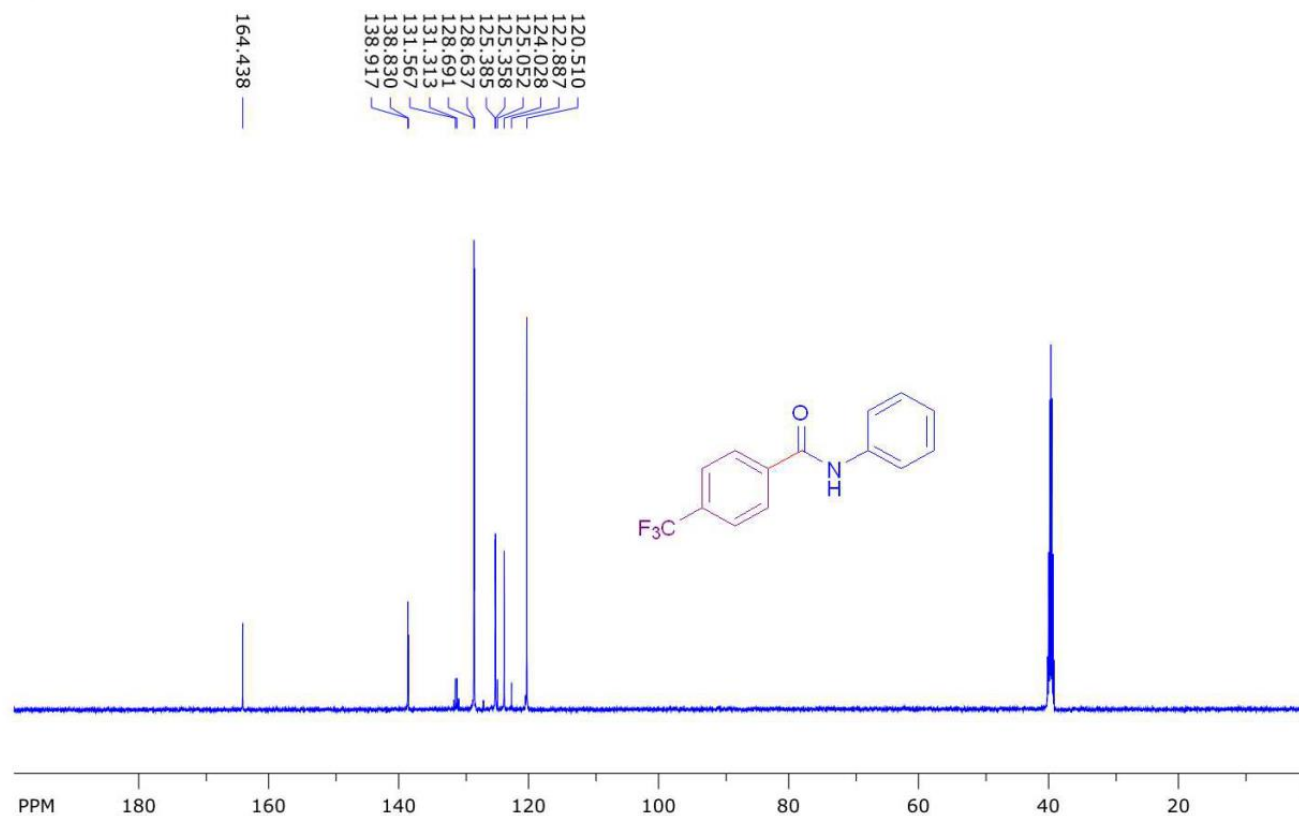

file: D:\NAPO\NMR\500-2\mkr10207\10\fid expt: <zpgp30>  
 transmitter freq.: 125.772879 MHz  
 time domain size: 65536 points  
 width: 36057.69 Hz = 286.6889 ppm = 0.550197 Hz/pt  
 number of scans: 512

freq. of 0 ppm: 125.757839 MHz  
 processed size: 32768 complex points  
 LB: 2.000 GF: 0.0000  
 Hz/cm: 1006.744 ppm/cm: 8.00446

# Compound 5b (NMR in CDCl<sub>3</sub>)

SpinWorks 4: IVA 1422 1H

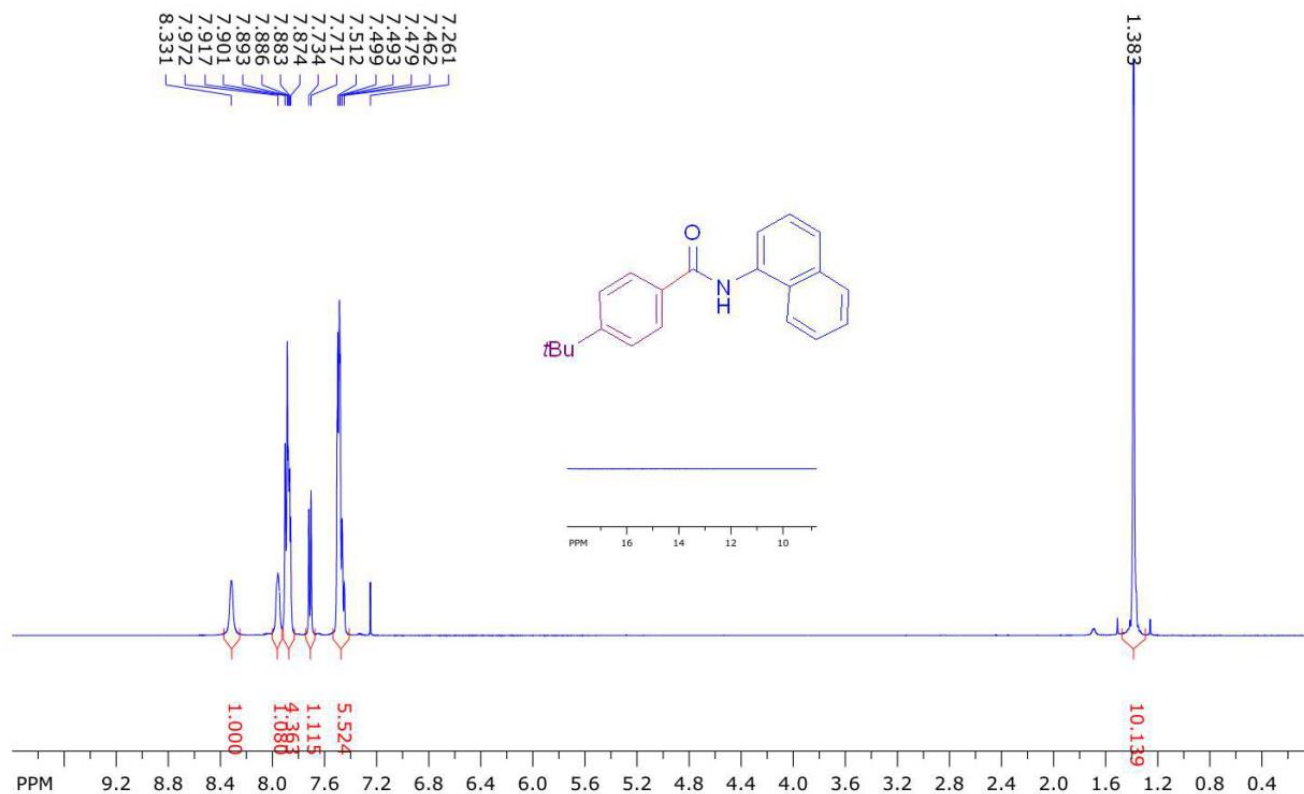

file: D:\NAPO\NMR\500-2\mkr12812\9\fid expt: <zg30>  
 transmitter freq.: 500.133001 MHz  
 time domain size: 65536 points  
 width: 12335.53 Hz = 24.6645 ppm = 0.188225 Hz/pt  
 number of scans: 24

freq. of 0 ppm: 500.130023 MHz  
 processed size: 65536 complex points  
 LB: 0.300 GF: 0.0000  
 Hz/cm: 199.770 ppm/cm: 0.39943

# Compound 5b (NMR in CDCl<sub>3</sub>)

SpinWorks 4: IVA 1422 13C

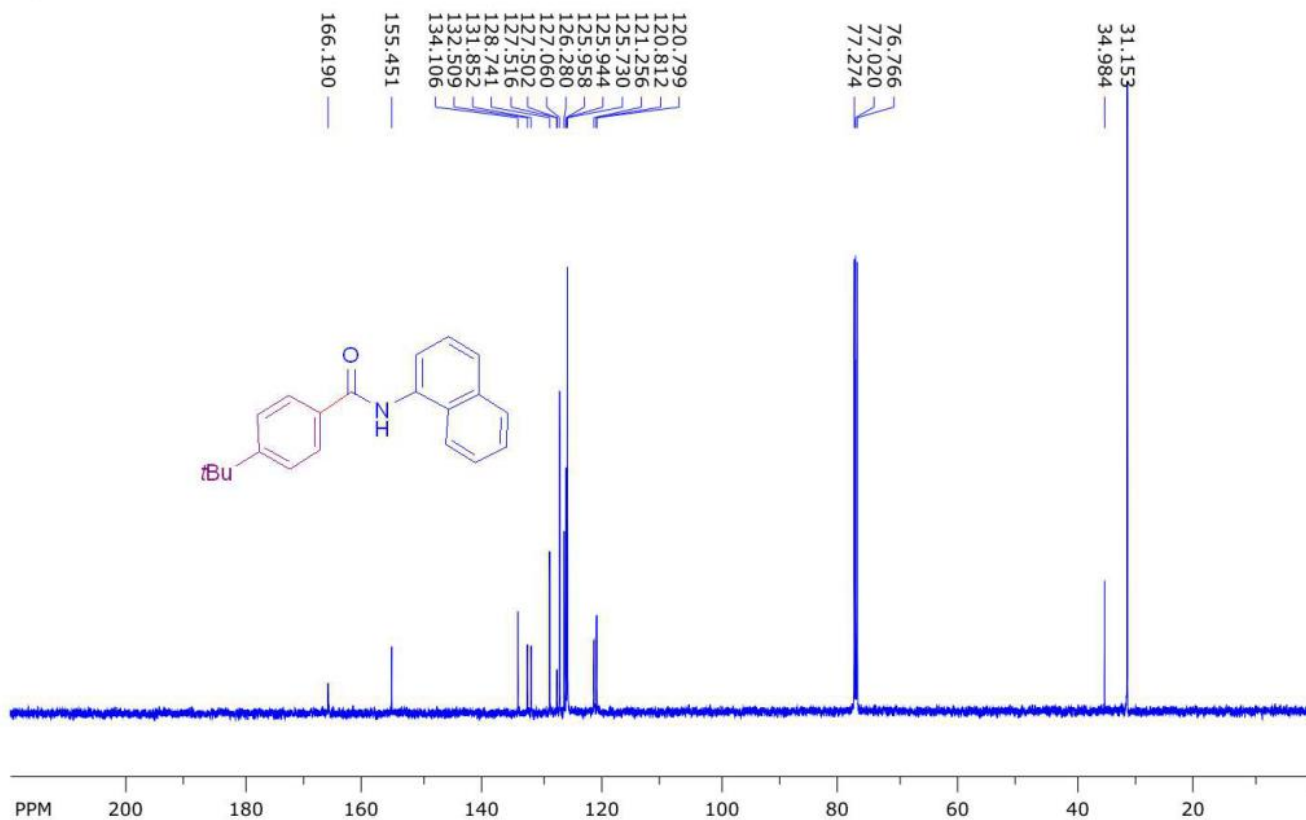

file: D:\NAPO\NMR\500-2\mkr12812\10\fid expt: <zpgp30>  
transmitter freq.: 125.772879 MHz  
time domain size: 65536 points  
width: 36057.69 Hz = 286.6889 ppm = 0.550197 Hz/pt  
number of scans: 512

freq. of 0 ppm: 125.757798 MHz  
processed size: 32768 complex points  
LB: 2.000 GF: 0.0000  
Hz/cm: 1107.258 ppm/cm: 8.80363

# Compound 5c (NMR in CDCl<sub>3</sub>)

SpinWorks 4: IVA 1428 1H CDCl<sub>3</sub>

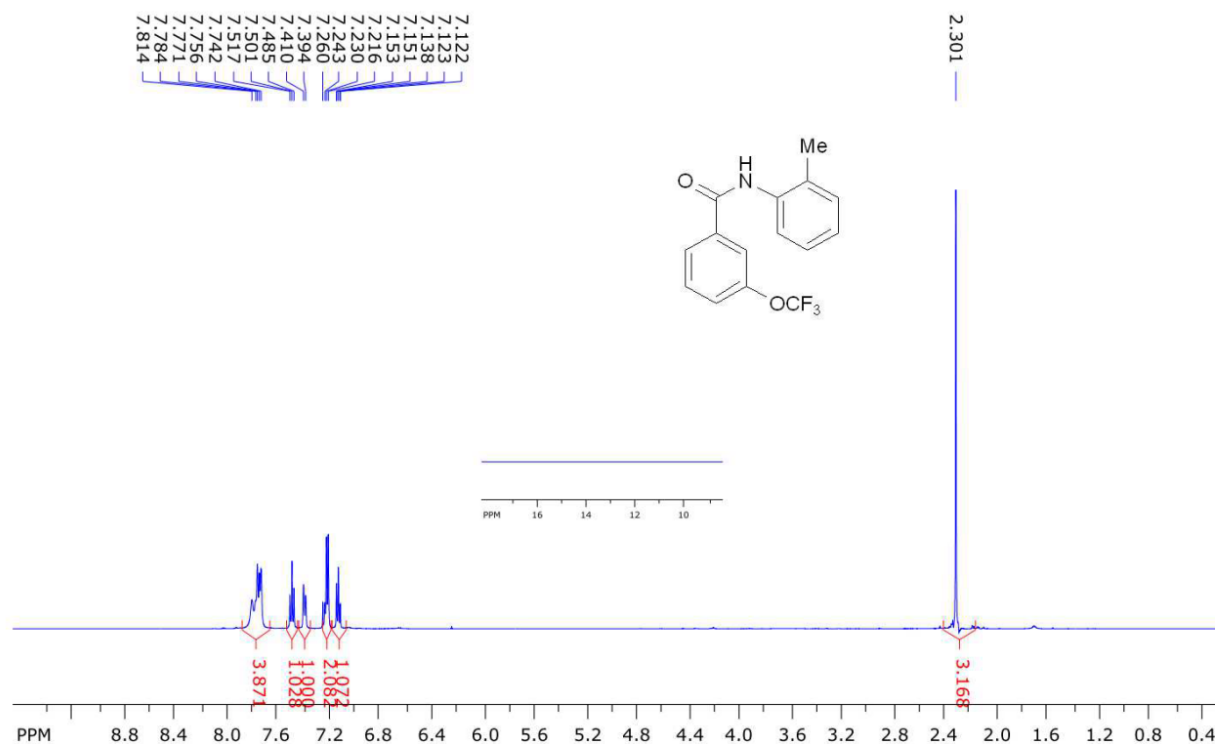

file: D:\NAPO\NMR\500-2\mkr11801\21\fid expt: <zg30>  
 transmitter freq.: 500.133001 MHz  
 time domain size: 65536 points  
 width: 12335.53 Hz = 24.6645 ppm = 0.188225 Hz/pt  
 number of scans: 24

freq. of 0 ppm: 500.130023 MHz  
 processed size: 65536 complex points  
 LB: 0.300 GF: 0.0000  
 Hz/cm: 190.126 ppm/cm: 0.38015

# Compound 5c (NMR in CDCl<sub>3</sub>)

SpinWorks 4: IVA 1428 13C CDCl<sub>3</sub>

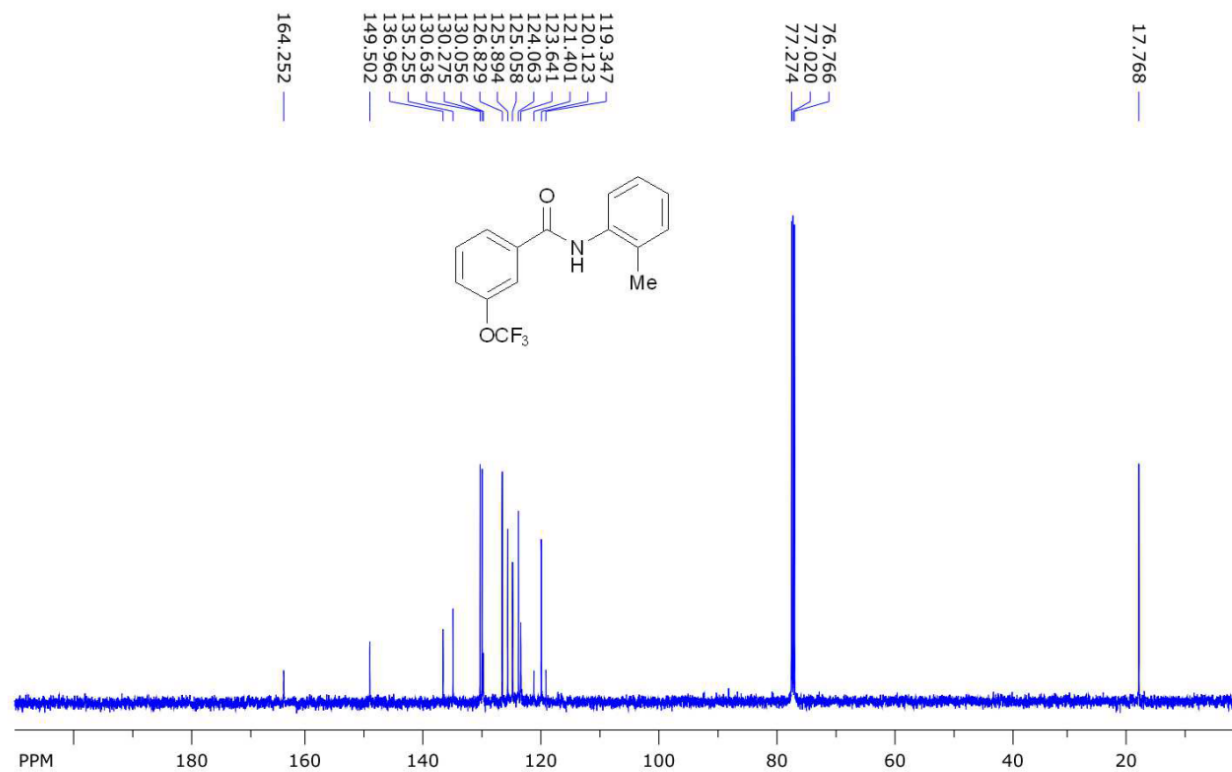

file: D:\NAPO\NMR\500-2\mkr11801\22\fid expt: <zpgg30>  
 transmitter freq.: 125.772879 MHz  
 time domain size: 65536 points  
 width: 36057.69 Hz = 286.6889 ppm = 0.550197 Hz/pt  
 number of scans: 256

freq. of 0 ppm: 125.757795 MHz  
 processed size: 32768 complex points  
 LB: 2.000 GF: 0.0000  
 Hz/cm: 1055.266 ppm/cm: 8.39025

# Compound 5d (NMR in CDCl<sub>3</sub>)

SpinWorks 4: IVA 1431 1H CDCl<sub>3</sub>

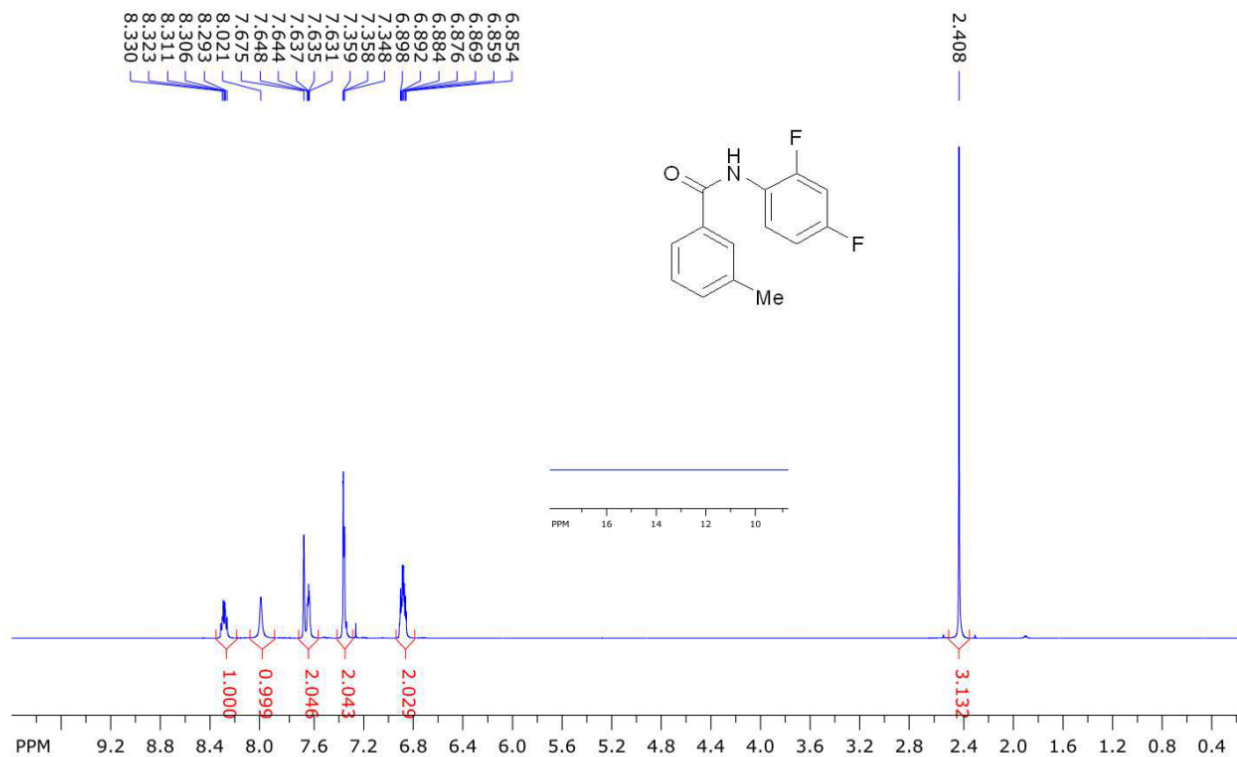

file: D:\NAPO\NMR\500-2\mkr11712\11\fid expt: <zg30>  
 transmitter freq.: 500.133001 MHz  
 time domain size: 65536 points  
 width: 12335.53 Hz = 24.6645 ppm = 0.188225 Hz/pt  
 number of scans: 24

freq. of 0 ppm: 500.130024 MHz  
 processed size: 65536 complex points  
 LB: 0.300 GF: 0.0000  
 Hz/cm: 198.613 ppm/cm: 0.39712

# Compound 5d (NMR in CDCl<sub>3</sub>)

SpinWorks 4: IVA 1431 13C CDCl<sub>3</sub>

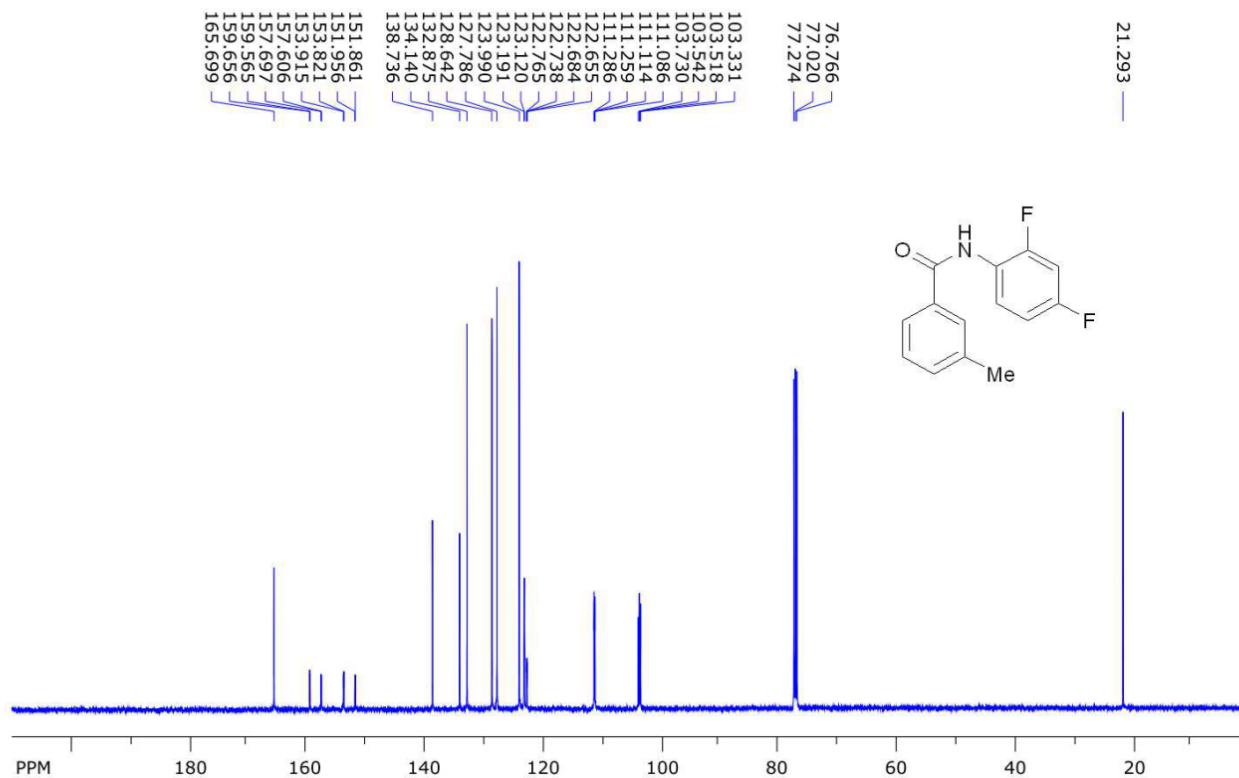

file: D:\NAPO\NMR\500-2\mkr11712\12\fid expt: <zgpg30>  
 transmitter freq.: 125.772879 MHz  
 time domain size: 65536 points  
 width: 36057.69 Hz = 286.6889 ppm = 0.550197 Hz/pt  
 number of scans: 1024

freq. of 0 ppm: 125.757800 MHz  
 processed size: 32768 complex points  
 LB: 2.000 GF: 0.0000  
 Hz/cm: 1058.574 ppm/cm: 8.41656

# Compound 5e (NMR in CDCl<sub>3</sub>)

SpinWorks 4: IVA 1826 1H CDCl<sub>3</sub>

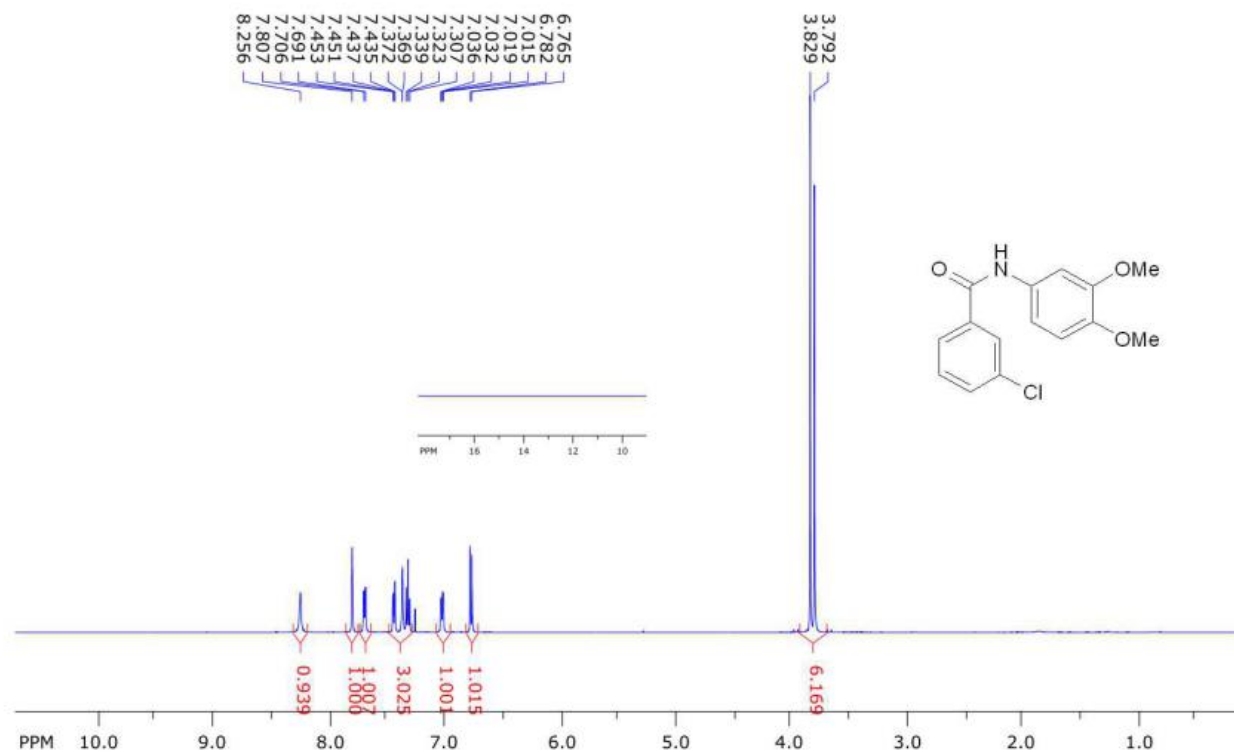

file: D:\NAPO\NMR\500-2\mkr11204\11\fid expt: <zg30>  
 transmitter freq.: 500.133001 MHz  
 time domain size: 65536 points  
 width: 12335.53 Hz = 24.6645 ppm = 0.188225 Hz/pt  
 number of scans: 24

freq. of 0 ppm: 500.130023 MHz  
 processed size: 65536 complex points  
 LB: 0.300 GF: 0.0000  
 Hz/cm: 213.325 ppm/cm: 0.42654

# Compound 5e (NMR in CDCl<sub>3</sub>)

SpinWorks 4: IVA 1826 13C CDCl<sub>3</sub>

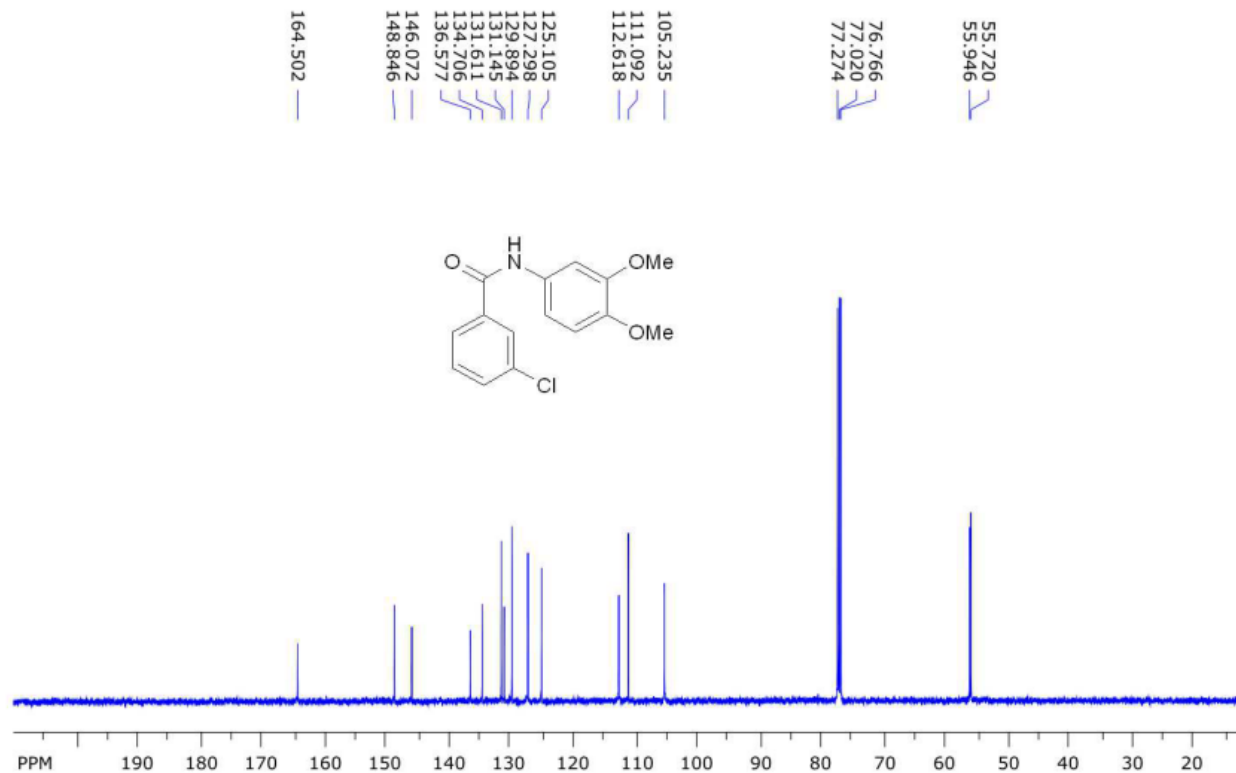

file: D:\NAPO\NMR\500-2\mkr11204\12\fid expt: <zgpg30>  
 transmitter freq.: 125.772879 MHz  
 time domain size: 65536 points  
 width: 36057.69 Hz = 286.6889 ppm = 0.550197 Hz/pt  
 number of scans: 512

freq. of 0 ppm: 125.757800 MHz  
 processed size: 32768 complex points  
 LB: 2.000 GF: 0.0000  
 Hz/cm: 1002.184 ppm/cm: 7.96820

# Compound 5f (NMR in CDCl<sub>3</sub>)

SpinWorks 4: IVA 2381 1H CDCl<sub>3</sub>

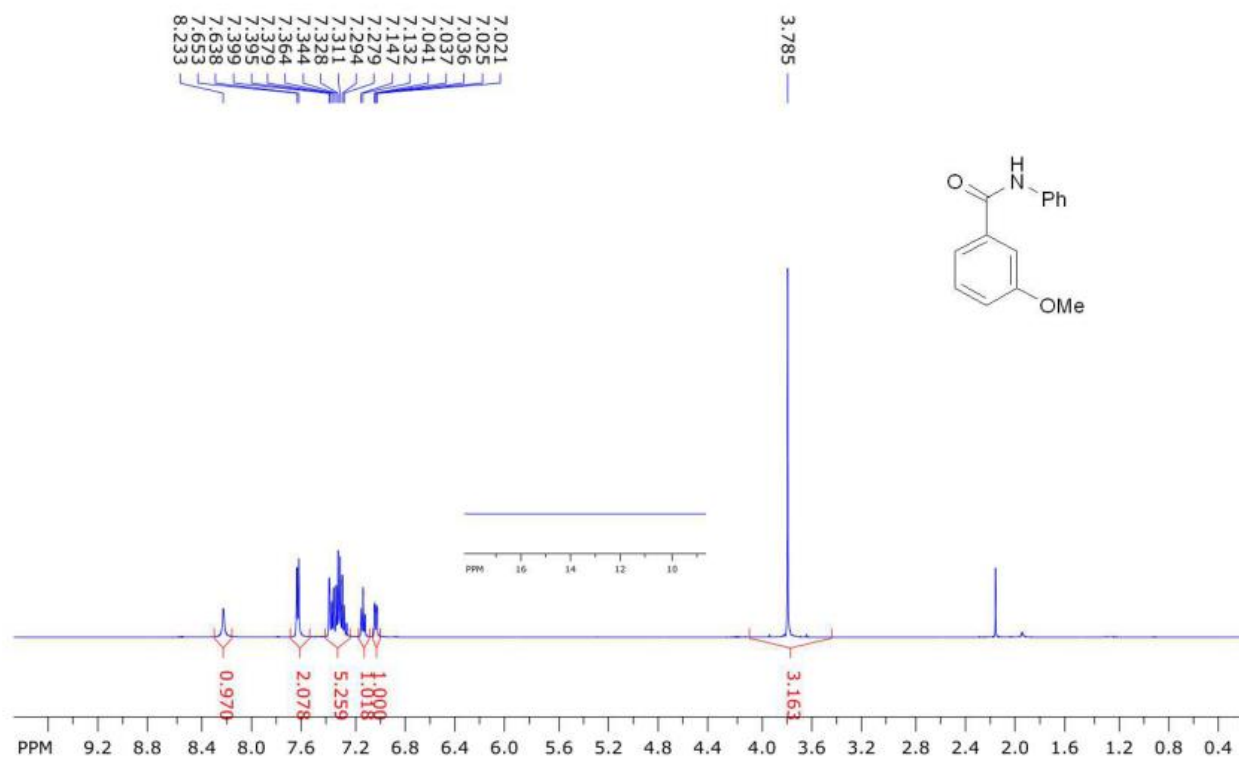

file: D:\NAPO\NMR\500-2\mkr23004\17\fid expt: <zg30>  
 transmitter freq.: 500.133001 MHz  
 time domain size: 65536 points  
 width: 12335.53 Hz = 24.6645 ppm = 0.188225 Hz/pt  
 number of scans: 24

freq. of 0 ppm: 500.130022 MHz  
 processed size: 65536 complex points  
 LB: 0.300 GF: 0.0000  
 Hz/cm: 194.652 ppm/cm: 0.38920

# Compound 5f (NMR in CDCl<sub>3</sub>)

SpinWorks 4: IVA 2381 13C CDCl<sub>3</sub>

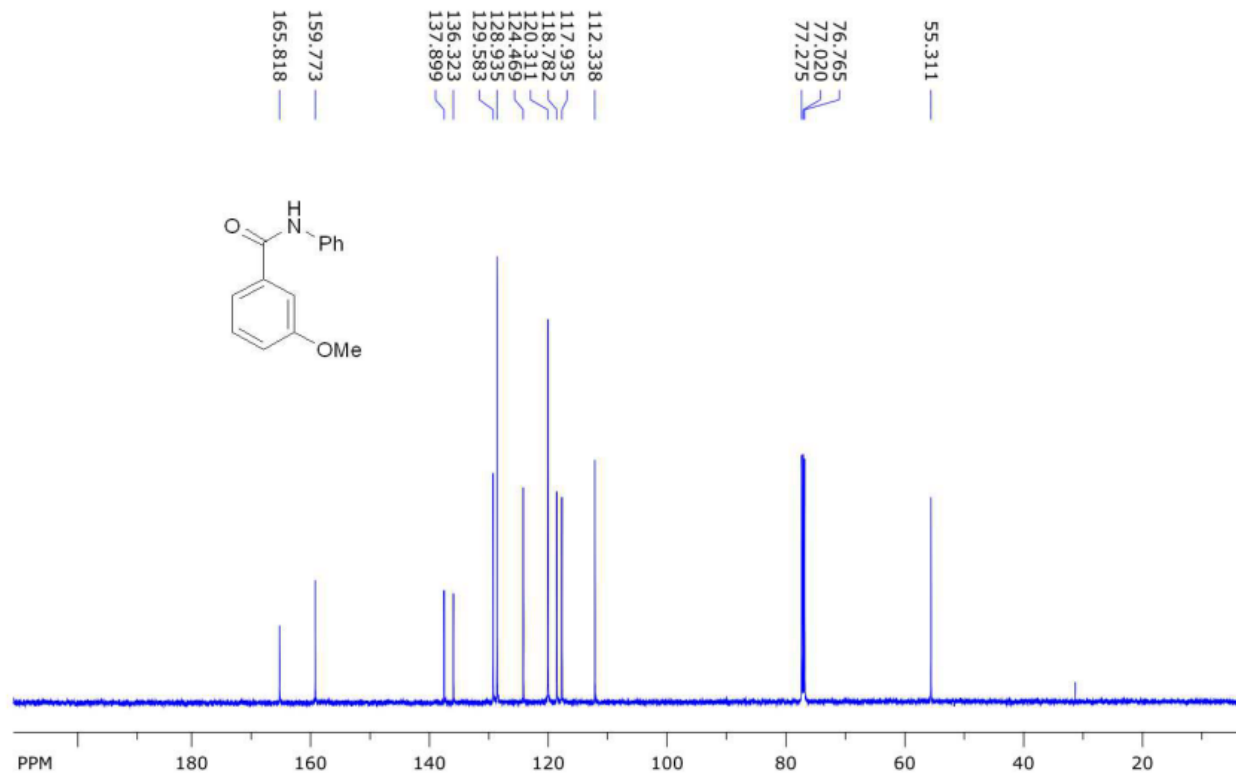

file: D:\NAPO\NMR\500-2\mkr23004\18\fid expt: <zpgp30>  
 transmitter freq.: 125.772879 MHz  
 time domain size: 65536 points  
 width: 36057.69 Hz = 286.6889 ppm = 0.550197 Hz/pt  
 number of scans: 512

freq. of 0 ppm: 125.757803 MHz  
 processed size: 32768 complex points  
 LB: 2.000 GF: 0.0000  
 Hz/cm: 1051.958 ppm/cm: 8.36395

# Compound 5g (NMR in DMSO-*d*<sub>6</sub>)

SpinWorks 4: IVA 1662 1H DMSO

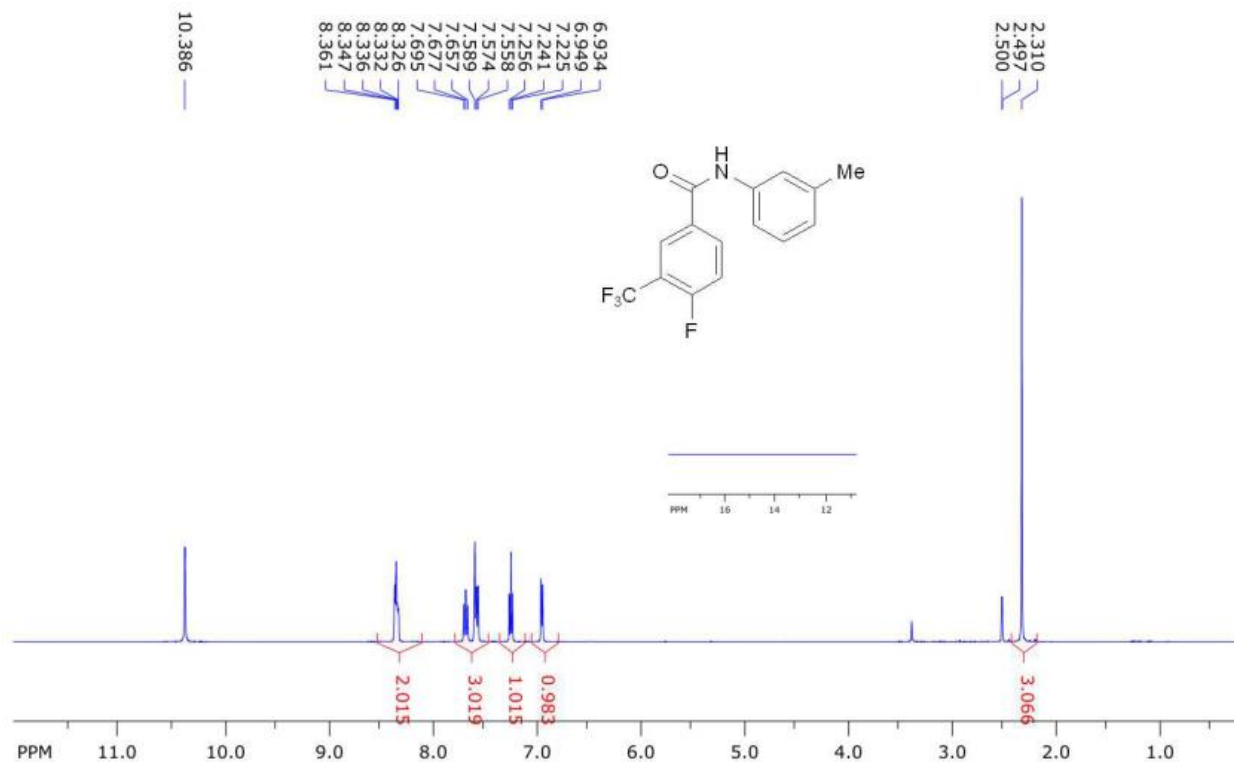

file: D:\NAPO\NMR\500-2\mkr10802\13\fid expt: <zg30>  
 transmitter freq.: 500.133001 MHz  
 time domain size: 65536 points  
 width: 12335.53 Hz = 24.6645 ppm = 0.188225 Hz/pt  
 number of scans: 24

freq. of 0 ppm: 500.130005 MHz  
 processed size: 65536 complex points  
 LB: 0.300 GF: 0.0000  
 Hz/cm: 237.657 ppm/cm: 0.47519

# Compound 5g (NMR in DMSO-*d*<sub>6</sub>)

SpinWorks 4: IVA 1662 13C DMSO

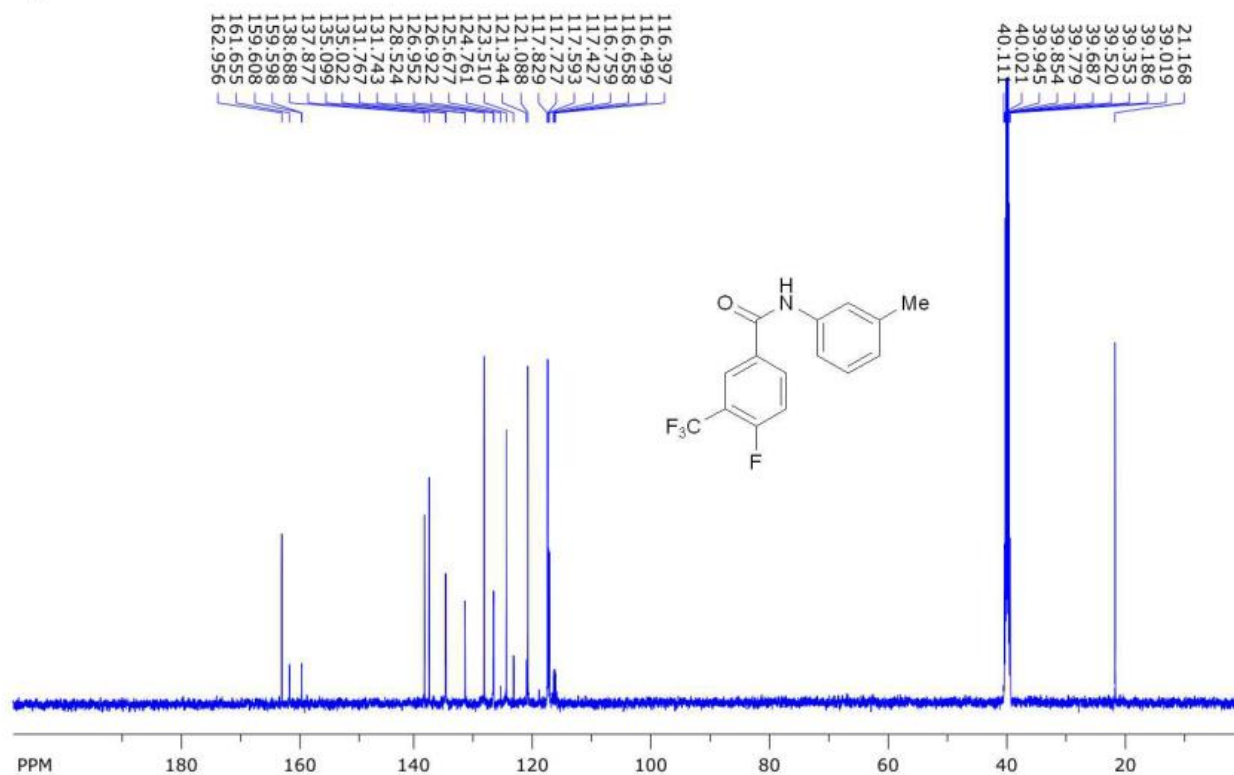

file: D:\NAPO\NMR\500-2\mkr10802\14\fid expt: <zpgp30>  
 transmitter freq.: 125.772879 MHz  
 time domain size: 65536 points  
 width: 36057.69 Hz = 286.6889 ppm = 0.550197 Hz/pt  
 number of scans: 512

freq. of 0 ppm: 125.757841 MHz  
 processed size: 32768 complex points  
 LB: 2.000 GF: 0.0000  
 Hz/cm: 1053.612 ppm/cm: 8.37710

# Compound 5f (NMR in CDCl<sub>3</sub>)

SpinWorks 4: IVA 1440 1H CDCl<sub>3</sub>

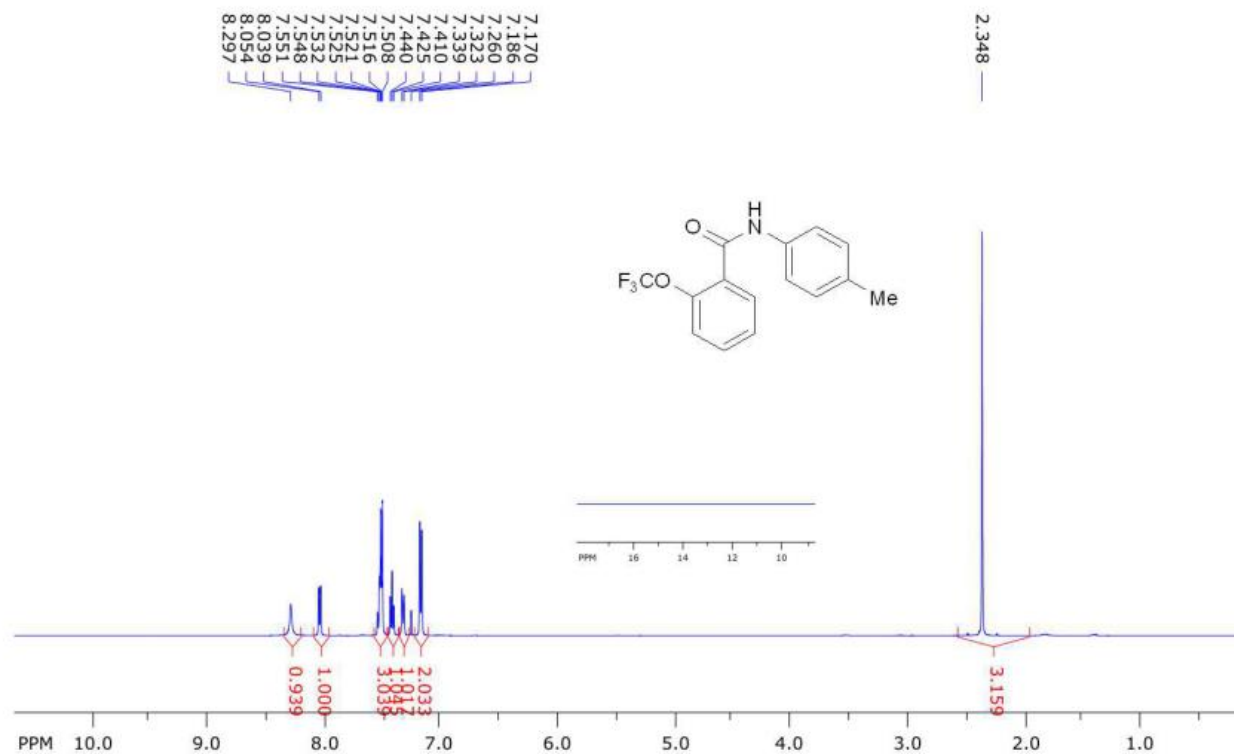

file: D:\NAPO\NMR\500-2\mkr11712\1\fid expt: <zg30>  
 transmitter freq.: 500.133001 MHz  
 time domain size: 65536 points  
 width: 12335.53 Hz = 24.6645 ppm = 0.188225 Hz/pt  
 number of scans: 24

freq. of 0 ppm: 500.130023 MHz  
 processed size: 65536 complex points  
 LB: 0.300 GF: 0.0000  
 Hz/cm: 211.628 ppm/cm: 0.42314

# Compound 5h (NMR in CDCl<sub>3</sub>)

SpinWorks 4: IVA 1440 1H CDCl<sub>3</sub>

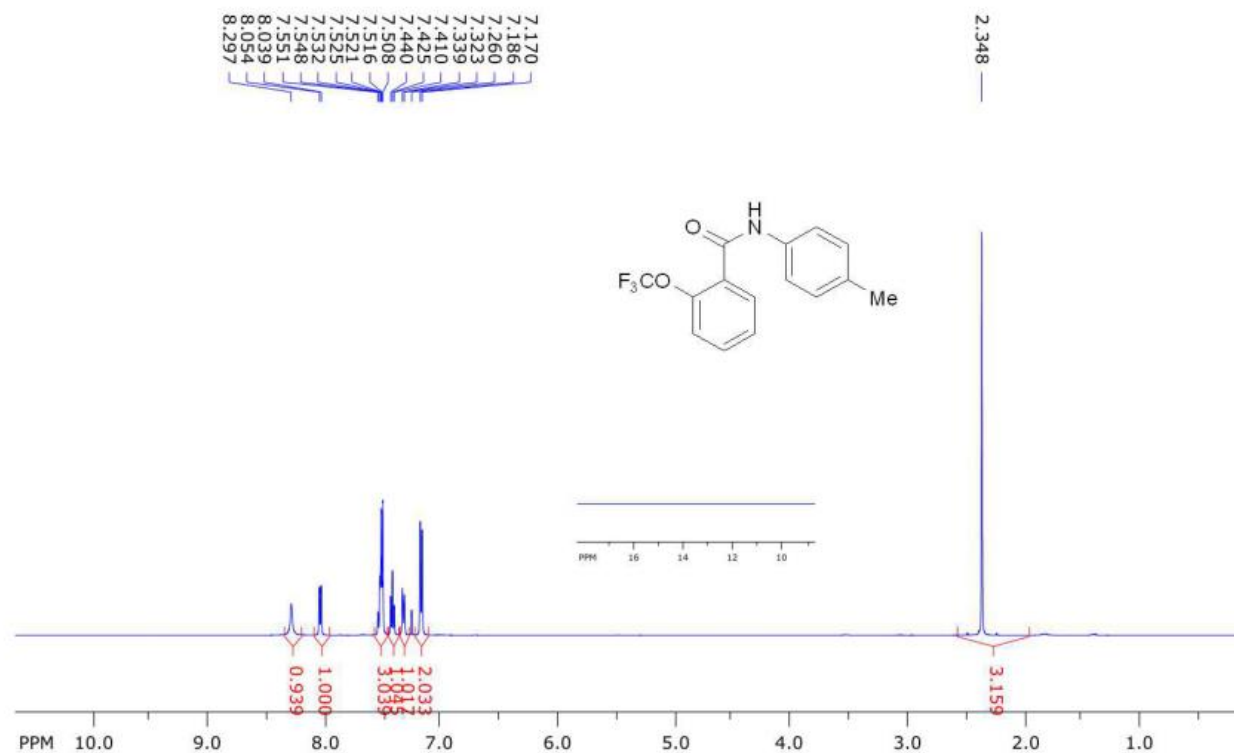

file: D:\NAPO\NMR\500-2\mkr11712\1\fid expt: <zg30>  
 transmitter freq.: 500.133001 MHz  
 time domain size: 65536 points  
 width: 12335.53 Hz = 24.6645 ppm = 0.188225 Hz/pt  
 number of scans: 24

freq. of 0 ppm: 500.130023 MHz  
 processed size: 65536 complex points  
 LB: 0.300 GF: 0.0000  
 Hz/cm: 211.628 ppm/cm: 0.42314

# Compound 5h (NMR in CDCl<sub>3</sub>)

SpinWorks 4: IVA 1440 13C CDCl<sub>3</sub>

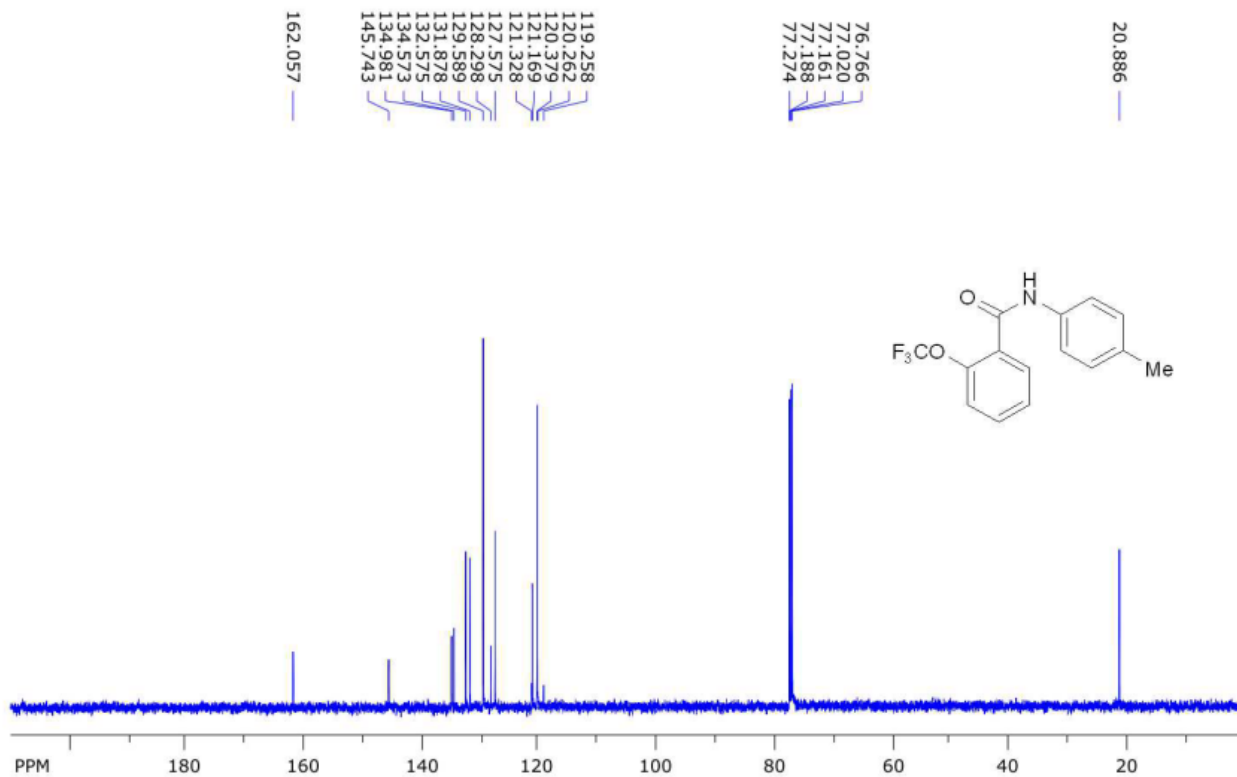

file: D:\NAPO\NMR\500-2\mkr11712\2\fid expt: <zpgg30>  
 transmitter freq.: 125.772879 MHz  
 time domain size: 65536 points  
 width: 36057.69 Hz = 286.6889 ppm = 0.550197 Hz/pt  
 number of scans: 140

freq. of 0 ppm: 125.757796 MHz  
 processed size: 32768 complex points  
 LB: 2.000 GF: 0.0000  
 Hz/cm: 1061.882 ppm/cm: 8.44286

# Compound 5i (NMR in CDCl<sub>3</sub>)

SpinWorks 4: IVA 1438 1H CDCl<sub>3</sub>

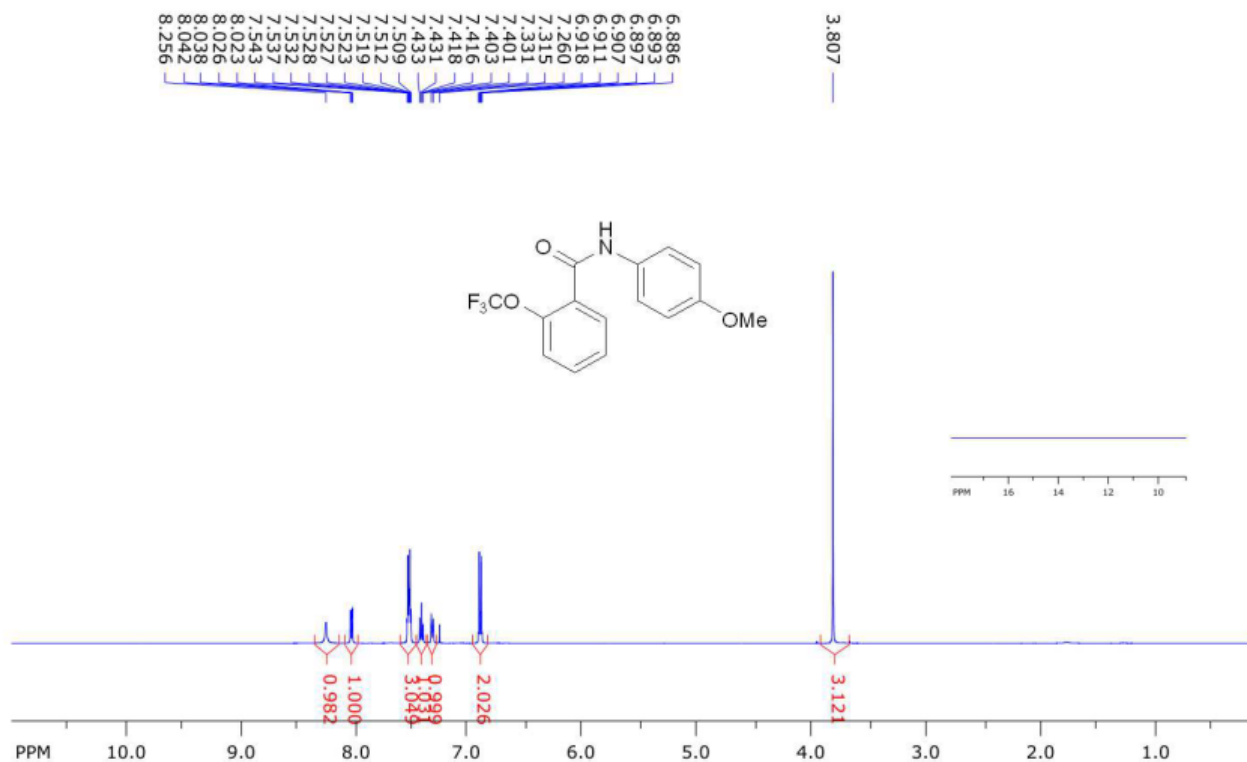

file: D:\NAPO\NMR\500-2\mkr12812\15\fid expt: <zg30>  
 transmitter freq.: 500.133001 MHz  
 time domain size: 65536 points  
 width: 12335.53 Hz = 24.6645 ppm = 0.188225 Hz/pt  
 number of scans: 24

freq. of 0 ppm: 500.130023 MHz  
 processed size: 65536 complex points  
 LB: 0.300 GF: 0.0000  
 Hz/cm: 218.418 ppm/cm: 0.43672

# Compound 5i (NMR in CDCl<sub>3</sub>)

SpinWorks 4: IVA 1438 13C CDCl<sub>3</sub>

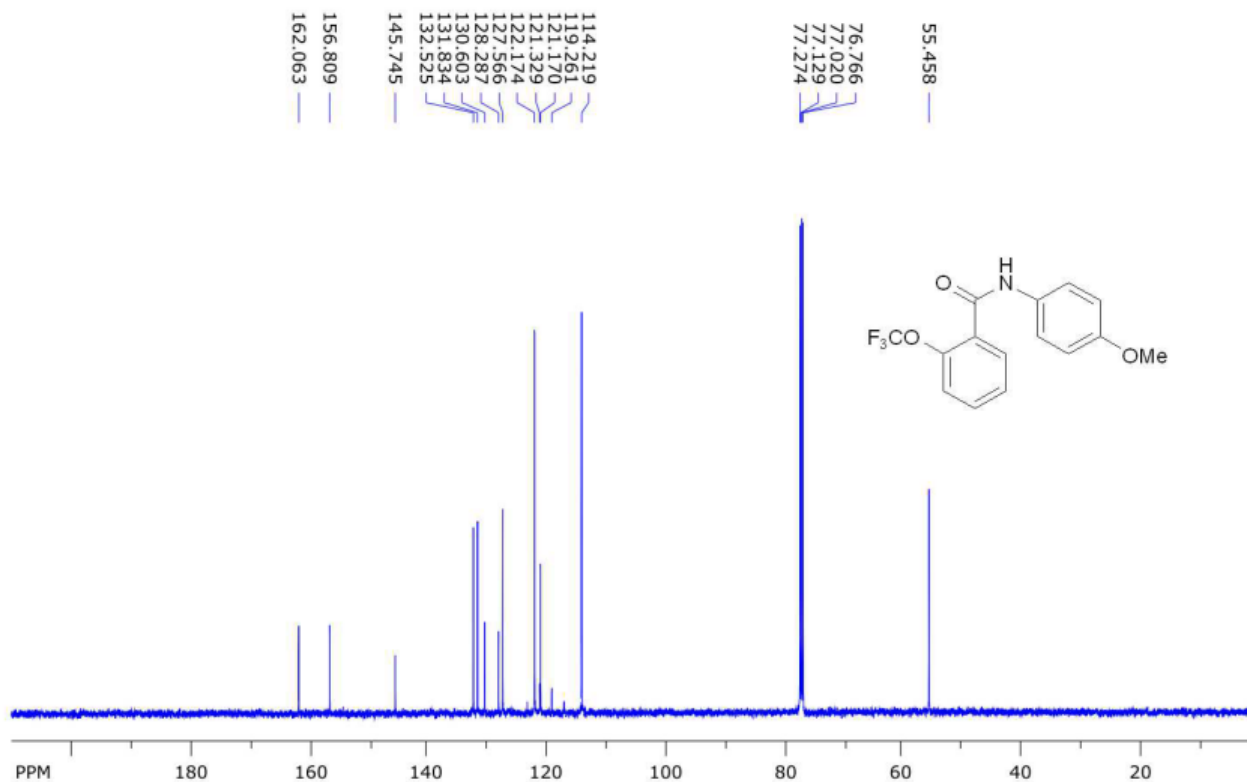

file: D:\NAPO\NMR\500-2\mkr12812\16\fid expt: <zgpg30>  
 transmitter freq.: 125.772879 MHz  
 time domain size: 65536 points  
 width: 36057.69 Hz = 286.6889 ppm = 0.550197 Hz/pt  
 number of scans: 512

freq. of 0 ppm: 125.757796 MHz  
 processed size: 32768 complex points  
 LB: 2.000 GF: 0.0000  
 Hz/cm: 1058.574 ppm/cm: 8.41656

# Compound 5j (NMR in CDCl<sub>3</sub>)

SpinWorks 4: IVA 1437 1H

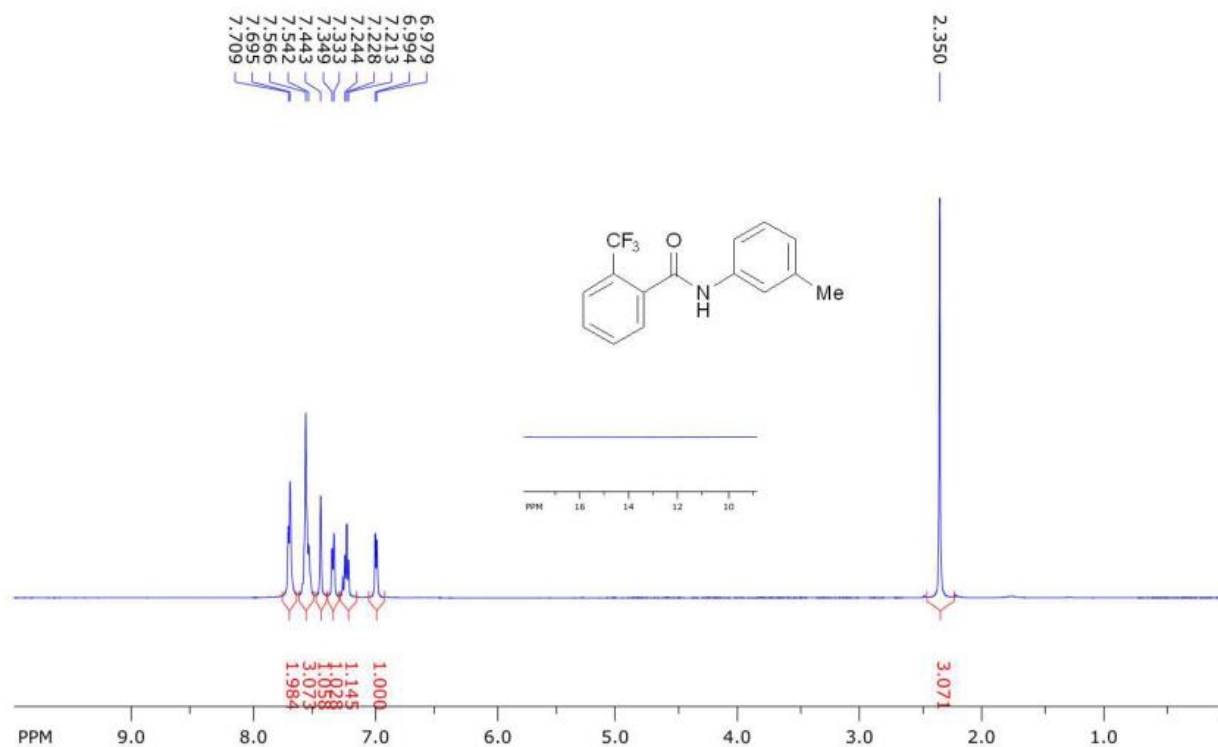

file: D:\NAPO\NMR\500-2\mkr12812\23\fid expt: <zg30>  
 transmitter freq.: 500.133001 MHz  
 time domain size: 65536 points  
 width: 12335.53 Hz = 24.6645 ppm = 0.188225 Hz/pt  
 number of scans: 24

freq. of 0 ppm: 500.130022 MHz  
 processed size: 65536 complex points  
 LB: 0.300 GF: 0.0000  
 Hz/cm: 200.316 ppm/cm: 0.40053

# Compound 5j (NMR in CDCl<sub>3</sub>)

SpinWorks 4: IVA 1437 13C

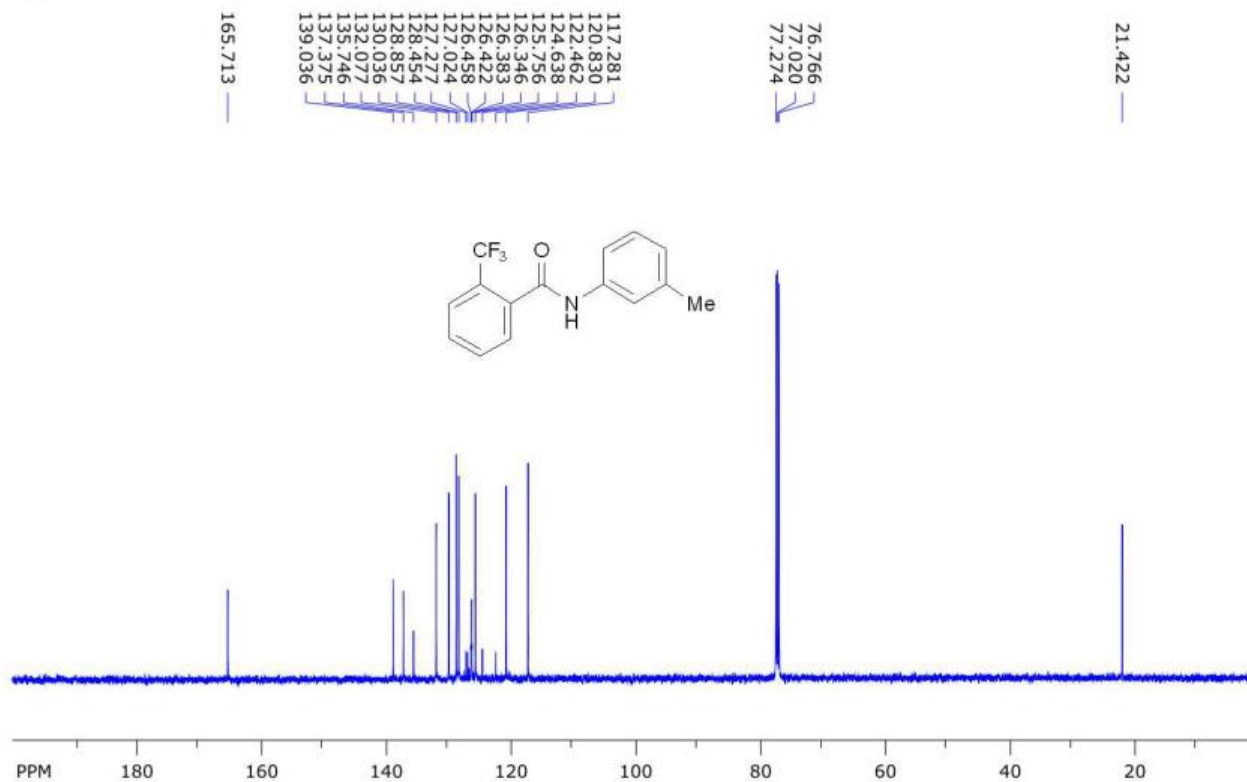

file: D:\NAPO\NMR\500-2\mkr12812\24\fid exp: <zgpg30>  
 transmitter freq.: 125.772879 MHz  
 time domain size: 65536 points  
 width: 36057.69 Hz = 286.6889 ppm = 0.550197 Hz/pt  
 number of scans: 512

freq. of 0 ppm: 125.757798 MHz  
 processed size: 32768 complex points  
 LB: 2.000 GF: 0.0000  
 Hz/cm: 1008.339 ppm/cm: 8.01714

# Compound 5k (NMR in CDCl<sub>3</sub>)

SpinWorks 4: IVA 1433 1H CDCl<sub>3</sub>

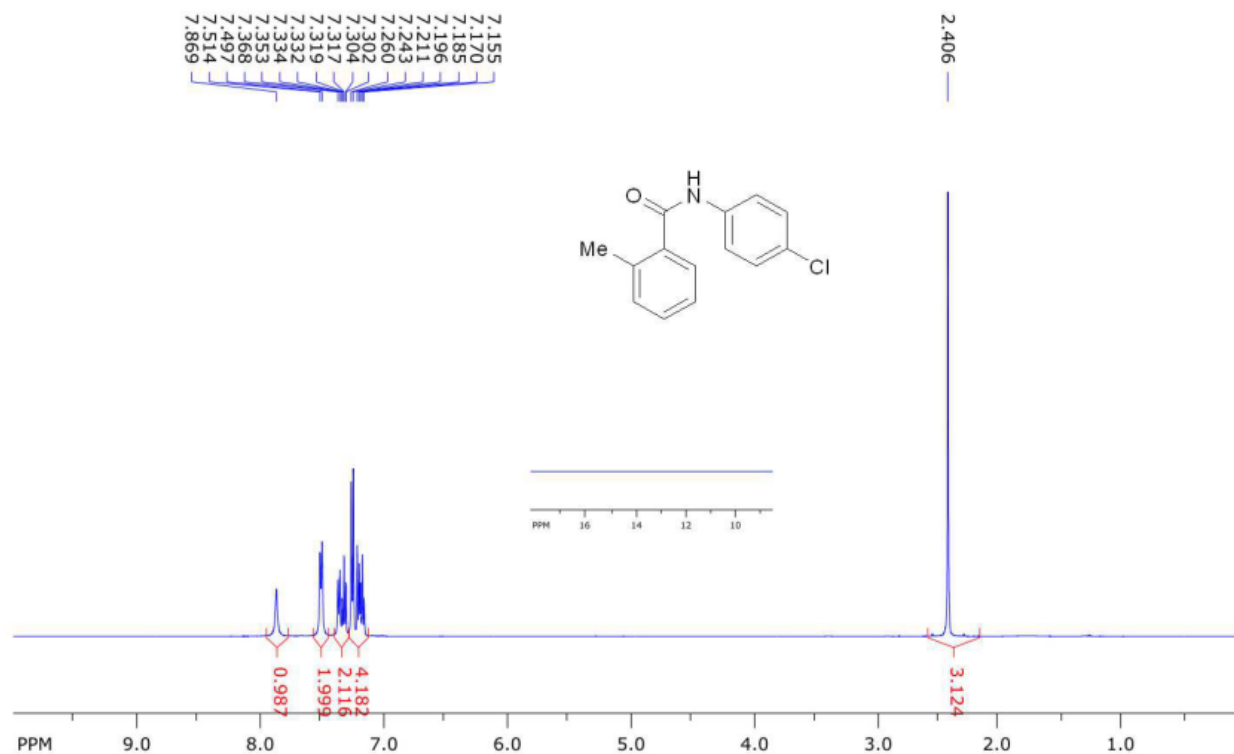

file: D:\NAPO\NMR\500-2\mkr12812\25\fid expt: <zg30>  
 transmitter freq.: 500.133001 MHz  
 time domain size: 65536 points  
 width: 12335.53 Hz = 24.6645 ppm = 0.188225 Hz/pt  
 number of scans: 24

freq. of 0 ppm: 500.130032 MHz  
 processed size: 65536 complex points  
 LB: 0.300 GF: 0.0000  
 Hz/cm: 200.311 ppm/cm: 0.40052

# Compound 5k (NMR in CDCl<sub>3</sub>)

SpinWorks 4: IVA 1433 13C CDCl<sub>3</sub>

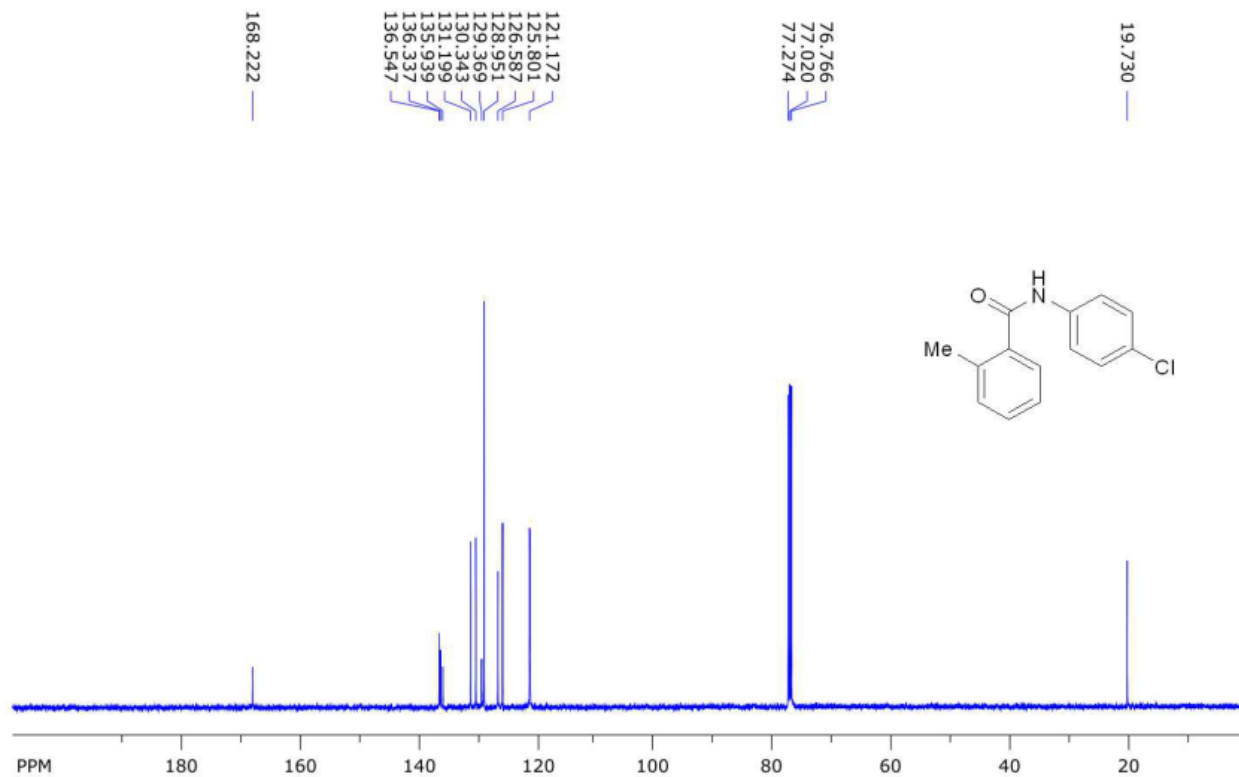

file: D:\NAPO\NMR\500-2\mkr12812\26\fid expt: <zpgp30>  
transmitter freq.: 125.772879 MHz  
time domain size: 65536 points  
width: 36057.69 Hz = 286.6889 ppm = 0.550197 Hz/pt  
number of scans: 512

freq. of 0 ppm: 125.757799 MHz  
processed size: 32768 complex points  
LB: 2.000 GF: 0.0000  
Hz/cm: 1055.266 ppm/cm: 8.39025

# Compound 5l (NMR in CDCl<sub>3</sub>)

SpinWorks 4: IVA 1441 1H

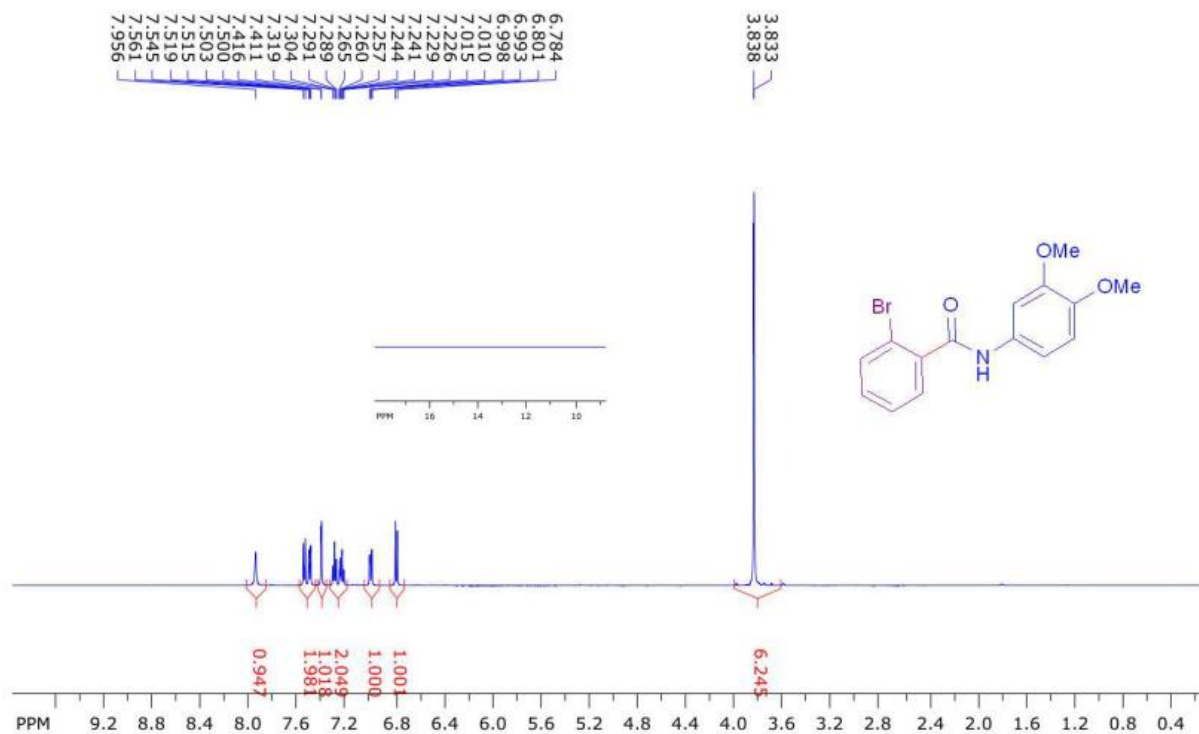

file: D:\NAPO\NMR\500-2\mkr12901\11\fid expt: <zg30>  
 transmitter freq.: 500.133001 MHz  
 time domain size: 65536 points  
 width: 12335.53 Hz = 24.6645 ppm = 0.188225 Hz/pt  
 number of scans: 12

freq. of 0 ppm: 500.130020 MHz  
 processed size: 65536 complex points  
 LB: 0.300 GF: 0.0000  
 Hz/cm: 198.133 ppm/cm: 0.39616

# Compound 51 (NMR in CDCl<sub>3</sub>)

SpinWorks 4: IVA 1441 13C

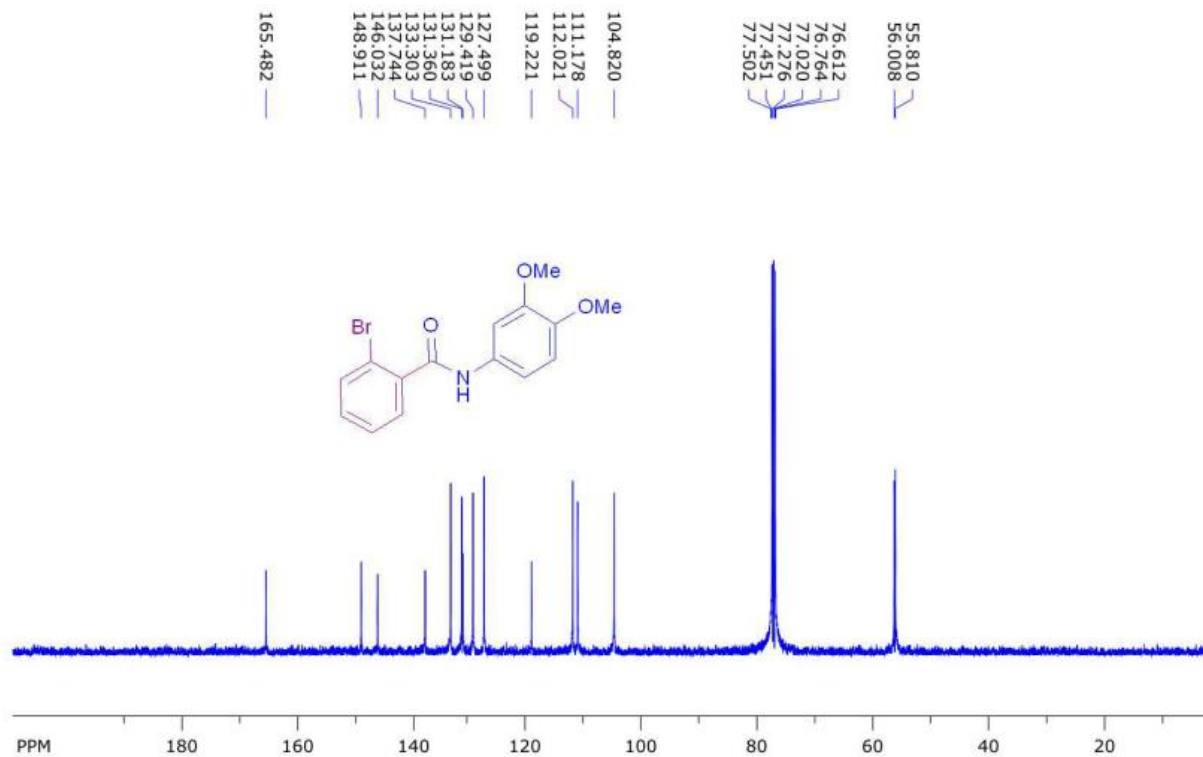

file: D:\NAPO\NMR\500-2\mkr12901\12\fid expt: <zpgg30>  
 transmitter freq.: 125.772879 MHz  
 time domain size: 65536 points  
 width: 36057.69 Hz = 286.6889 ppm = 0.550197 Hz/pt  
 number of scans: 80

freq. of 0 ppm: 125.757803 MHz  
 processed size: 32768 complex points  
 LB: 2.000 GF: 0.0000  
 Hz/cm: 1054.608 ppm/cm: 8.38502

# Compound 5m (NMR in CDCl<sub>3</sub>)

SpinWorks 4: IVA 1384 1H CDCl<sub>3</sub>

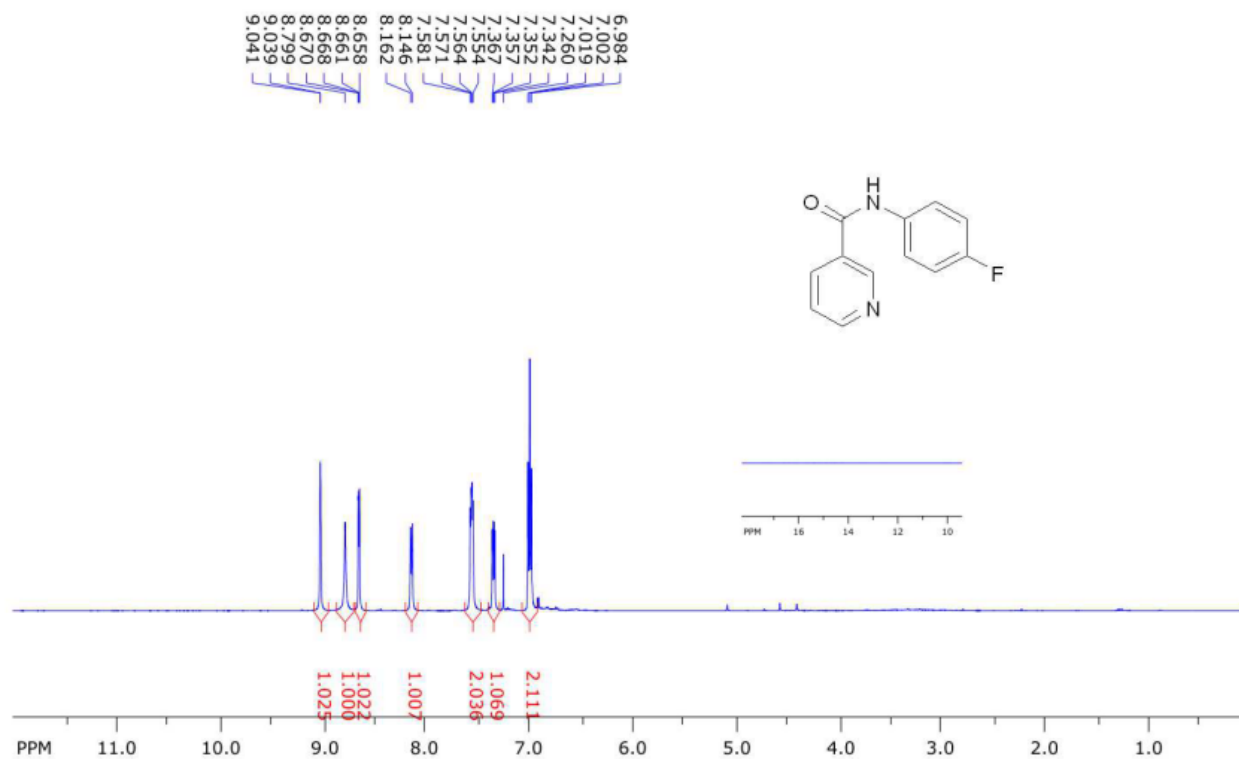

file: D:\NAPO\NMR\500-2\mkr11112\29\fid expt: <zg30>  
 transmitter freq.: 500.133001 MHz  
 time domain size: 65536 points  
 width: 12335.53 Hz = 24.6645 ppm = 0.188225 Hz/pt  
 number of scans: 24

freq. of 0 ppm: 500.130023 MHz  
 processed size: 65536 complex points  
 LB: 0.300 GF: 0.0000  
 Hz/cm: 240.486 ppm/cm: 0.48084

# Compound 5m (NMR in CDCl<sub>3</sub>)

SpinWorks 4: IVA 1384 13C CDCl<sub>3</sub>

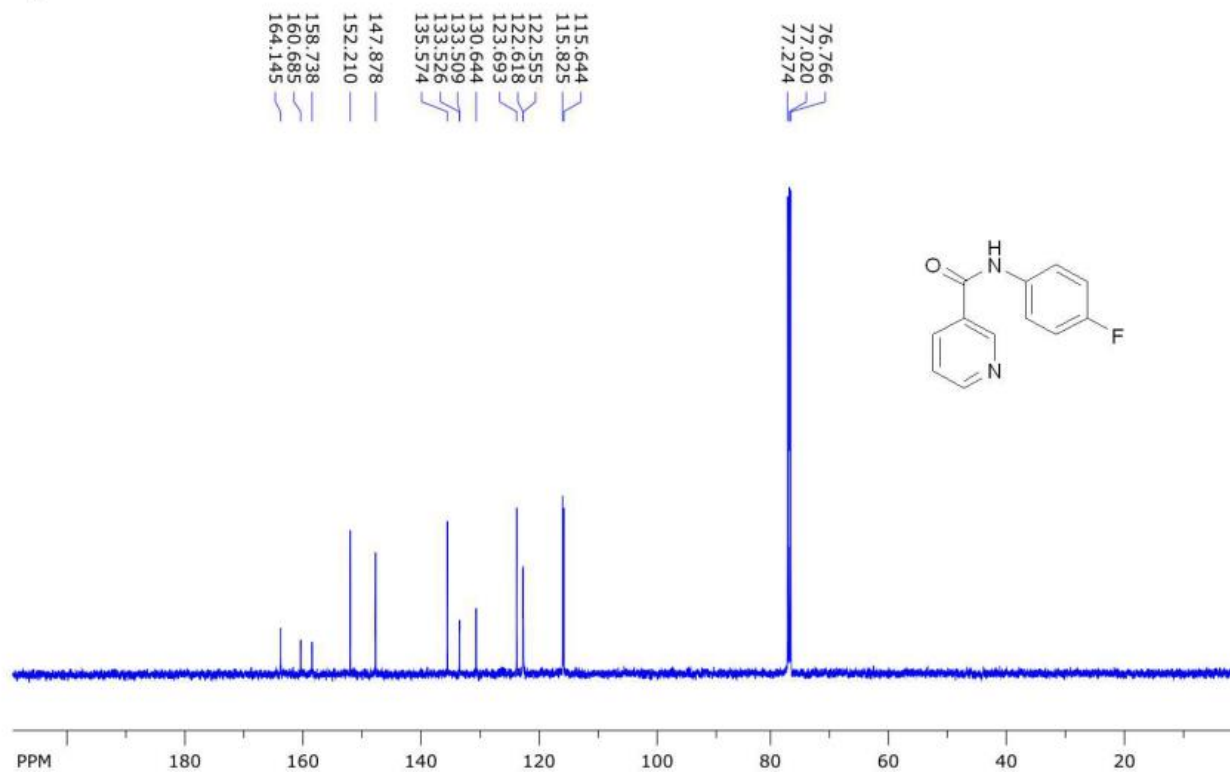

file: D:\NAPO\NMR\500-2\mkr11112\30\fid expt: <zpgg30>  
 transmitter freq.: 125.772879 MHz  
 time domain size: 65536 points  
 width: 36057.69 Hz = 286.6889 ppm = 0.550197 Hz/pt  
 number of scans: 256

freq. of 0 ppm: 125.757797 MHz  
 processed size: 32768 complex points  
 LB: 2.000 GF: 0.0000  
 Hz/cm: 1055.266 ppm/cm: 8.39025

# Compound 5n (NMR in CDCl<sub>3</sub>)

SpinWorks 4: IVA 1412 1H CDCl<sub>3</sub>

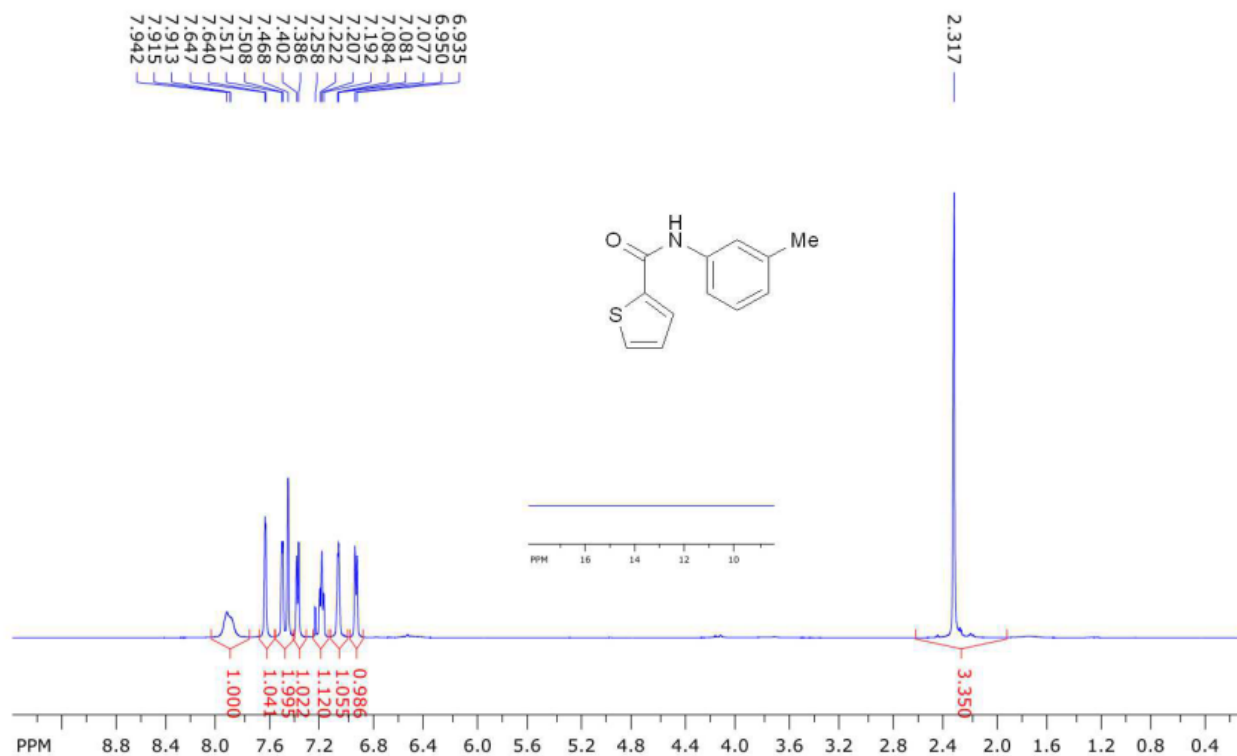

file: D:\NAPO\NMR\500-2\mkr13001\11\fid expt: <zg30>  
transmitter freq.: 500.133001 MHz  
time domain size: 65536 points  
width: 12335.53 Hz = 24.6645 ppm = 0.188225 Hz/pt  
number of scans: 24

freq. of 0 ppm: 500.130024 MHz  
processed size: 65536 complex points  
LB: 0.300 GF: 0.0000  
Hz/cm: 190.691 ppm/cm: 0.38128

# Compound 5n (NMR in CDCl<sub>3</sub>)

SpinWorks 4: IVA 1412 13C CDCl<sub>3</sub>

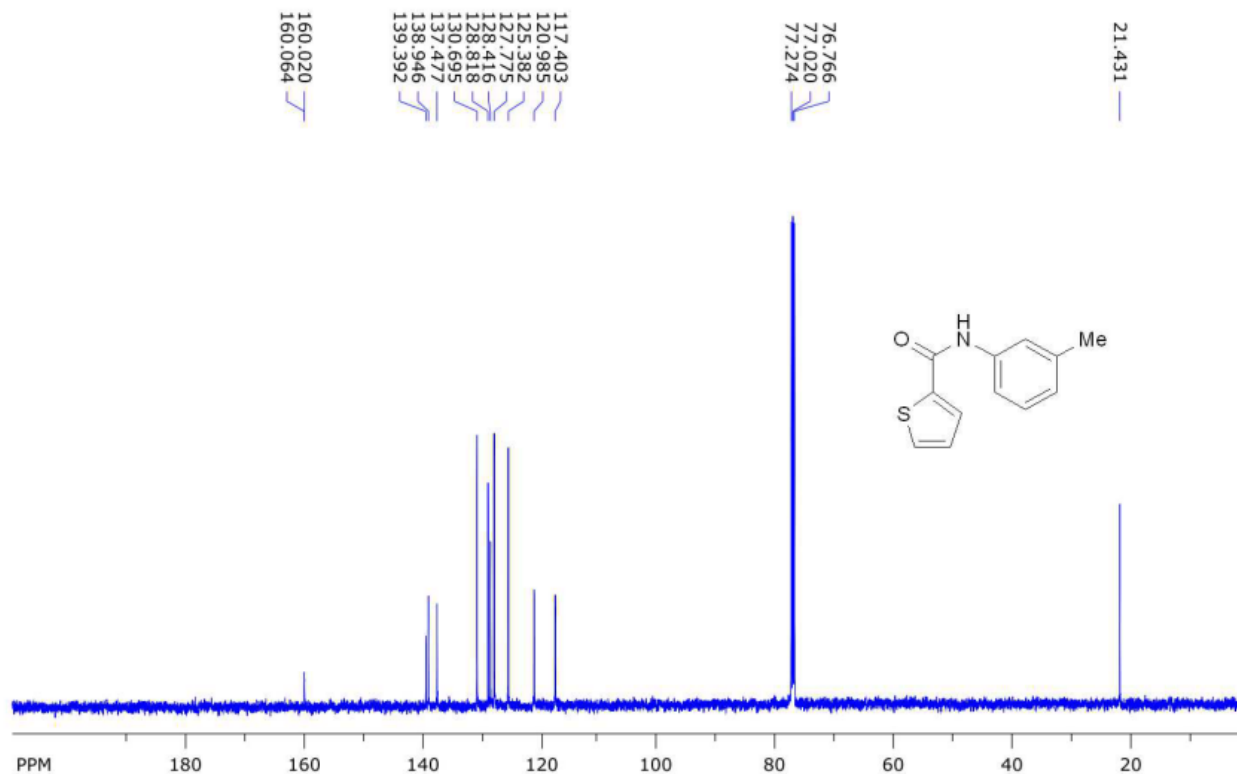

file: D:\NAPO\NMR\500-2\mkr13001\12\fid expt: <zpgpg30>  
 transmitter freq.: 125.772879 MHz  
 time domain size: 65536 points  
 width: 36057.69 Hz = 286.6889 ppm = 0.550197 Hz/pt  
 number of scans: 512

freq. of 0 ppm: 125.757798 MHz  
 processed size: 32768 complex points  
 LB: 2.000 GF: 0.0000  
 Hz/cm: 1053.612 ppm/cm: 8.37710

# Compound 5o (NMR in DMSO-*d*<sub>6</sub>)

SpinWorks 4: IVA 1985 1H DMSO

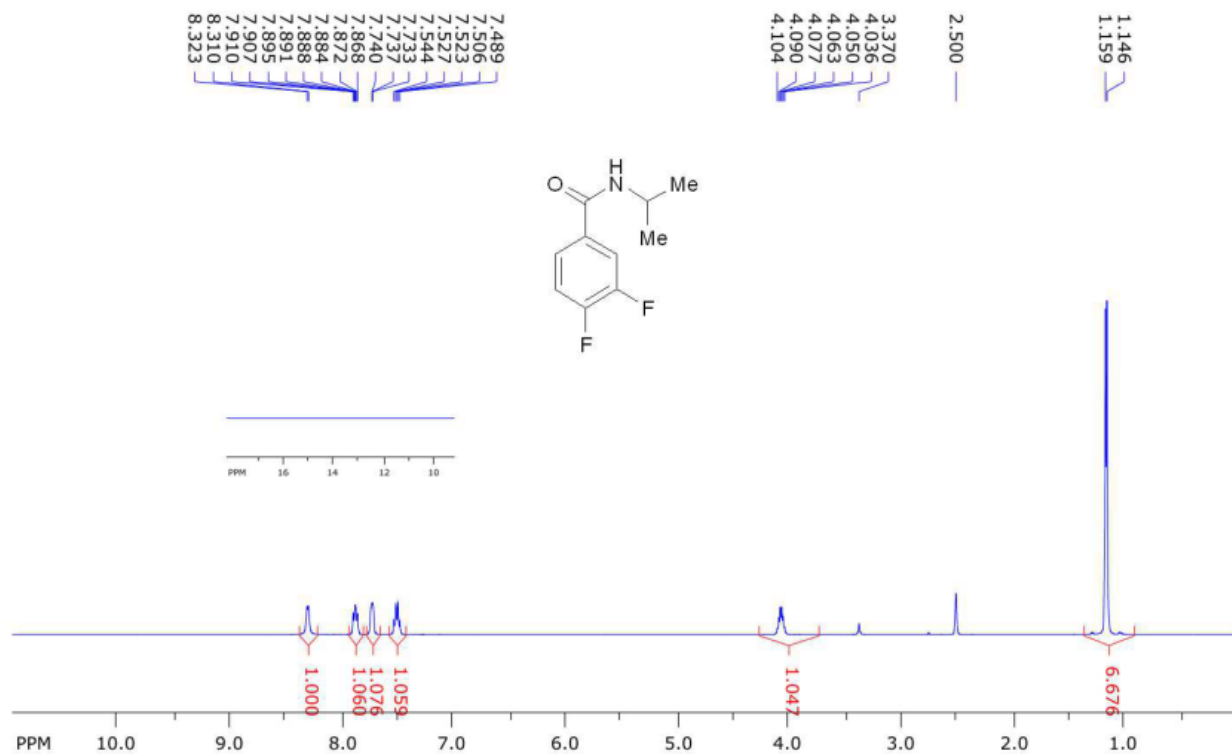

file: D:\NAPO\NMR\500-2\mkr11802\25\fid expt: <zg30>  
 transmitter freq.: 500.133001 MHz  
 time domain size: 65536 points  
 width: 12335.53 Hz = 24.6645 ppm = 0.188225 Hz/pt  
 number of scans: 24

freq. of 0 ppm: 500.130005 MHz  
 processed size: 65536 complex points  
 LB: 0.300 GF: 0.0000  
 Hz/cm: 220.681 ppm/cm: 0.44125

# Compound 5o (NMR in DMSO-*d*<sub>6</sub>)

SpinWorks 4: IVA 1985 13C DMSO

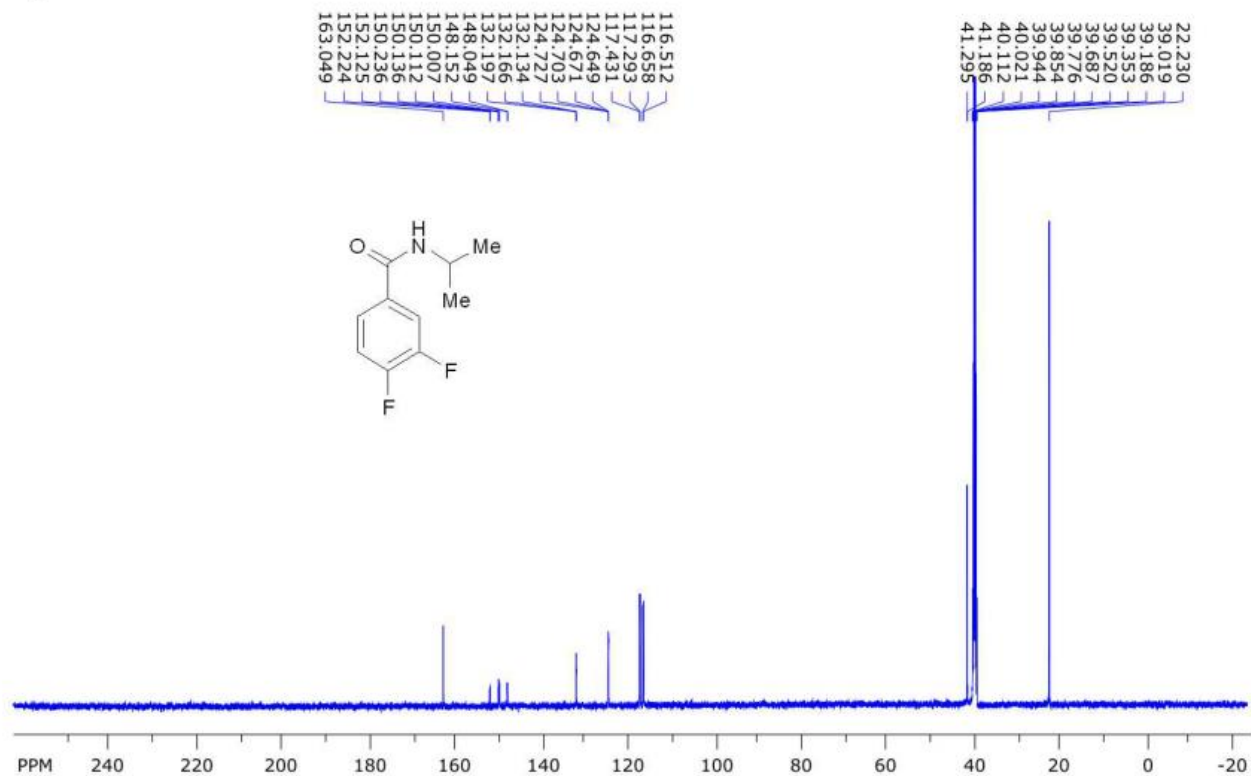

file: D:\NAPO\NMR\500-2\mkr11802\26\fid expt: <zpgg30>  
 transmitter freq.: 125.772879 MHz  
 time domain size: 65536 points  
 width: 36057.69 Hz = 286.6889 ppm = 0.550197 Hz/pt  
 number of scans: 512

freq. of 0 ppm: 125.757841 MHz  
 processed size: 32768 complex points  
 LB: 2.000 GF: 0.0000  
 Hz/cm: 1442.308 ppm/cm: 11.46756

# Compound 5p (NMR in CDCl<sub>3</sub>)

SpinWorks 4: IVA 1388 1H CDCl<sub>3</sub>

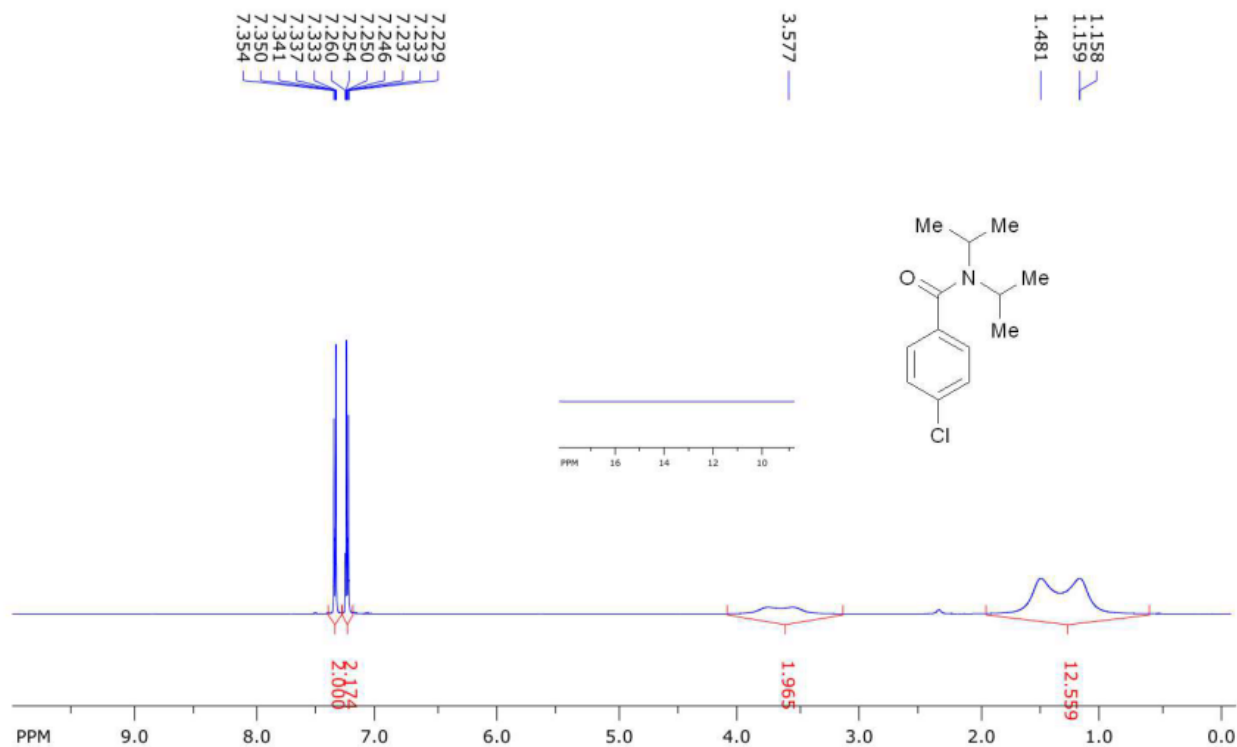

file: D:\NAPO\NMR\500-2\mkr11112\25\fid expt: <zg30>  
transmitter freq.: 500.133001 MHz  
time domain size: 65536 points  
width: 12335.53 Hz = 24.6645 ppm = 0.188225 Hz/pt  
number of scans: 24

freq. of 0 ppm: 500.130024 MHz  
processed size: 65536 complex points  
LB: 0.300 GF: 0.0000  
Hz/cm: 202.574 ppm/cm: 0.40504

# Compound 5p (NMR in CDCl<sub>3</sub>)

SpinWorks 4: IVA 1388 13C CDCl<sub>3</sub>

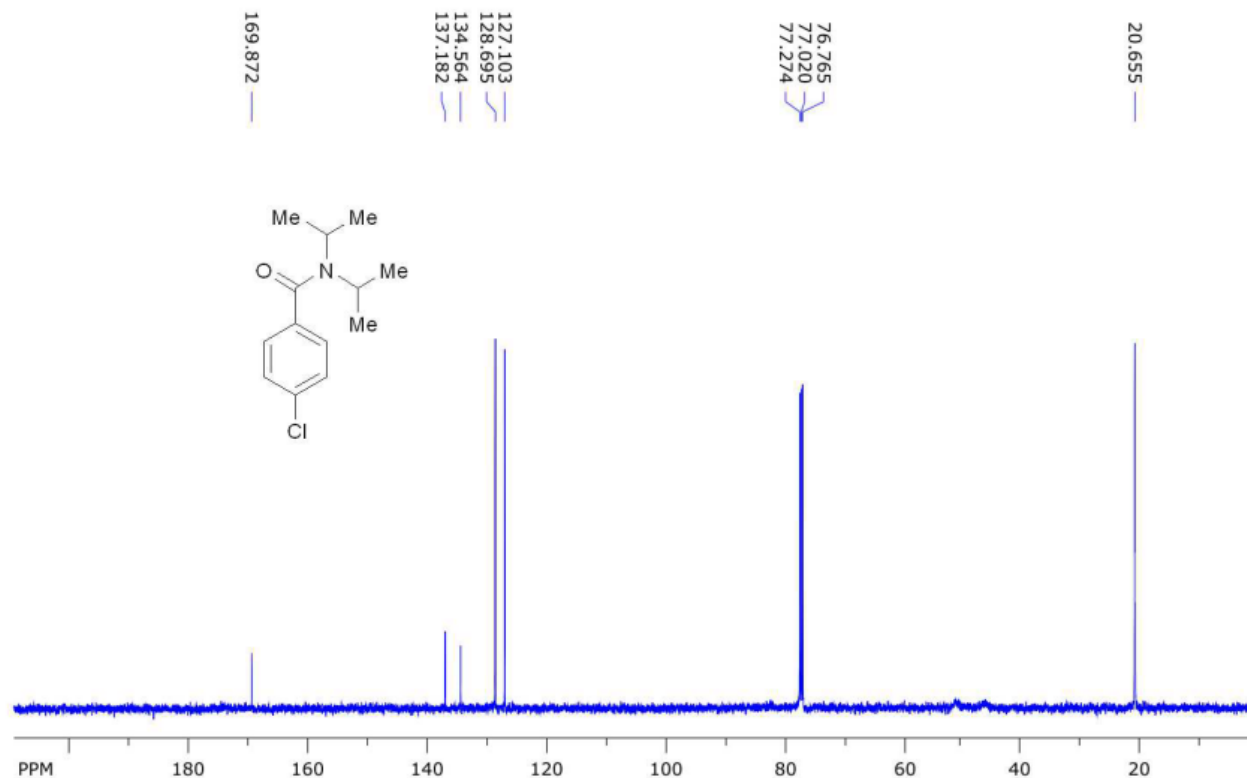

file: D:\NAPO\NMR\500-2\mkr11112\26\fid expt: <zgpg30>  
 transmitter freq.: 125.772879 MHz  
 time domain size: 65536 points  
 width: 36057.69 Hz = 286.6889 ppm = 0.550197 Hz/pt  
 number of scans: 256

freq. of 0 ppm: 125.757795 MHz  
 processed size: 32768 complex points  
 LB: 2.000 GF: 0.0000  
 Hz/cm: 1053.612 ppm/cm: 8.37710

# Compound 5q (NMR in CDCl<sub>3</sub>)

SpinWorks 4: IVA 1448 1H CDCl<sub>3</sub>

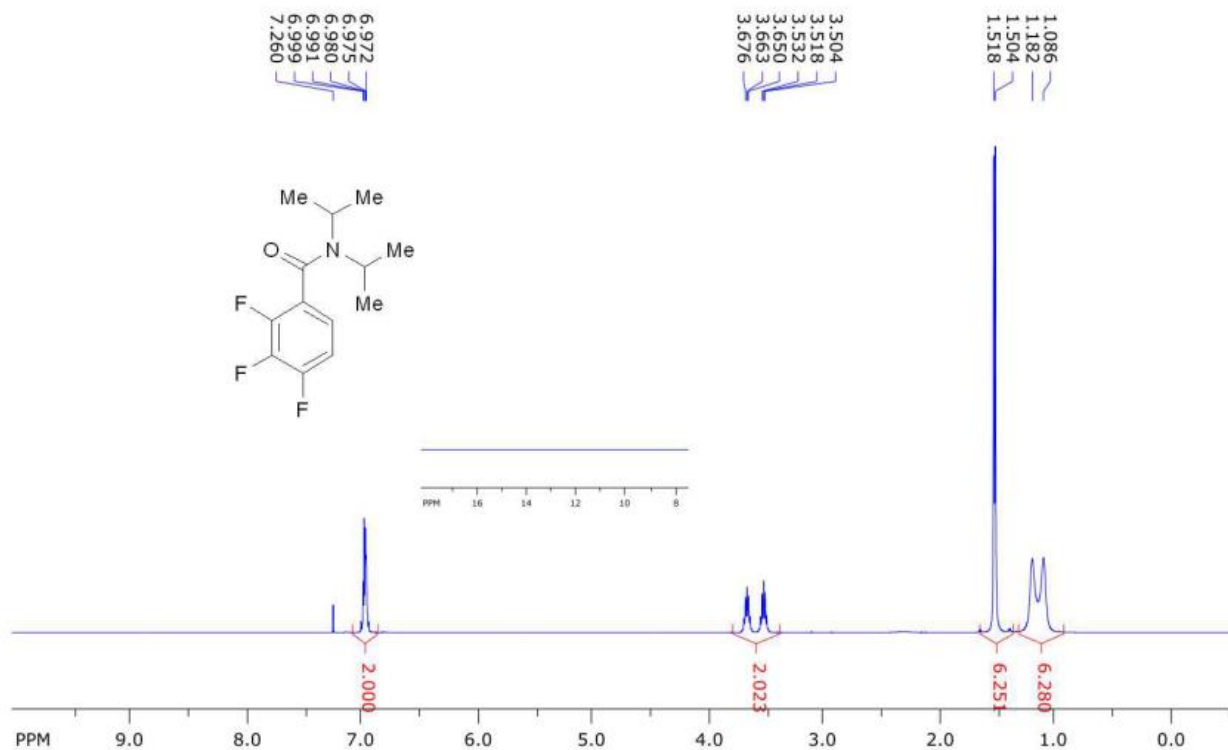

file: D:\NAPO\NMR\500-2\mkr11712\7\fid expt: <zg30>  
 transmitter freq.: 500.133001 MHz  
 time domain size: 65536 points  
 width: 12335.53 Hz = 24.6645 ppm = 0.188225 Hz/pt  
 number of scans: 24

freq. of 0 ppm: 500.130023 MHz  
 processed size: 65536 complex points  
 LB: 0.300 GF: 0.0000  
 Hz/cm: 212.760 ppm/cm: 0.42541

# Compound 5q (NMR in CDCl<sub>3</sub>)

SpinWorks 4: IVA 1448 13C CDCl<sub>3</sub>

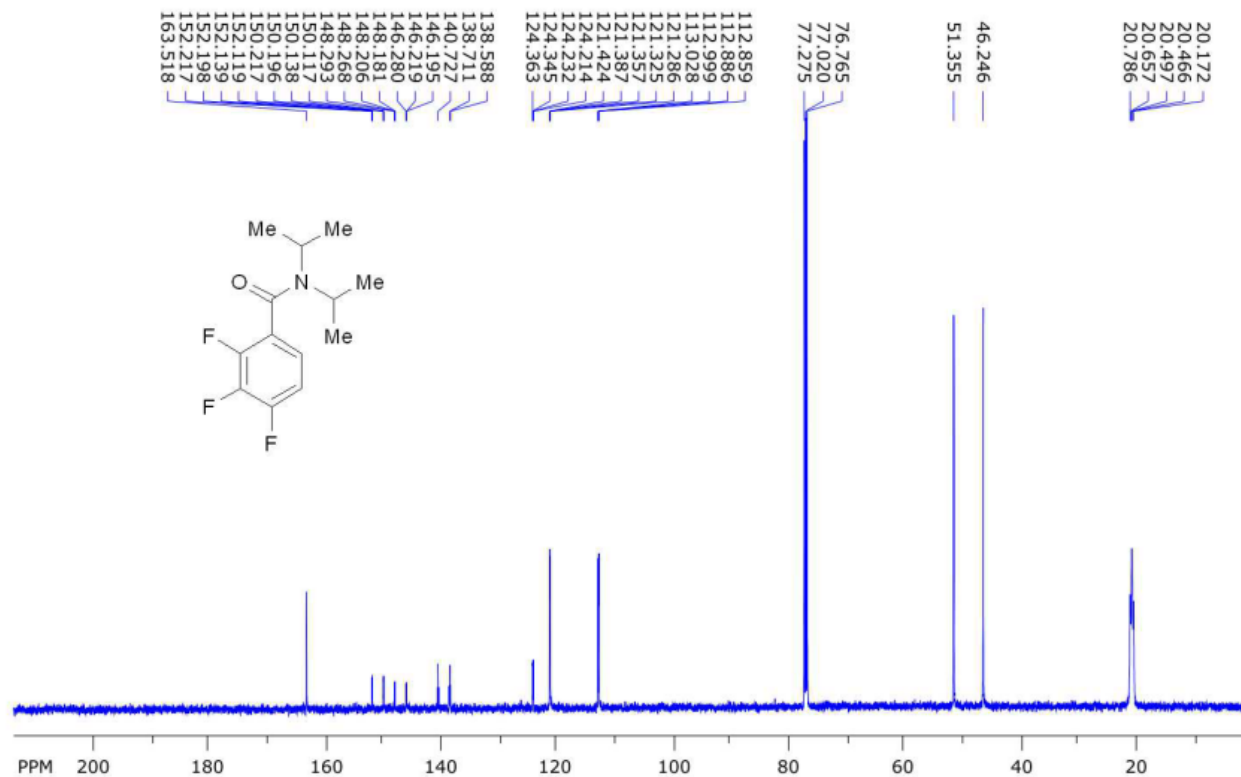

file: D:\NAPO\NMR\500-2\mkr11712\8\fid expt: <zpgg30>  
 transmitter freq.: 125.772879 MHz  
 time domain size: 65536 points  
 width: 36057.69 Hz = 286.6889 ppm = 0.550197 Hz/pt  
 number of scans: 1024

freq. of 0 ppm: 125.757795 MHz  
 processed size: 32768 complex points  
 LB: 2.000 GF: 0.0000  
 Hz/cm: 1078.423 ppm/cm: 8.57437

# Compound 5r (NMR in CDCl<sub>3</sub>)

SpinWorks 4: IVA 1446 1H CDCl<sub>3</sub>

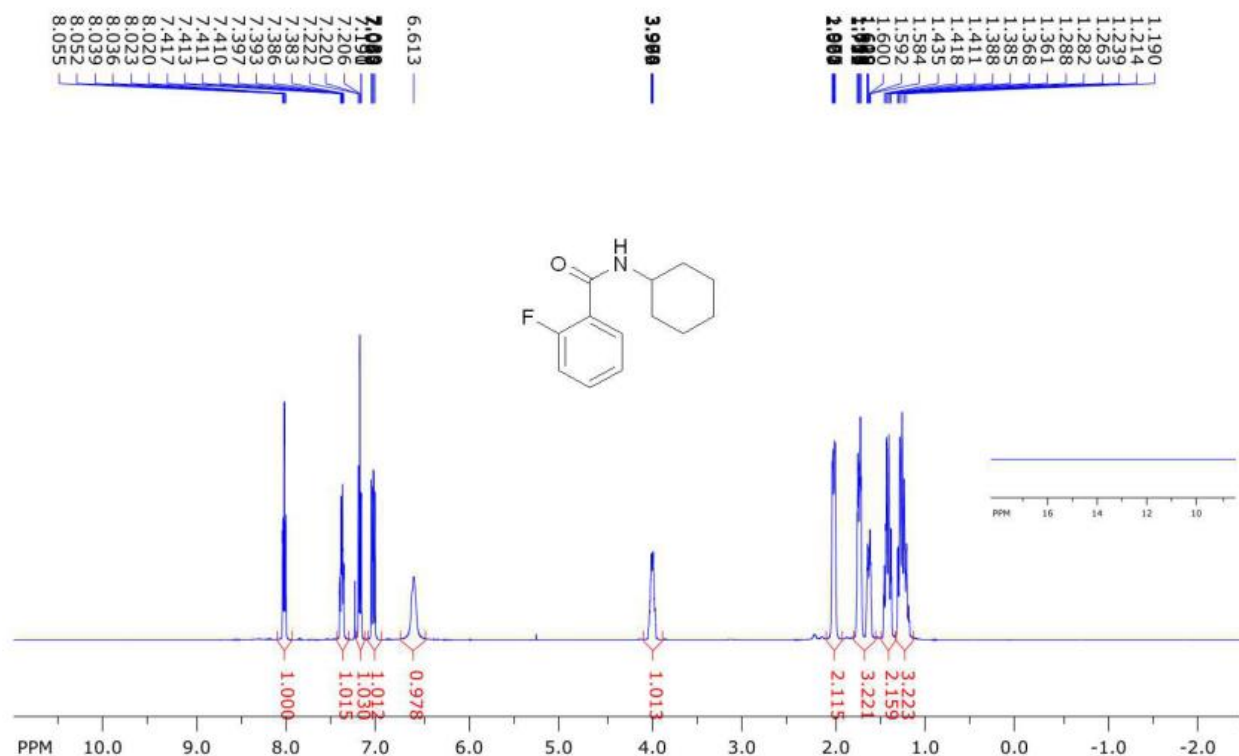

file: D:\NAPO\NMR\500-2\mkr11712\25\fid expt: <zg30>  
 transmitter freq.: 500.133001 MHz  
 time domain size: 65536 points  
 width: 12335.53 Hz = 24.6645 ppm = 0.188225 Hz/pt  
 number of scans: 24

freq. of 0 ppm: 500.130023 MHz  
 processed size: 65536 complex points  
 LB: 0.300 GF: 0.0000  
 Hz/cm: 271.608 ppm/cm: 0.54307

# Compound 5r (NMR in CDCl<sub>3</sub>)

SpinWorks 4: IVA 1446 13C CDCl<sub>3</sub>

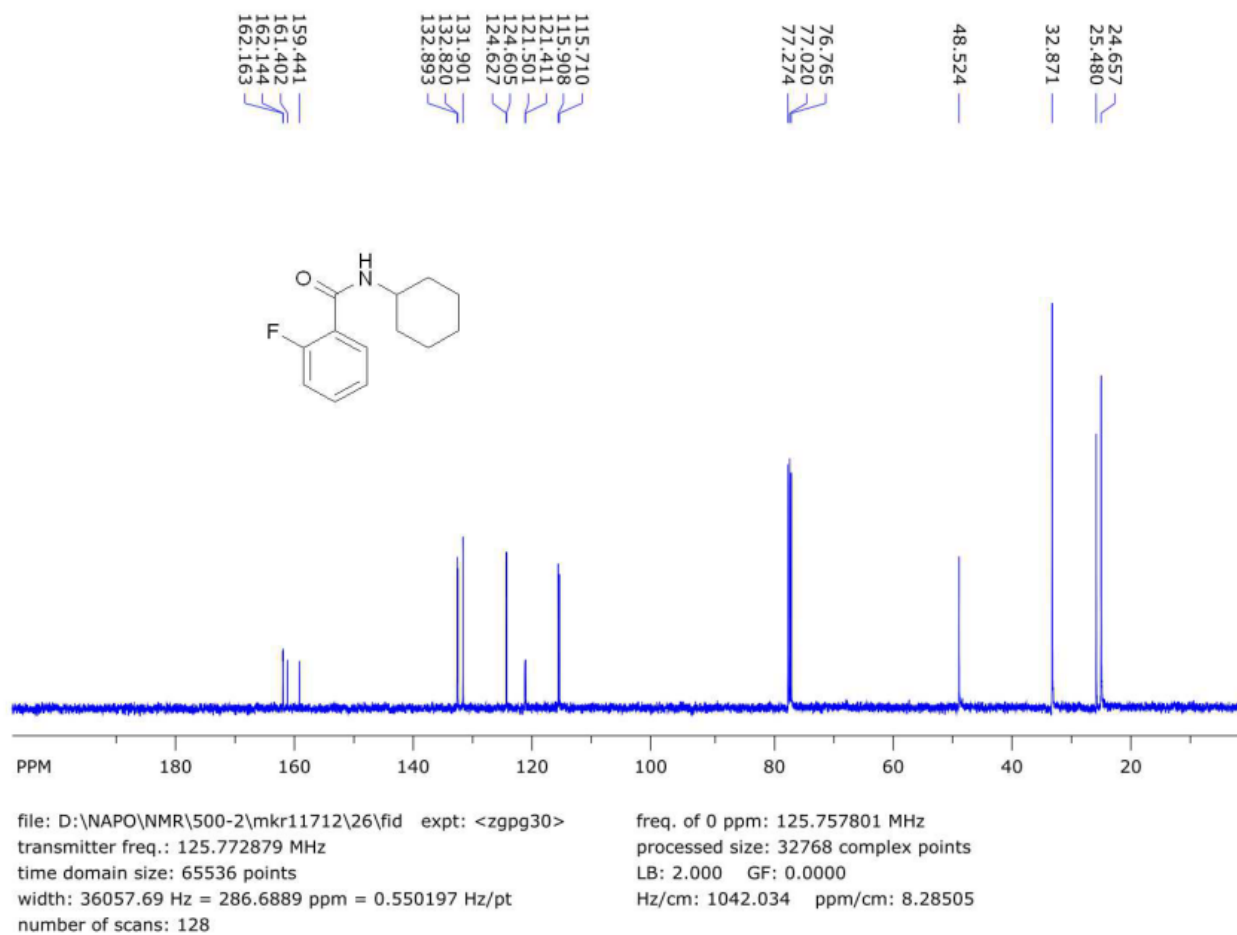

# Compound 5s (NMR in CDCl<sub>3</sub>)

SpinWorks 4: IVA 2911 1H

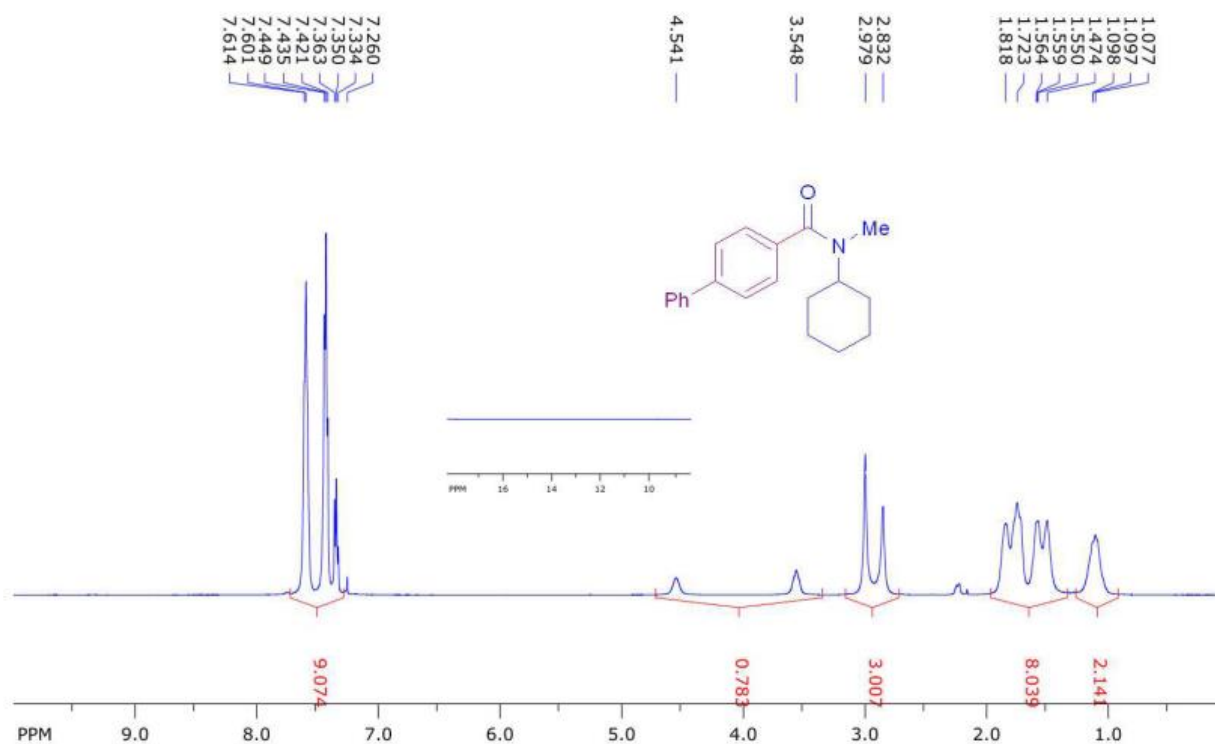

file: ...APO\NMR\500-2\mkr10606\11 2911\fid expt: <zg30>  
 transmitter freq.: 500.133001 MHz  
 time domain size: 65536 points  
 width: 12335.53 Hz = 24.6645 ppm = 0.188225 Hz/pt  
 number of scans: 24

freq. of 0 ppm: 500.130024 MHz  
 processed size: 65536 complex points  
 LB: 0.300 GF: 0.0000  
 Hz/cm: 200.316 ppm/cm: 0.40053

# Compound 5s (NMR in CDCl<sub>3</sub>)

SpinWorks 4: IVA 2911 13C

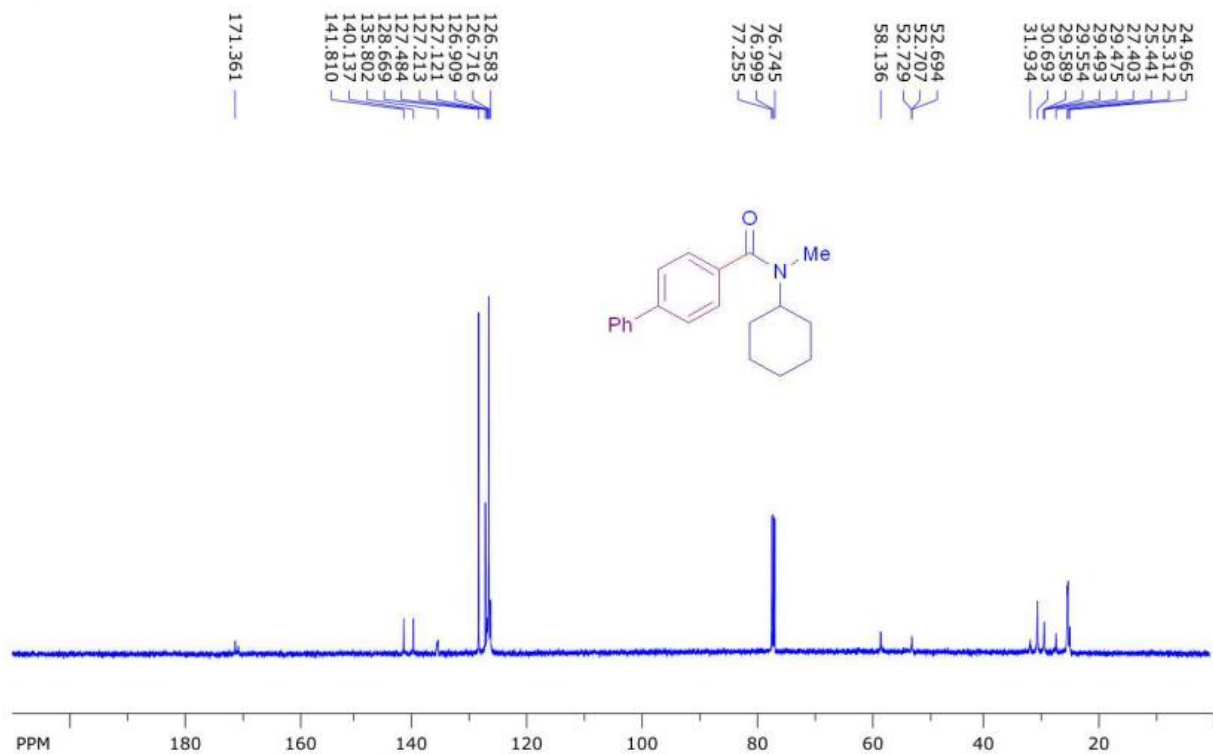

file: D:\NAPO\NMR\500-2\mkr10606\12\fid expt: <zpgg30>  
 transmitter freq.: 125.772879 MHz  
 time domain size: 65536 points  
 width: 36057.69 Hz = 286.6889 ppm = 0.550197 Hz/pt  
 number of scans: 512

freq. of 0 ppm: 125.757818 MHz  
 processed size: 32768 complex points  
 LB: 2.000 GF: 0.0000  
 Hz/cm: 1056.203 ppm/cm: 8.39770

# Compound 5t (NMR in CDCl<sub>3</sub>)

SpinWorks 4: IVA 1429 1H CDCl<sub>3</sub>

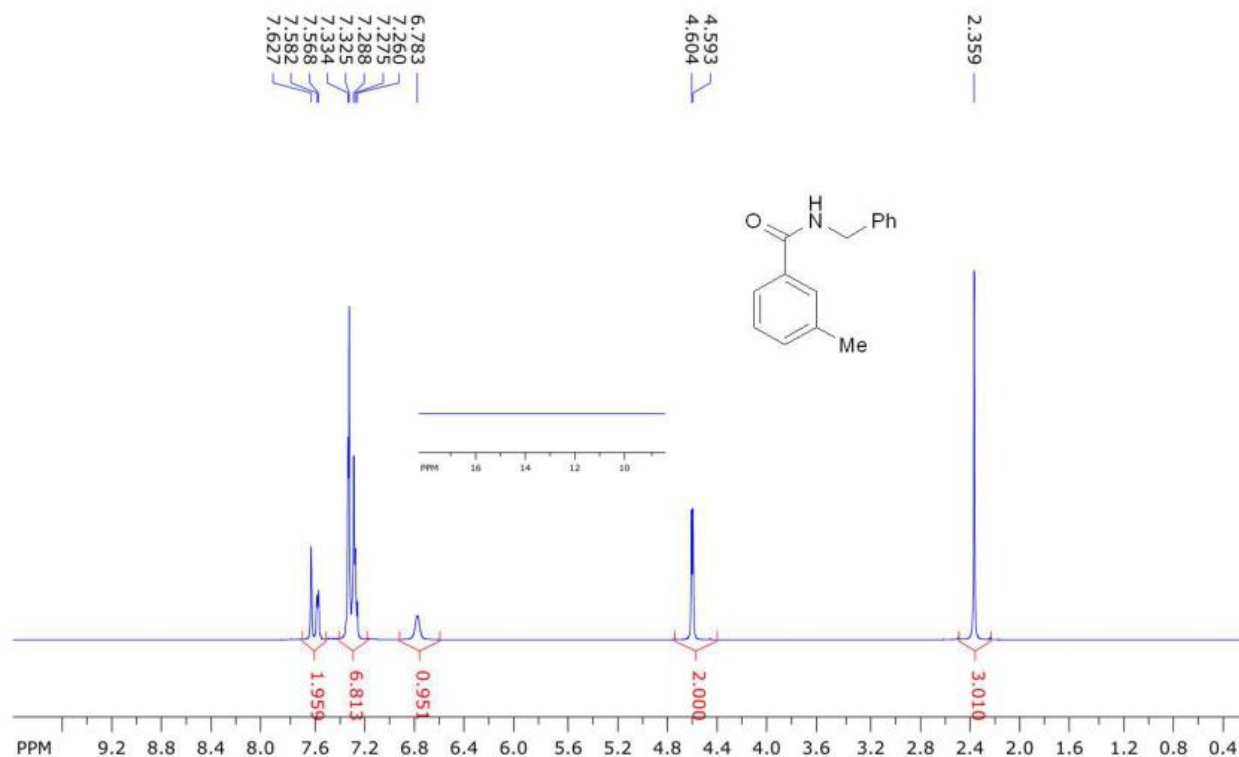

file: D:\NAPO\NMR\500-2\mkr11712\13\fid expt: <zg30>  
transmitter freq.: 500.133001 MHz  
time domain size: 65536 points  
width: 12335.53 Hz = 24.6645 ppm = 0.188225 Hz/pt  
number of scans: 24

freq. of 0 ppm: 500.130023 MHz  
processed size: 65536 complex points  
LB: 0.300 GF: 0.0000  
Hz/cm: 196.350 ppm/cm: 0.39260

# Compound 5t (NMR in CDCl<sub>3</sub>)

SpinWorks 4: IVA 1429 13C CDCl<sub>3</sub>

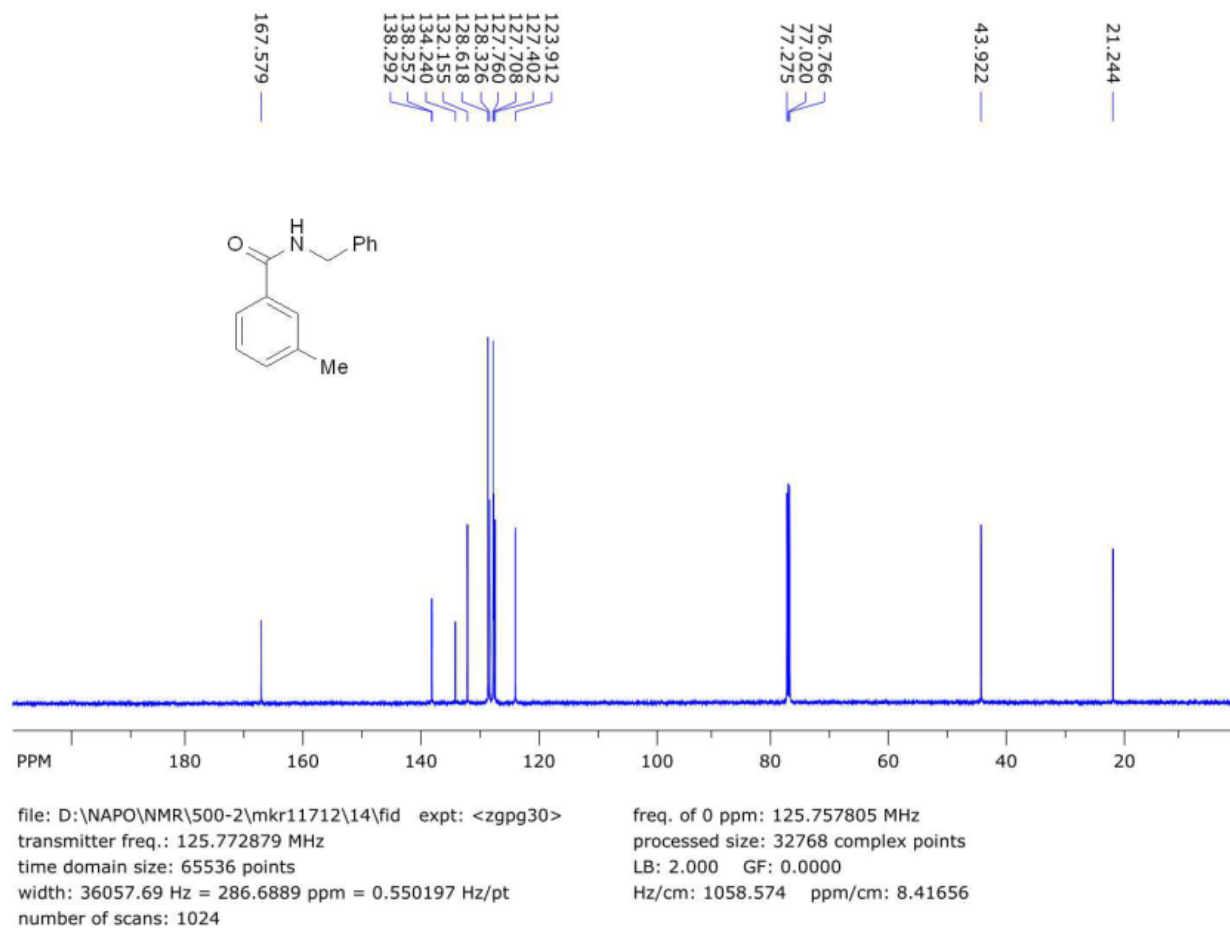

# Compound 5u (NMR in CDCl<sub>3</sub>)

SpinWorks 4: IVA 2340 1H

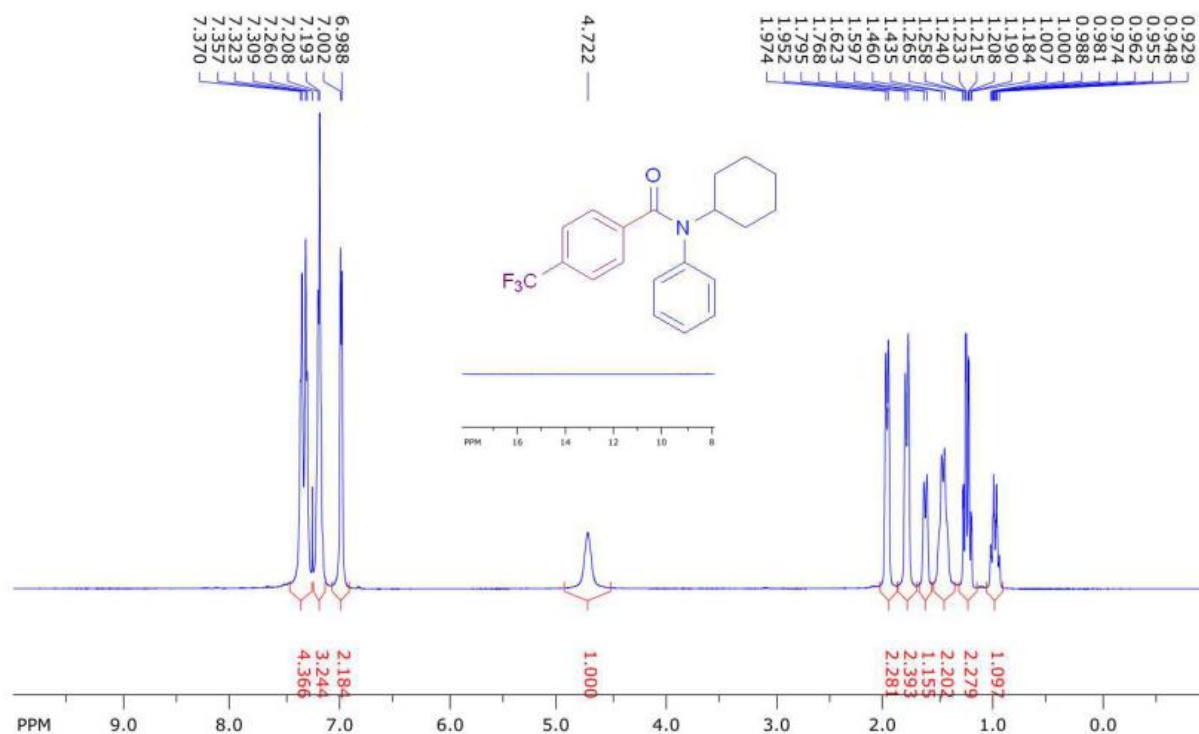

file: D:\NAPO\NMR\500-2\mkr10904\1\fid expt: <zg30>  
 transmitter freq.: 500.133001 MHz  
 time domain size: 65536 points  
 width: 12335.53 Hz = 24.6645 ppm = 0.188225 Hz/pt  
 number of scans: 24

freq. of 0 ppm: 500.130023 MHz  
 processed size: 65536 complex points  
 LB: 0.300 GF: 0.0000  
 Hz/cm: 220.511 ppm/cm: 0.44091

# Compound 5u (NMR in CDCl<sub>3</sub>)

SpinWorks 4: IVA 2340 13C

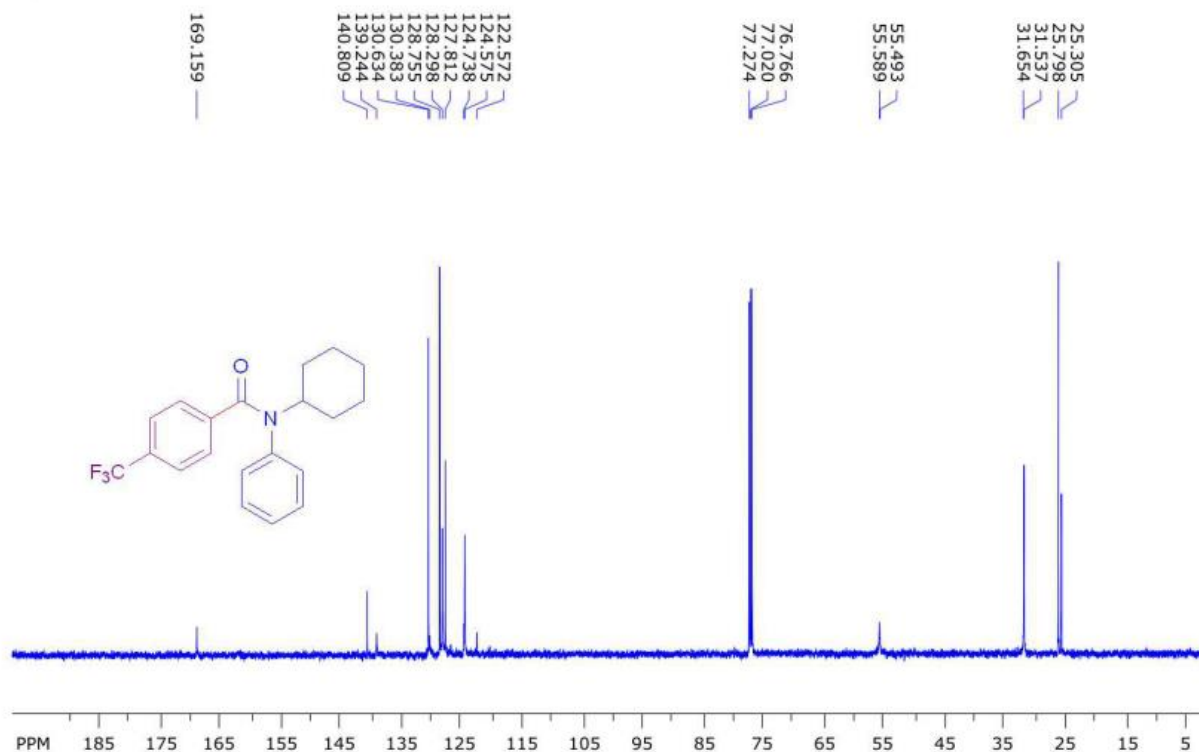

file: D:\NAPO\NMR\500-2\mkr10904\2\fid expt: <zpgp30>  
 transmitter freq.: 125.772879 MHz  
 time domain size: 65536 points  
 width: 36057.69 Hz = 286.6889 ppm = 0.550197 Hz/pt  
 number of scans: 512

freq. of 0 ppm: 125.757795 MHz  
 processed size: 32768 complex points  
 LB: 2.000 GF: 0.0000  
 Hz/cm: 1001.957 ppm/cm: 7.96640

# Compound 5v (NMR in CDCl<sub>3</sub>)

SpinWorks 4: IVA 1848 1H

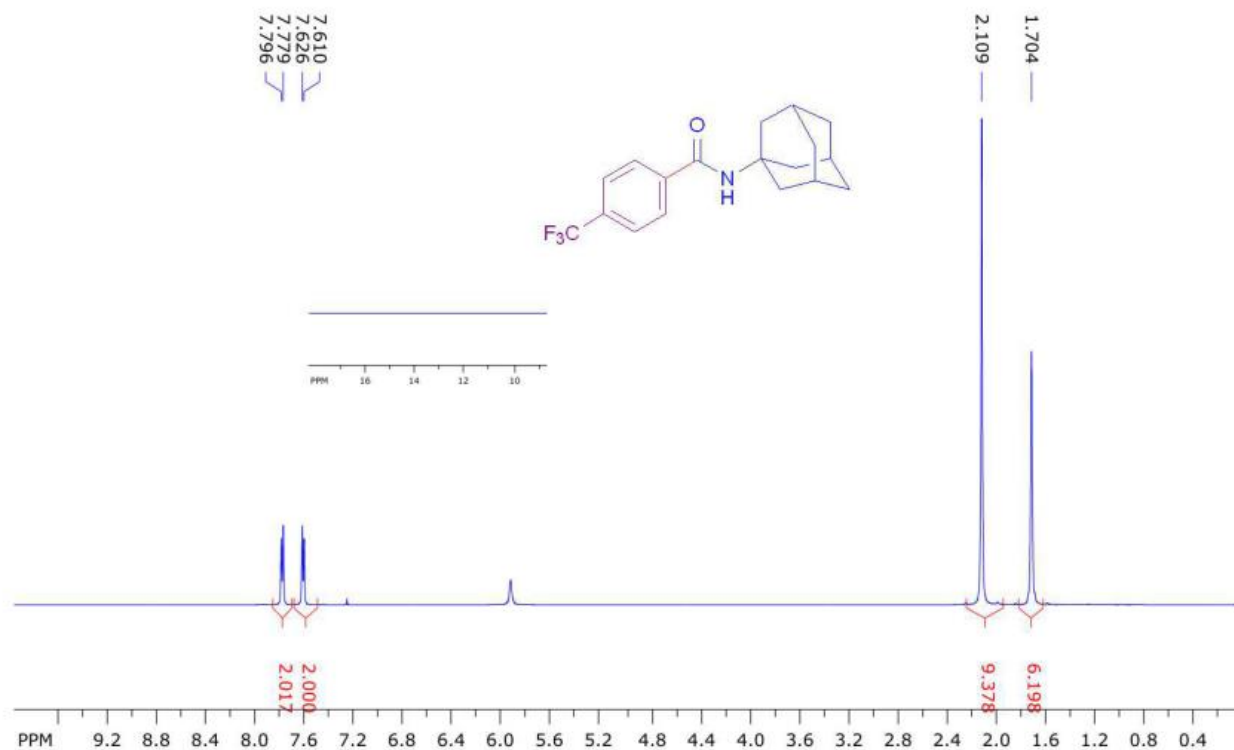

file: ...NAPO\NMR\500-2\mkr11906\7 1848\fid expt: <zg30>  
transmitter freq.: 500.133001 MHz  
time domain size: 65536 points  
width: 12335.53 Hz = 24.6645 ppm = 0.188225 Hz/pt  
number of scans: 24

freq. of 0 ppm: 500.130022 MHz  
processed size: 65536 complex points  
LB: 0.300 GF: 0.0000  
Hz/cm: 198.678 ppm/cm: 0.39725

# Compound 5v (NMR in CDCl<sub>3</sub>)

SpinWorks 4: IVA 1848 13C

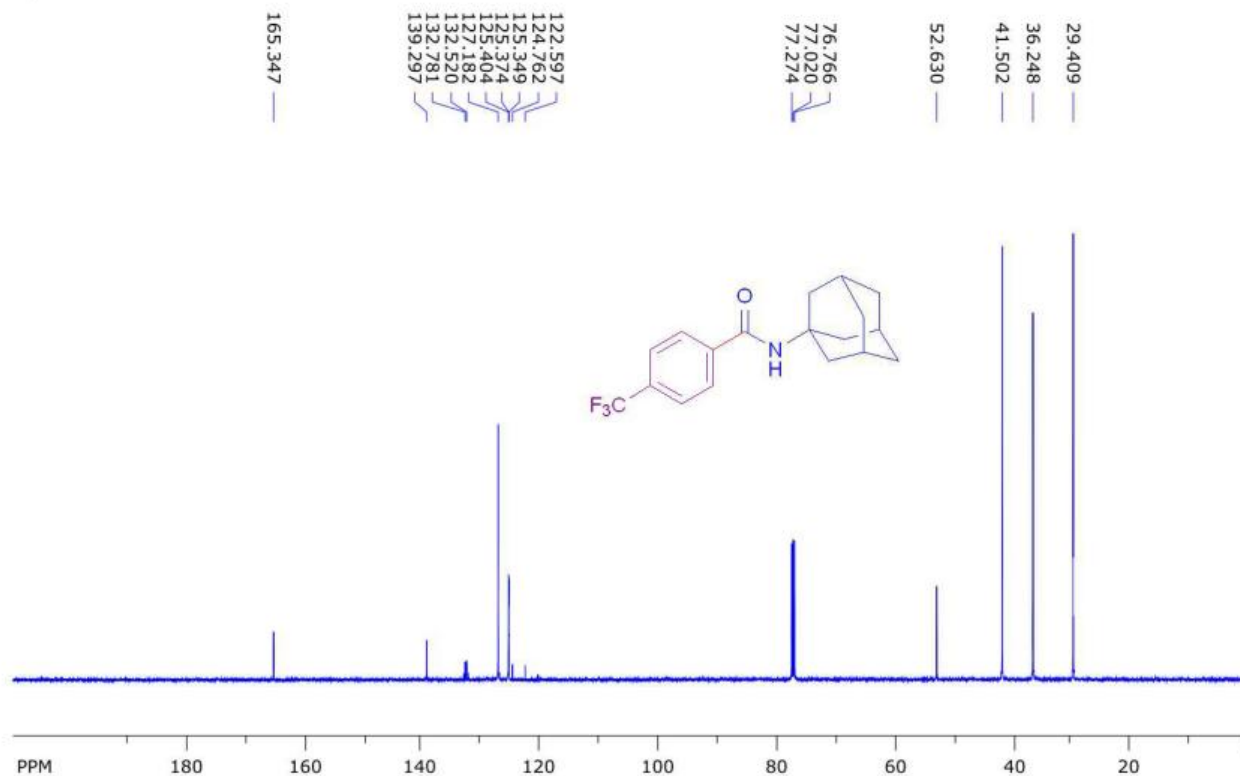

file: D:\NAPO\NMR\500-2\mkr11906\8\fid expt: <zpgp30>  
 transmitter freq.: 125.772879 MHz  
 time domain size: 65536 points  
 width: 36057.69 Hz = 286.6889 ppm = 0.550197 Hz/pt  
 number of scans: 512

freq. of 0 ppm: 125.757796 MHz  
 processed size: 32768 complex points  
 LB: 2.000 GF: 0.0000  
 Hz/cm: 1056.203 ppm/cm: 8.39770

# Compound 5w (NMR in CDCl<sub>3</sub>)

SpinWorks 4: IVA 2839 1H

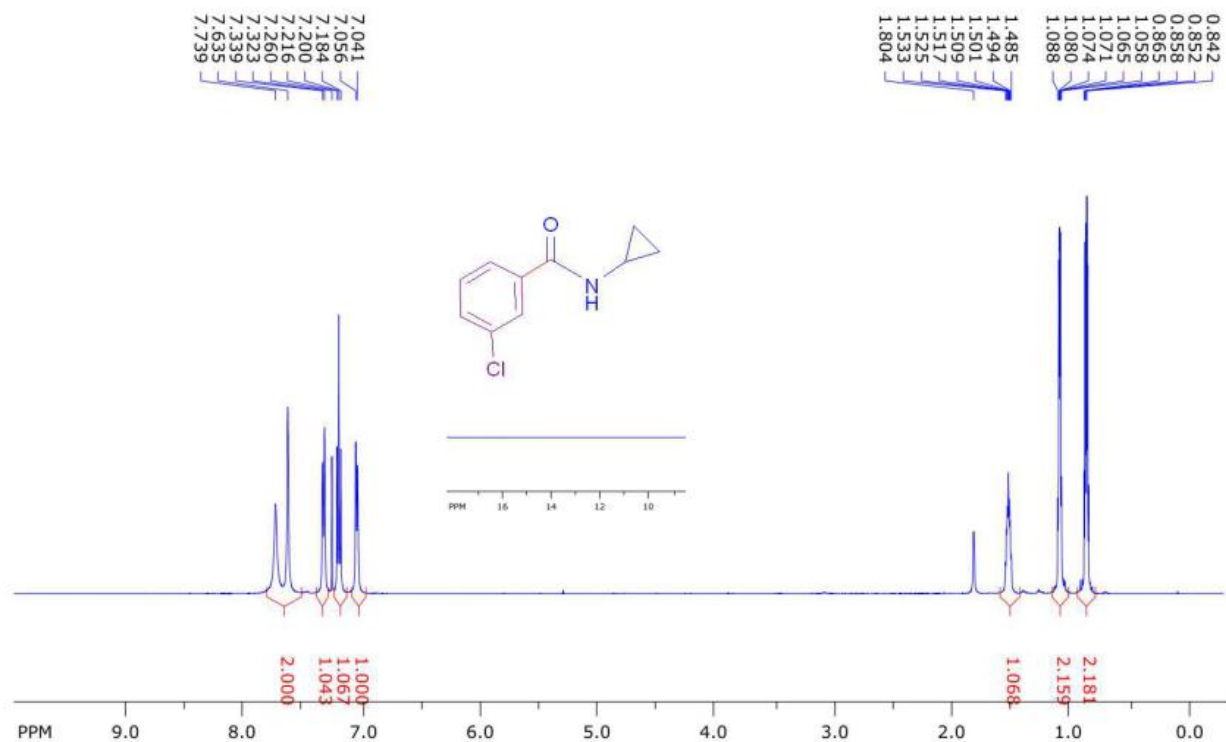

file: ...\\NMR\\500-2\\mkr12405\\3 iva 2839\\fid expt: <zg30>  
 transmitter freq.: 500.133001 MHz  
 time domain size: 65536 points  
 width: 12335.53 Hz = 24.6645 ppm = 0.188225 Hz/pt  
 number of scans: 24

freq. of 0 ppm: 500.130023 MHz  
 processed size: 65536 complex points  
 LB: 0.300 GF: 0.0000  
 Hz/cm: 205.774 ppm/cm: 0.41144

# Compound 5w (NMR in CDCl<sub>3</sub>)

SpinWorks 4: IVA 2839 13C

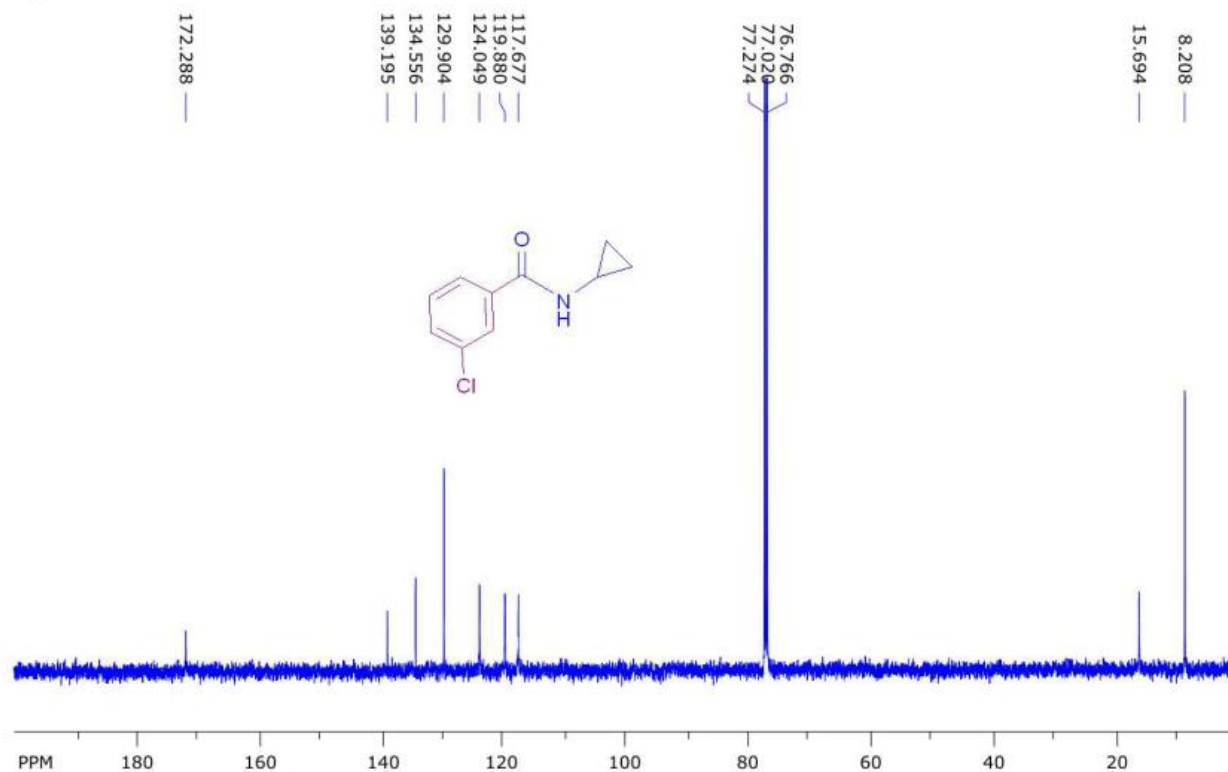

file: D:\NAPO\NMR\500-2\mkr12405\4\fid expt: <zpgp30>  
transmitter freq.: 125.772879 MHz  
time domain size: 65536 points  
width: 36057.69 Hz = 286.6889 ppm = 0.550197 Hz/pt  
number of scans: 256

freq. of 0 ppm: 125.757794 MHz  
processed size: 32768 complex points  
LB: 2.000 GF: 0.0000  
Hz/cm: 1013.125 ppm/cm: 8.05520

# Compound 5x (NMR in CDCl<sub>3</sub>)

SpinWorks 4: IVA 2930 1H

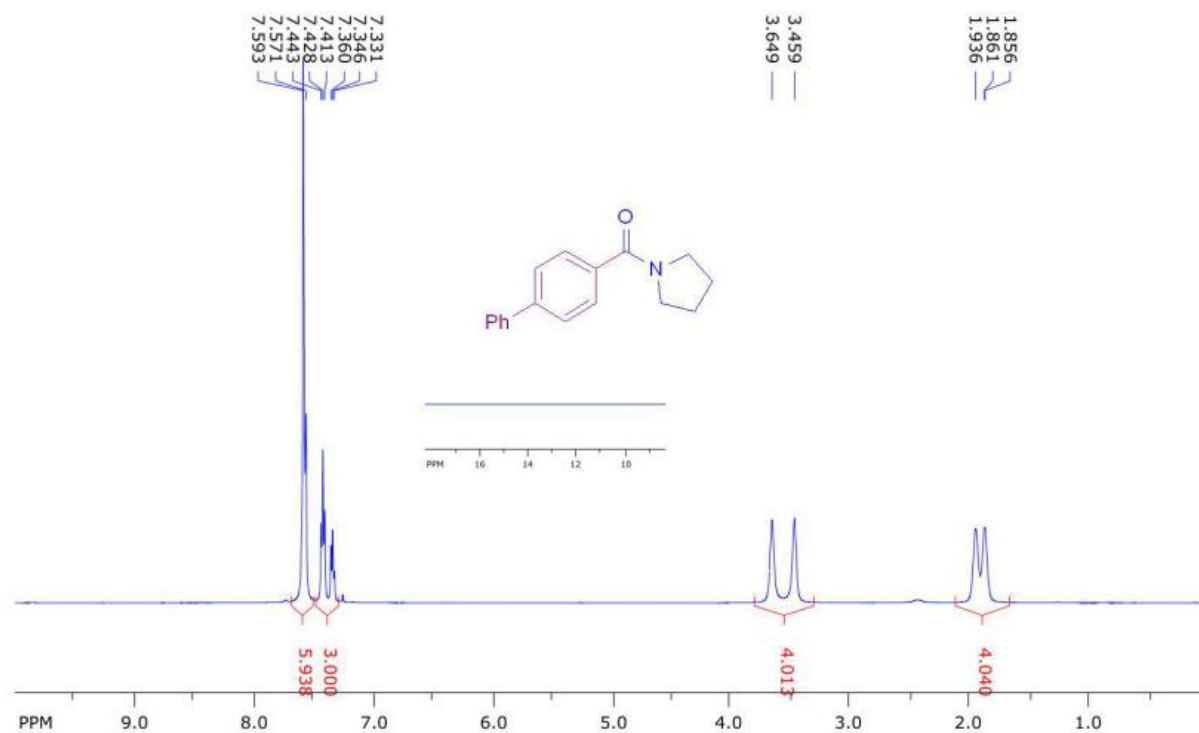

file: ...NAPO\NMR\500-2\mkr10706\9 2930\fid expt: <zg30>  
 transmitter freq.: 500.133001 MHz  
 time domain size: 65536 points  
 width: 12335.53 Hz = 24.6645 ppm = 0.188225 Hz/pt  
 number of scans: 24

freq. of 0 ppm: 500.130022 MHz  
 processed size: 65536 complex points  
 LB: 0.300 GF: 0.0000  
 Hz/cm: 200.862 ppm/cm: 0.40162

# Compound 5x (NMR in CDCl<sub>3</sub>)

SpinWorks 4: IVA 2930 13C

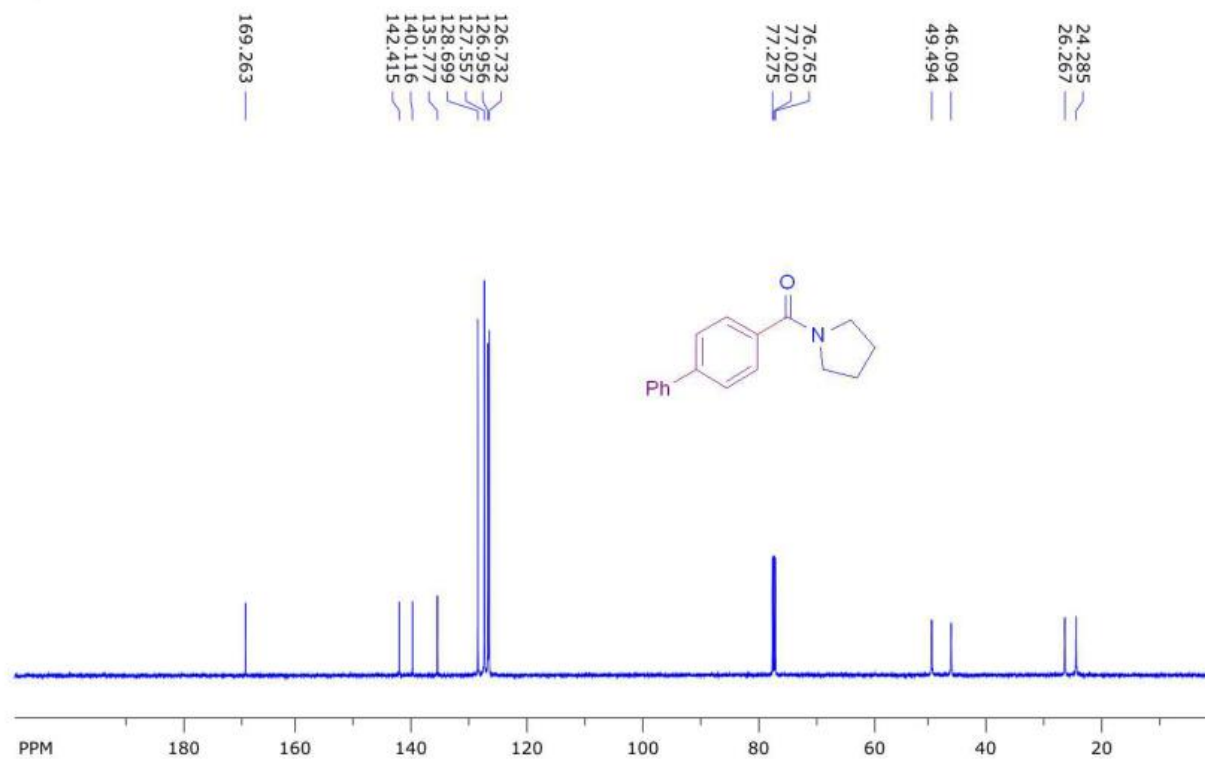

file: D:\NAPO\NMR\500-2\mkr10706\10\fid expt: <zpgg30>  
 transmitter freq.: 125.772879 MHz  
 time domain size: 65536 points  
 width: 36057.69 Hz = 286.6889 ppm = 0.550197 Hz/pt  
 number of scans: 512

freq. of 0 ppm: 125.757814 MHz  
 processed size: 32768 complex points  
 LB: 2.000 GF: 0.0000  
 Hz/cm: 1056.203 ppm/cm: 8.39770

# Compound 5y (NMR in CDCl<sub>3</sub>)

SpinWorks 4: IVA 1425 1H

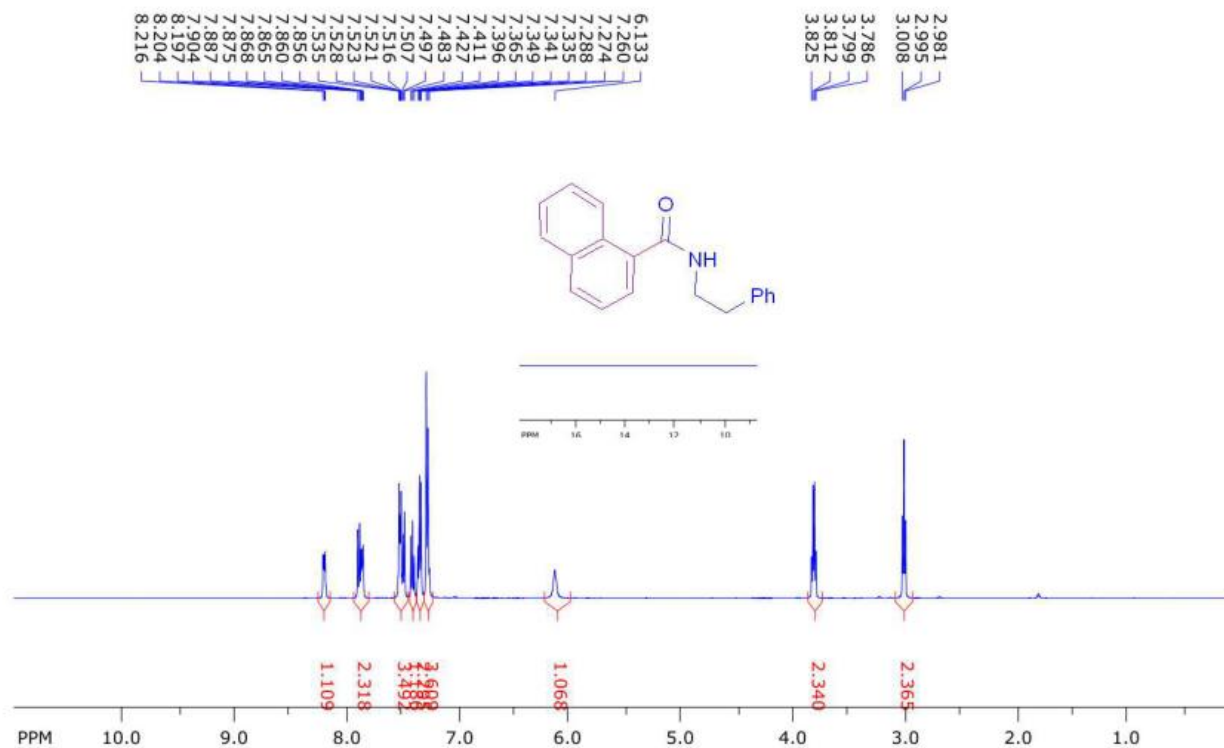

file: D:\NAPO\NMR\500-2\mkr100201\7\fid expt: <zg30>  
 transmitter freq.: 500.133001 MHz  
 time domain size: 65536 points  
 width: 12335.53 Hz = 24.6645 ppm = 0.188225 Hz/pt  
 number of scans: 24

freq. of 0 ppm: 500.130011 MHz  
 processed size: 65536 complex points  
 LB: 0.300 GF: 0.0000  
 Hz/cm: 219.420 ppm/cm: 0.43872

# Compound 5y (NMR in CDCl<sub>3</sub>)

SpinWorks 4: IVA 1425 13C

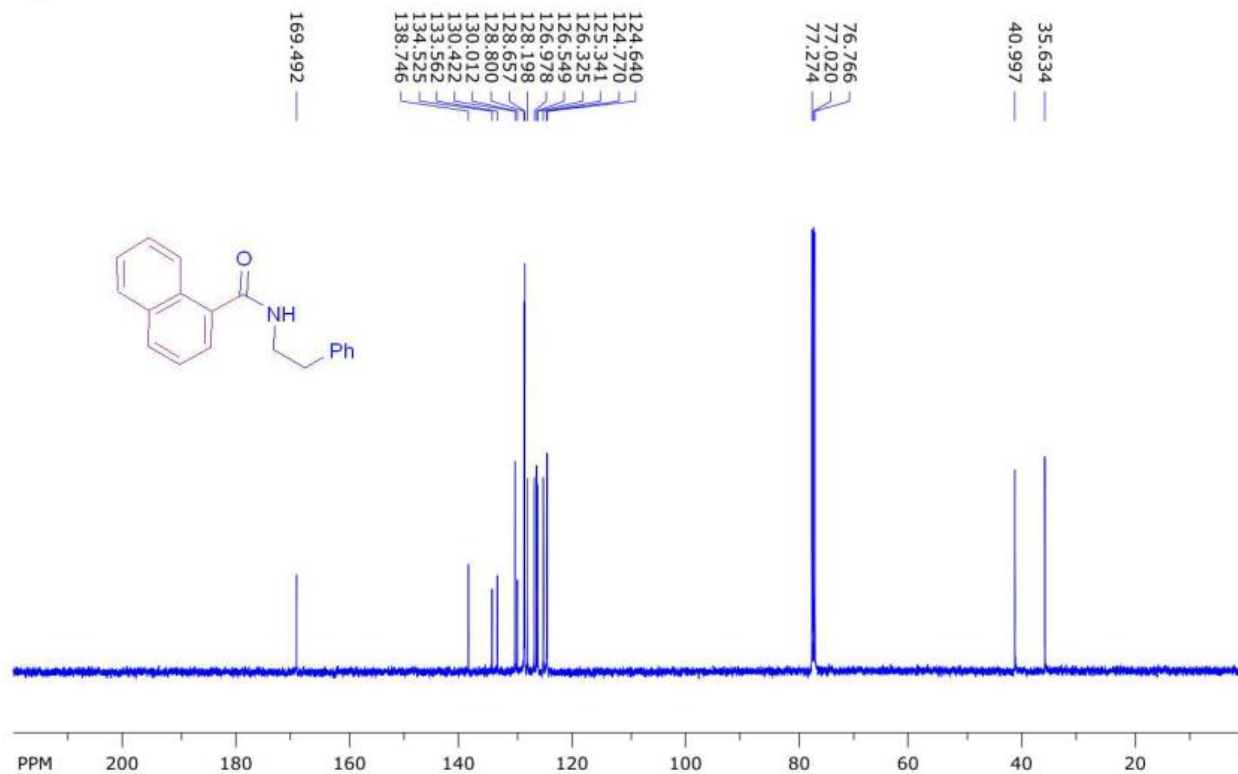

file: D:\NAPO\NMR\500-2\mkr100201\8\fid expt: <zpgp30>  
 transmitter freq.: 125.772879 MHz  
 time domain size: 65536 points  
 width: 36057.69 Hz = 286.6889 ppm = 0.550197 Hz/pt  
 number of scans: 512

freq. of 0 ppm: 125.757800 MHz  
 processed size: 32768 complex points  
 LB: 2.000 GF: 0.0000  
 Hz/cm: 1107.258 ppm/cm: 8.80363

# Compound 5z (NMR in CDCl<sub>3</sub>)

SpinWorks 4: IVA 1386 1H CDCl<sub>3</sub>

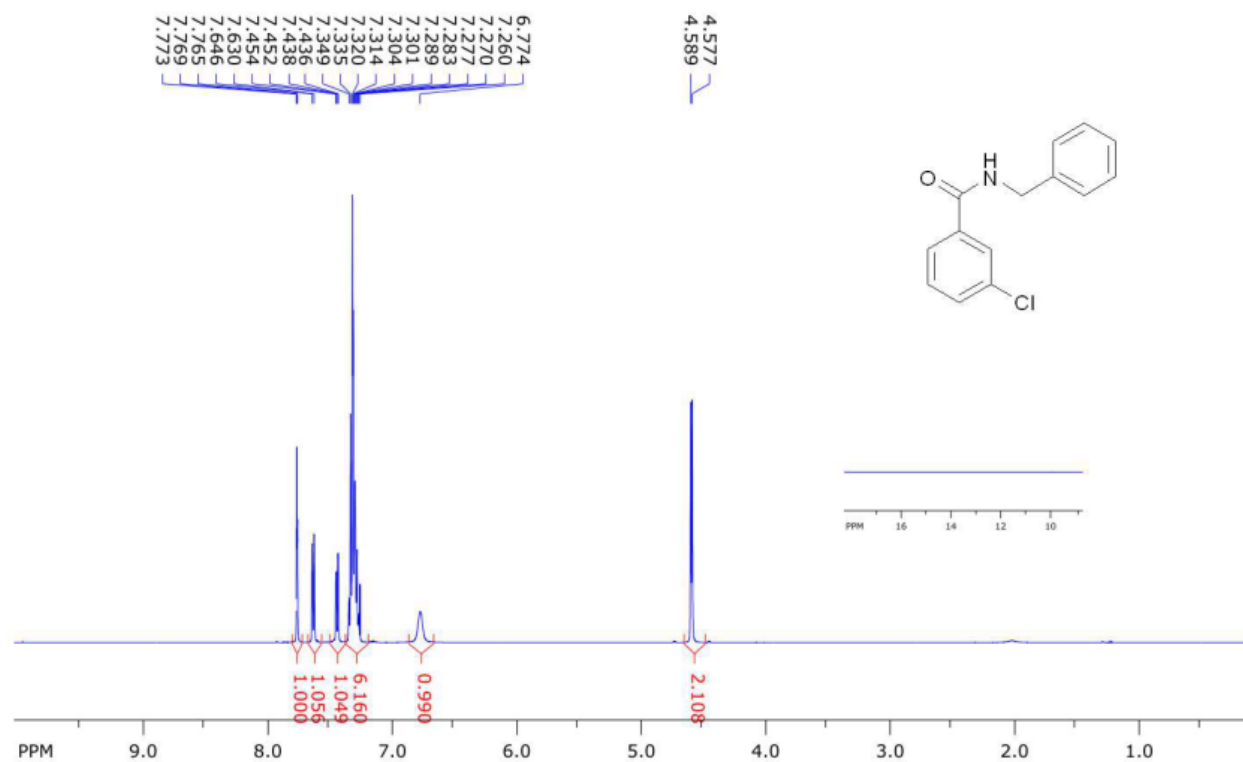

file: D:\NAPO\NMR\500-2\mkr11112\23\fid expt: <zg30>  
 transmitter freq.: 500.133001 MHz  
 time domain size: 65536 points  
 width: 12335.53 Hz = 24.6645 ppm = 0.188225 Hz/pt  
 number of scans: 24

freq. of 0 ppm: 500.130023 MHz  
 processed size: 65536 complex points  
 LB: 0.300 GF: 0.0000  
 Hz/cm: 200.311 ppm/cm: 0.40052

# Compound 5z (NMR in CDCl<sub>3</sub>)

SpinWorks 4: IVA 1386 13C CDCl<sub>3</sub>

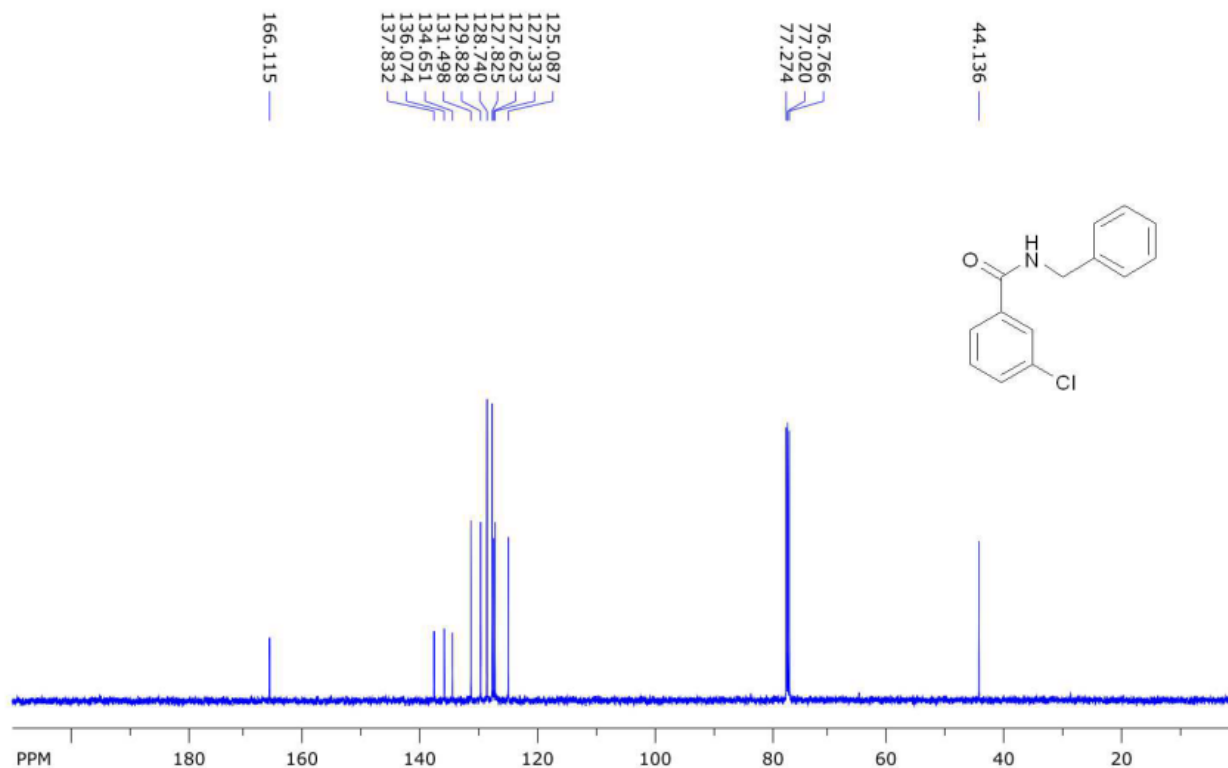

file: D:\NAPO\NMR\500-2\mkr11112\24\fid expt: <zpgg30>  
 transmitter freq.: 125.772879 MHz  
 time domain size: 65536 points  
 width: 36057.69 Hz = 286.6889 ppm = 0.550197 Hz/pt  
 number of scans: 256

freq. of 0 ppm: 125.757799 MHz  
 processed size: 32768 complex points  
 LB: 2.000 GF: 0.0000  
 Hz/cm: 1056.920 ppm/cm: 8.40340

# Compound 5aa (NMR in CDCl<sub>3</sub>)

SpinWorks 4: IVA 1853 1H CDCl<sub>3</sub>

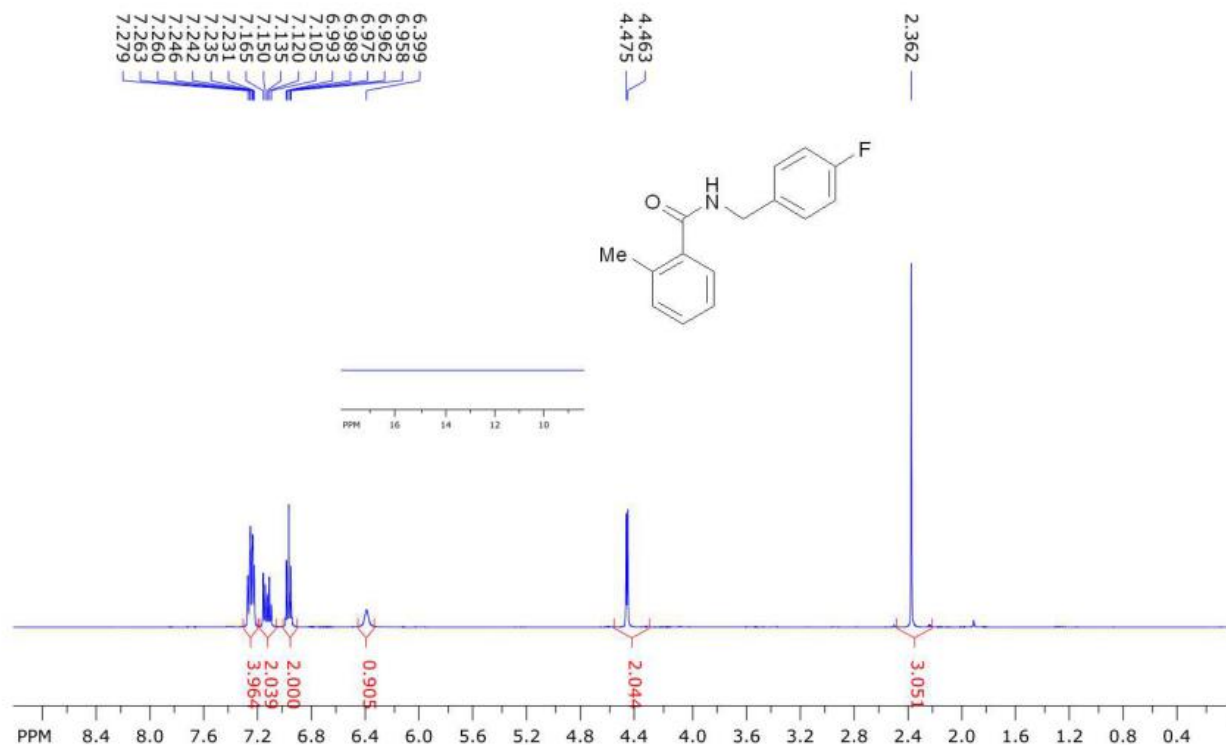

file: D:\NAPO\NMR\500-2\mkr10304\27\fid expt: <zg30>  
 transmitter freq.: 500.133001 MHz  
 time domain size: 65536 points  
 width: 12335.53 Hz = 24.6645 ppm = 0.188225 Hz/pt  
 number of scans: 24

freq. of 0 ppm: 500.130032 MHz  
 processed size: 65536 complex points  
 LB: 0.300 GF: 0.0000  
 Hz/cm: 180.506 ppm/cm: 0.36092

# Compound 5aa (NMR in CDCl<sub>3</sub>)

SpinWorks 4: IVA 1853 13C CDCl<sub>3</sub>

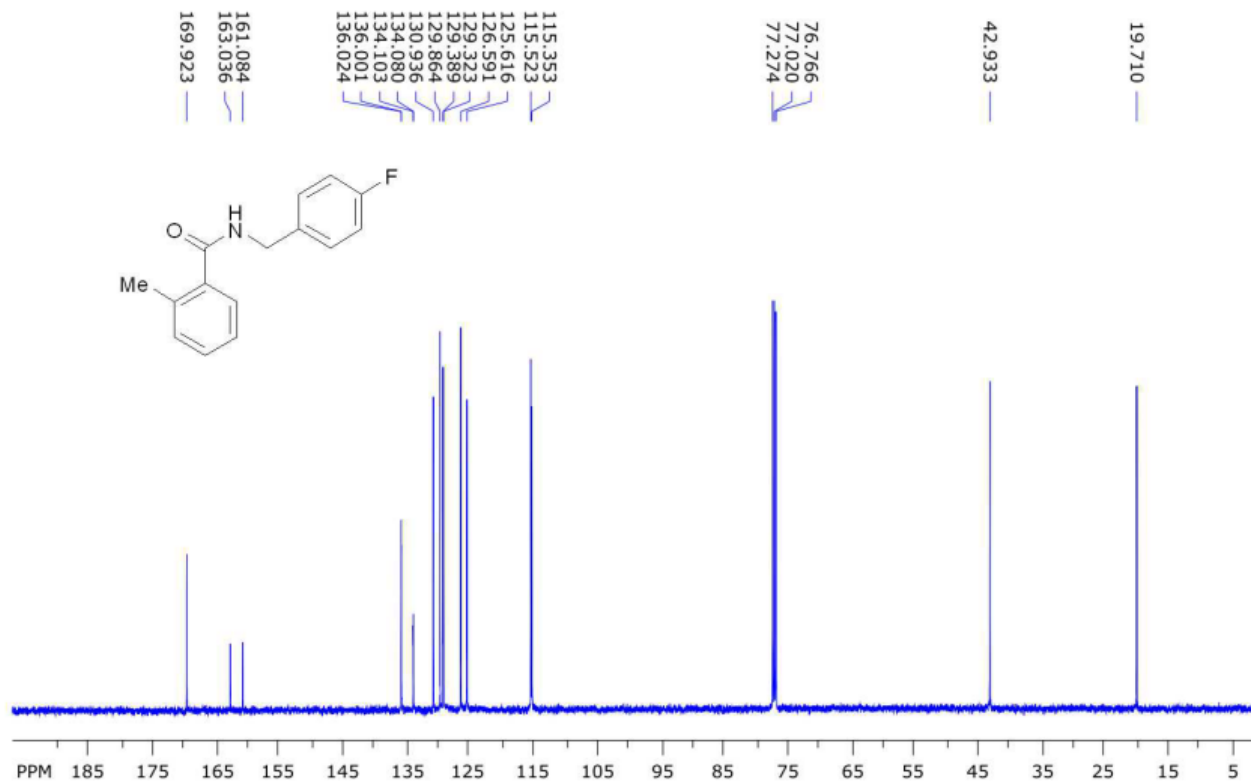

file: D:\NAPO\NMR\500-2\mkr10304\28\fid expt: <zpgp30>  
 transmitter freq.: 125.772879 MHz  
 time domain size: 65536 points  
 width: 36057.69 Hz = 286.6889 ppm = 0.550197 Hz/pt  
 number of scans: 512

freq. of 0 ppm: 125.757802 MHz  
 processed size: 32768 complex points  
 LB: 2.000 GF: 0.0000  
 Hz/cm: 990.760 ppm/cm: 7.87737

# Compound 5ab (NMR in CDCl<sub>3</sub>)

SpinWorks 4: IVA 1414 1H CDCl<sub>3</sub>

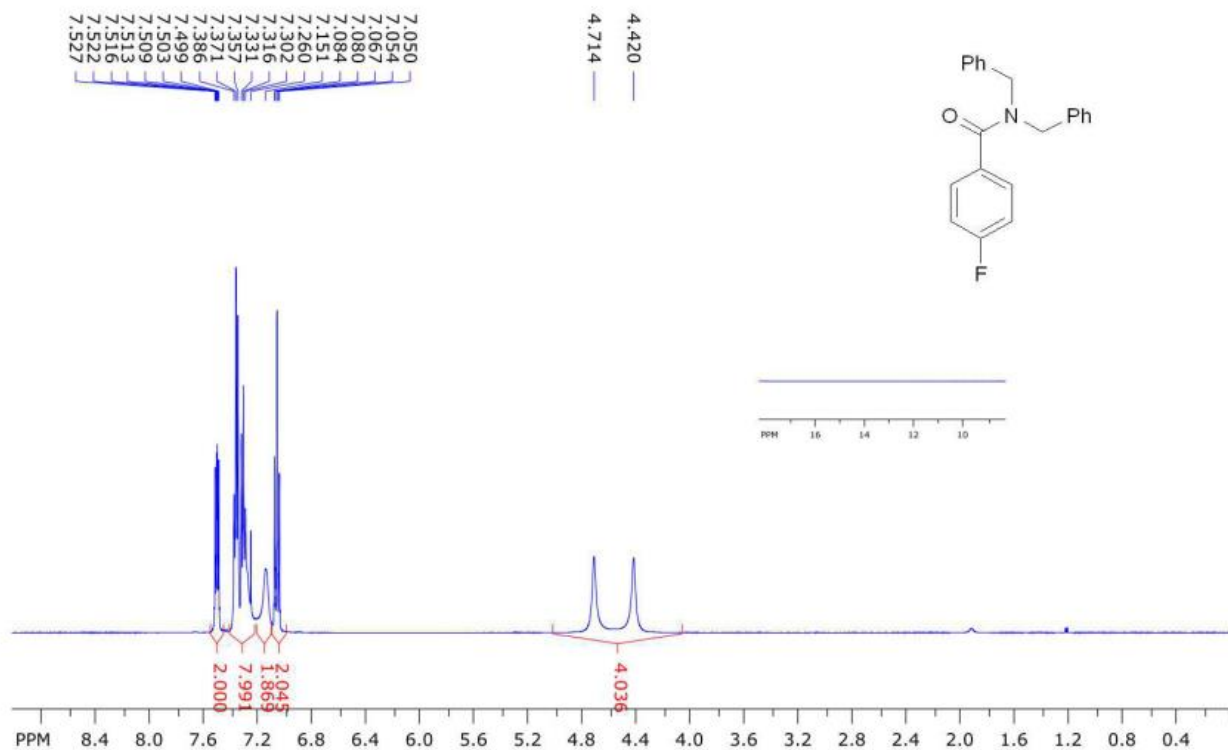

file: D:\NAPO\NMR\500-2\mkr111112\13\fid expt: <zg30>  
 transmitter freq.: 500.133001 MHz  
 time domain size: 65536 points  
 width: 12335.53 Hz = 24.6645 ppm = 0.188225 Hz/pt  
 number of scans: 24

freq. of 0 ppm: 500.130023 MHz  
 processed size: 65536 complex points  
 LB: 0.300 GF: 0.0000  
 Hz/cm: 181.638 ppm/cm: 0.36318

# Compound 5ab (NMR in CDCl<sub>3</sub>)

SpinWorks 4: IVA 1414 13C CDCl<sub>3</sub>

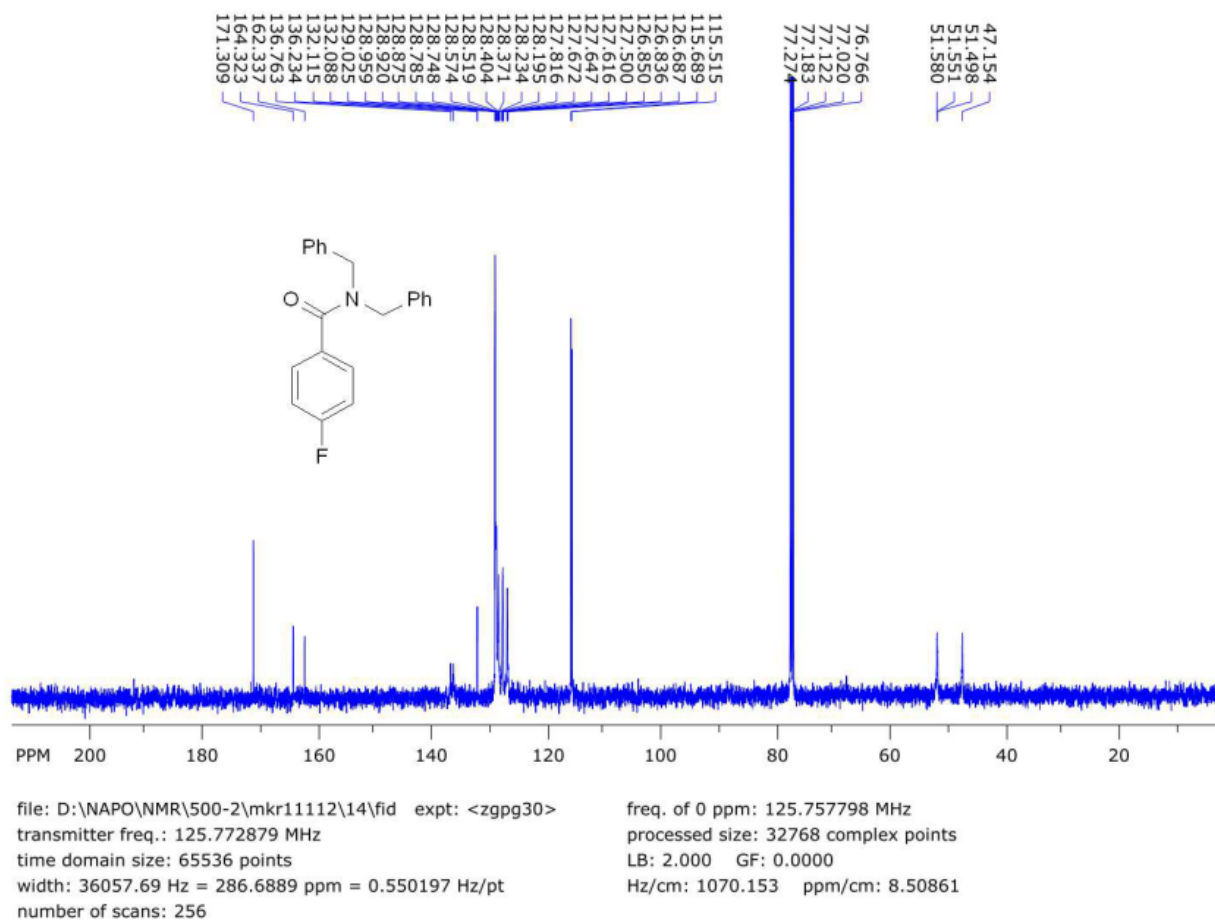

# Compound 5ac (NMR in CDCl<sub>3</sub>)

SpinWorks 4: IAV 1744 1H

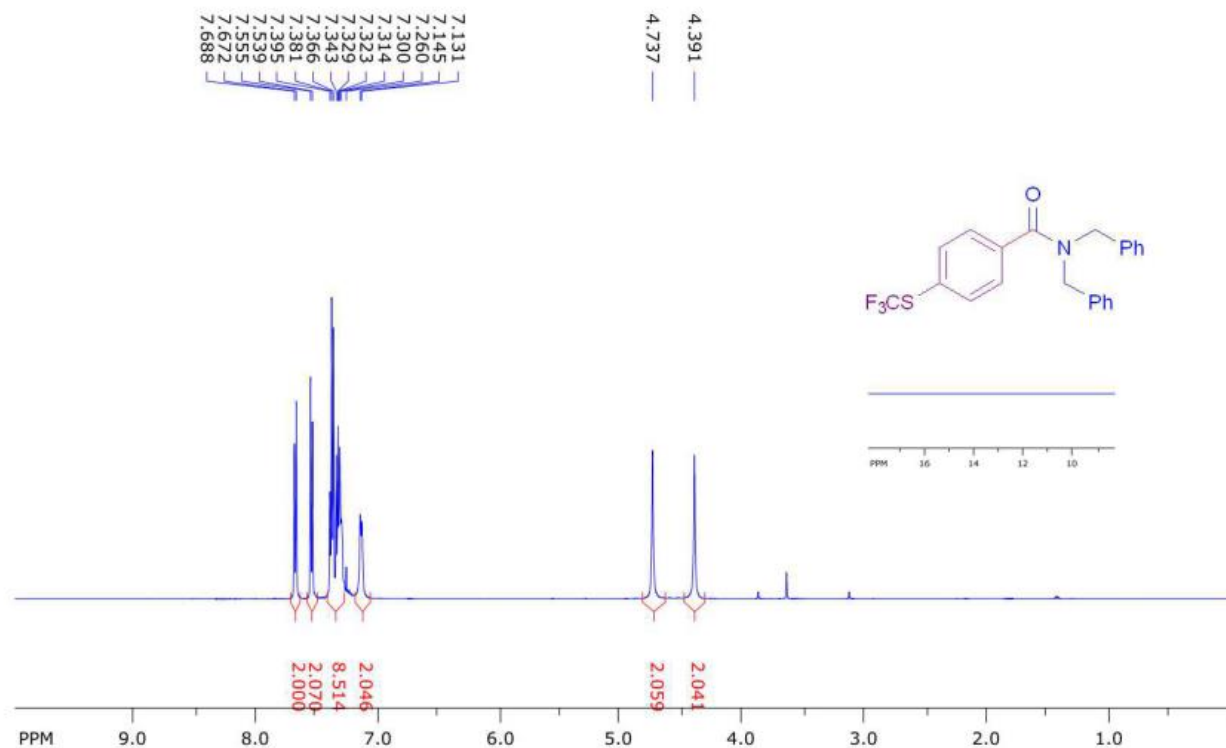

file: D:\NAPO\NMR\500-2\mkr21801\7\fid expt: <zg30>  
 transmitter freq.: 500.133001 MHz  
 time domain size: 65536 points  
 width: 12335.53 Hz = 24.6645 ppm = 0.188225 Hz/pt  
 number of scans: 24

freq. of 0 ppm: 500.130023 MHz  
 processed size: 65536 complex points  
 LB: 0.300 GF: 0.0000  
 Hz/cm: 201.407 ppm/cm: 0.40271

# Compound 5ac (NMR in CDCl<sub>3</sub>)

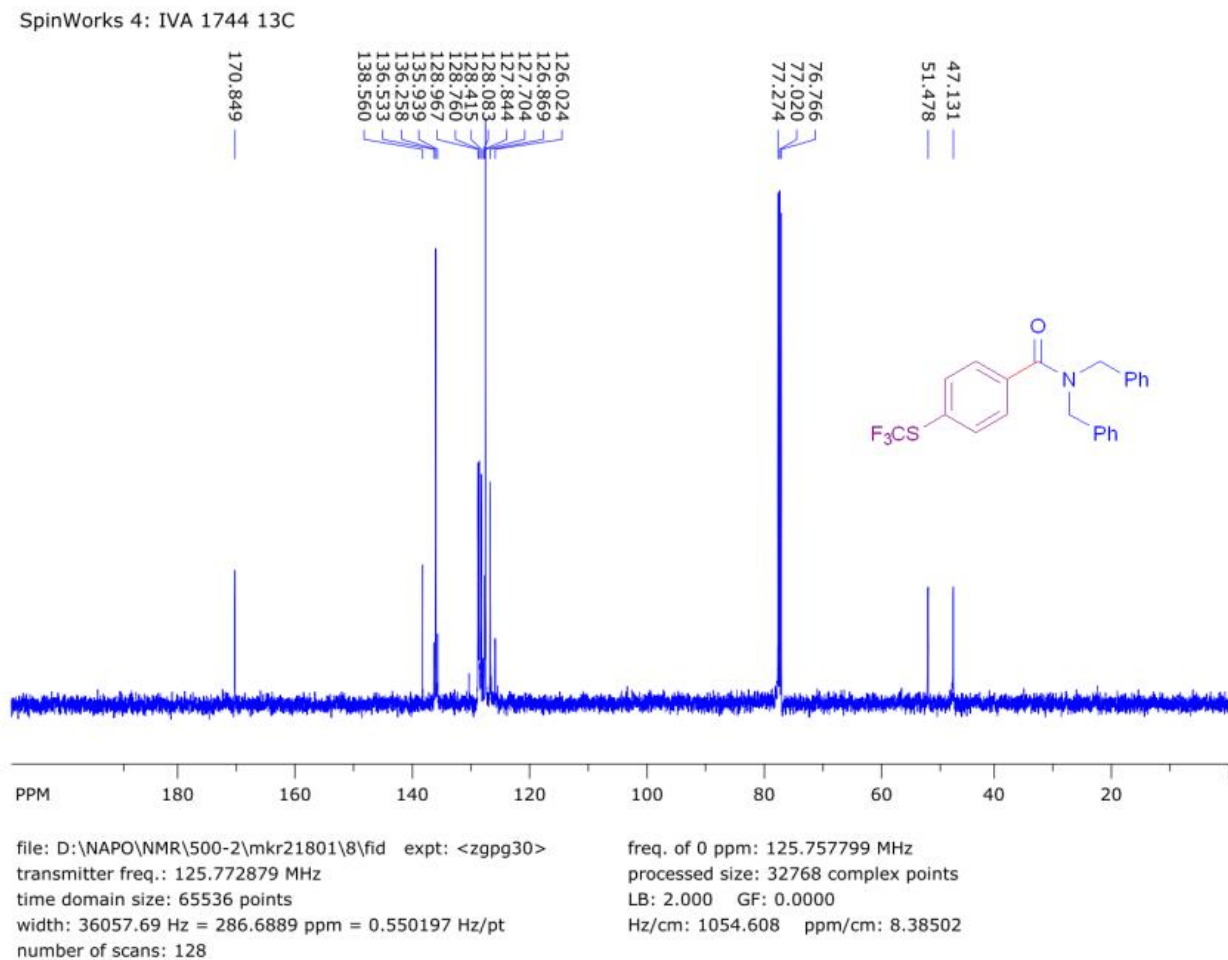

# Compound 5ad (NMR in CDCl<sub>3</sub>)

SpinWorks 4: IVA 1435 1H CDCl<sub>3</sub>

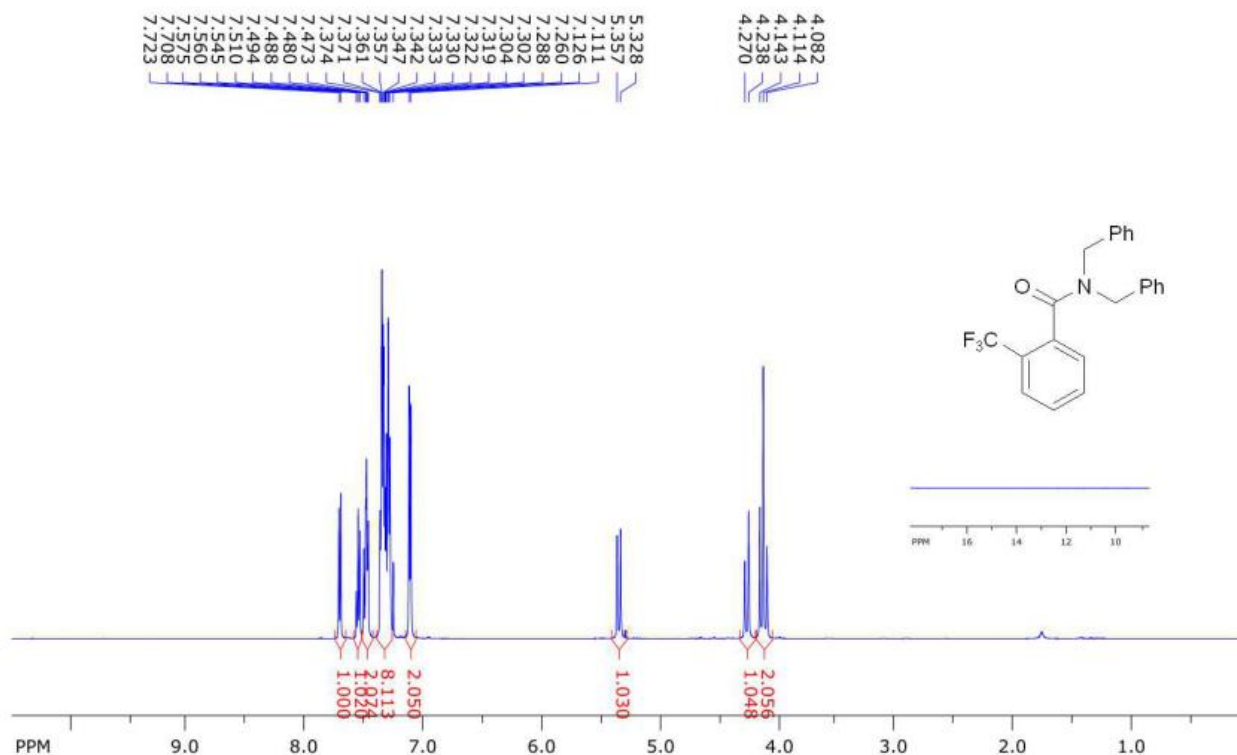

file: D:\NAPO\NMR\500-2\mkr11712\15\fid expt: <zg30>  
 transmitter freq.: 500.133001 MHz  
 time domain size: 65536 points  
 width: 12335.53 Hz = 24.6645 ppm = 0.188225 Hz/pt  
 number of scans: 24

freq. of 0 ppm: 500.130023 MHz  
 processed size: 65536 complex points  
 LB: 0.300 GF: 0.0000  
 Hz/cm: 209.930 ppm/cm: 0.41975

# Compound 5ad (NMR in CDCl<sub>3</sub>)

SpinWorks 4: IVA 1435 13C CDCl<sub>3</sub>

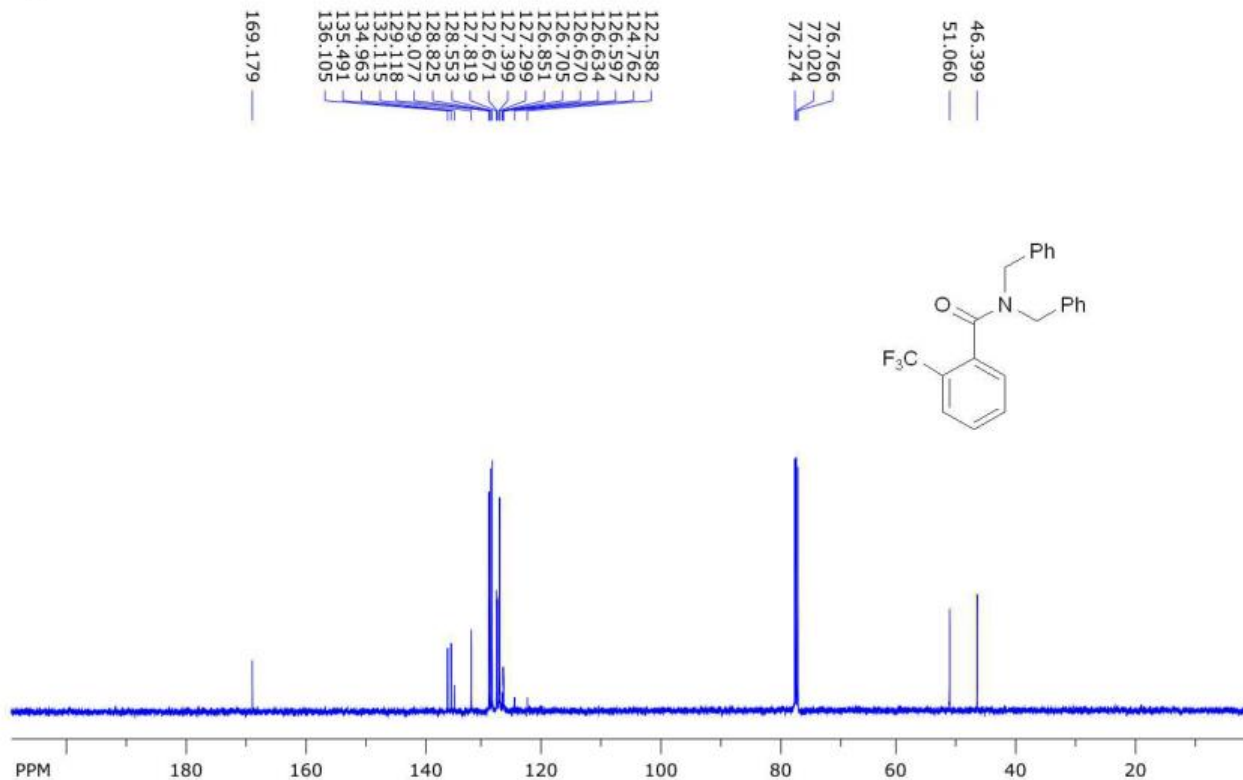

file: D:\NAPO\NMR\500-2\mkr11712\16\fid exp: <zgpg30>  
 transmitter freq.: 125.772879 MHz  
 time domain size: 65536 points  
 width: 36057.69 Hz = 286.6889 ppm = 0.550197 Hz/pt  
 number of scans: 256

freq. of 0 ppm: 125.757797 MHz  
 processed size: 32768 complex points  
 LB: 2.000 GF: 0.0000  
 Hz/cm: 1060.228 ppm/cm: 8.42971

# Compound 5ae (NMR in CDCl<sub>3</sub>)

SpinWorks 4: IVA 2358 1H CDCl<sub>3</sub>

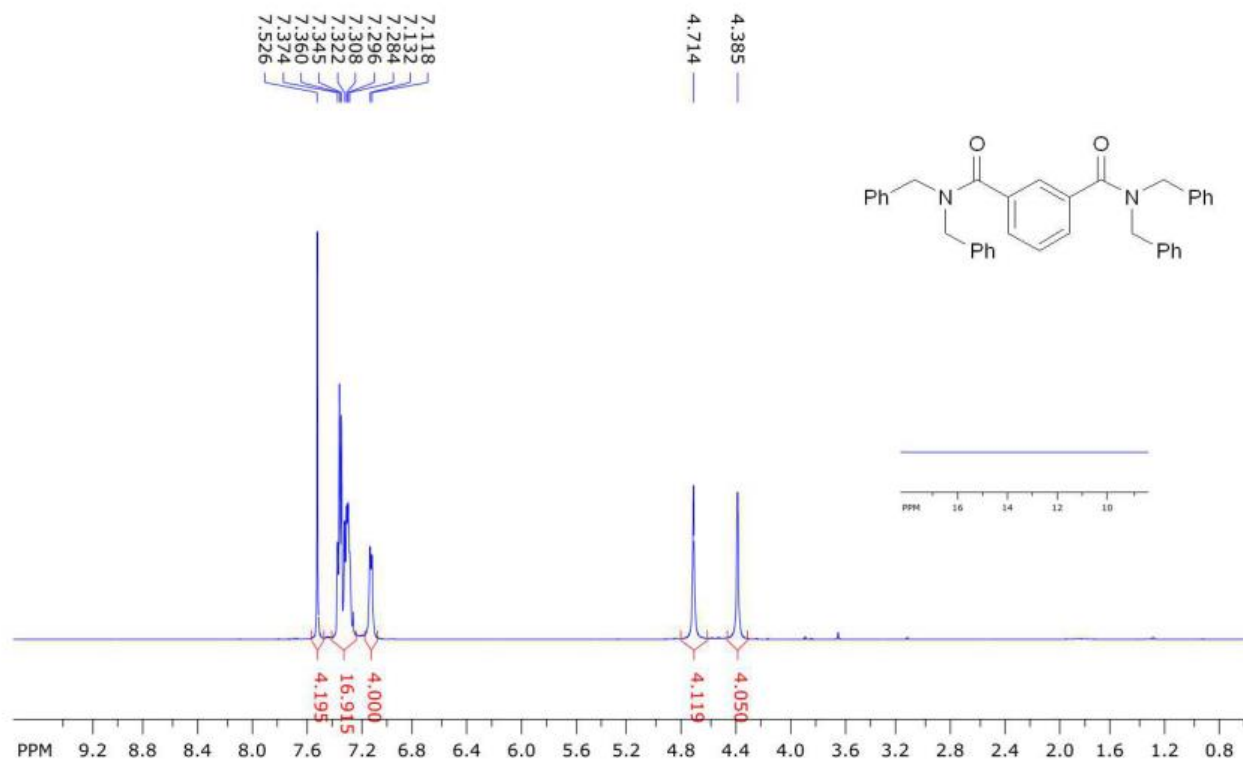

file: D:\NAPO\NMR\500-2\mkr11504\17\fid expt: <zg30>  
 transmitter freq.: 500.133001 MHz  
 time domain size: 65536 points  
 width: 12335.53 Hz = 24.6645 ppm = 0.188225 Hz/pt  
 number of scans: 24

freq. of 0 ppm: 500.130024 MHz  
 processed size: 65536 complex points  
 LB: 0.300 GF: 0.0000  
 Hz/cm: 185.599 ppm/cm: 0.37110

# Compound 5ae (NMR in CDCl<sub>3</sub>)

SpinWorks 4: IVA 2358 13C CDCl<sub>3</sub>

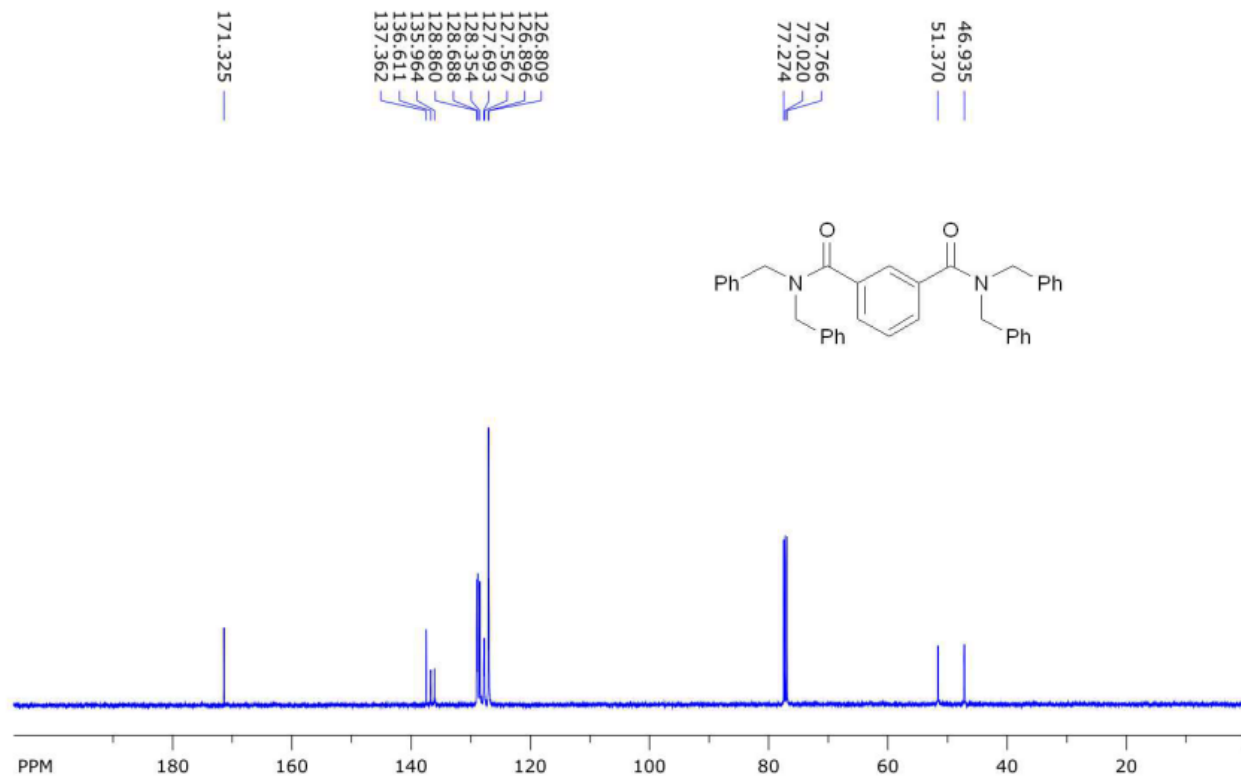

file: D:\NAPO\NMR\500-2\mkr11504\18\fid expt: <zpgpg30>  
 transmitter freq.: 125.772879 MHz  
 time domain size: 65536 points  
 width: 36057.69 Hz = 286.6889 ppm = 0.550197 Hz/pt  
 number of scans: 512

freq. of 0 ppm: 125.757803 MHz  
 processed size: 32768 complex points  
 LB: 2.000 GF: 0.0000  
 Hz/cm: 1045.342 ppm/cm: 8.31135
